# Supplementary material for: Improving the quality of person-centred healthcare from the patient perspective: development of person-centred quality indicators
Source: PubMed Central journal article supplement — BMJ Open. 2020 Oct 29;10(10):e037323. doi: 10.1136/bmjopen-2020-037323 (PMC7597468; doi:10.1136/bmjopen-2020-037323), 2020-10-29
Supplement: bmjopen-2020-037323.draft_revisions.pdf [file bmjopen-2020-037323.draft_revisions.pdf]

# BMJ Open

BMJ Open is committed to open peer review. As part of this commitment we make the peer review history of every article we publish publicly available.

When an article is published we post the peer reviewers' comments and the authors' responses online. We also post the versions of the paper that were used during peer review. These are the versions that the peer review comments apply to.

The versions of the paper that follow are the versions that were submitted during the peer review process. They are not the versions of record or the final published versions. They should not be cited or distributed as the published version of this manuscript.

BMJ Open is an open access journal and the full, final, typeset and author-corrected version of record of the manuscript is available on our site with no access controls, subscription charges or pay-per-view fees (<http://bmjopen.bmj.com>).

If you have any questions on BMJ Open's open peer review process please email [info.bmjopen@bmj.com](mailto:info.bmjopen@bmj.com)

# BMJ Open

## Improving the Quality of Person-Centred Healthcare from the Patient Perspective: Development of Person-Centred Quality Indicators

|                               |                                                                                                                                                                                                                                                                                                                                                                                                                                                                                                                                                                                                                                                                                                                                                                |
|-------------------------------|----------------------------------------------------------------------------------------------------------------------------------------------------------------------------------------------------------------------------------------------------------------------------------------------------------------------------------------------------------------------------------------------------------------------------------------------------------------------------------------------------------------------------------------------------------------------------------------------------------------------------------------------------------------------------------------------------------------------------------------------------------------|
| Journal:                      | <i>BMJ Open</i>                                                                                                                                                                                                                                                                                                                                                                                                                                                                                                                                                                                                                                                                                                                                                |
| Manuscript ID                 | bmjopen-2020-037323                                                                                                                                                                                                                                                                                                                                                                                                                                                                                                                                                                                                                                                                                                                                            |
| Article Type:                 | Original research                                                                                                                                                                                                                                                                                                                                                                                                                                                                                                                                                                                                                                                                                                                                              |
| Date Submitted by the Author: | 29-Jan-2020                                                                                                                                                                                                                                                                                                                                                                                                                                                                                                                                                                                                                                                                                                                                                    |
| Complete List of Authors:     | Santana, Maria-Jose; University of Calgary, Community Health Sciences Manalili, Kimberly; University of Calgary Cumming School of Medicine, Community Health Sciences<br>Zelinsky, Sandra; University of Calgary Cumming School of Medicine<br>Brien, Susan; Health Quality Ontario<br>Gibbons, Elizabeth; Oxford University<br>King, Jenny; Picker Institute Europe<br>Frank, Lori; Patient-Centered Outcomes Research Institute<br>Wallström, Sara; Center for Person Centered Care; University of Gothenburg<br>Fairie, Paul; University of Calgary<br>Leeb, Kira; Victorian Agency for Health Information<br>Quan, Hude; University of Calgary, Department of Community Health Sciences<br>Sawatzky, Richard; Trinity Western University School of Nursing |
| Keywords:                     | Quality in health care < HEALTH SERVICES ADMINISTRATION & MANAGEMENT, Organisation of health services < HEALTH SERVICES ADMINISTRATION & MANAGEMENT, Health policy < HEALTH SERVICES ADMINISTRATION & MANAGEMENT                                                                                                                                                                                                                                                                                                                                                                                                                                                                                                                                               |
|                               |                                                                                                                                                                                                                                                                                                                                                                                                                                                                                                                                                                                                                                                                                                                                                                |

SCHOLARONE™  
Manuscripts

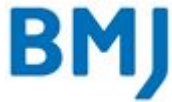

I, the Submitting Author has the right to grant and does grant on behalf of all authors of the Work (as defined in the below author licence), an exclusive licence and/or a non-exclusive licence for contributions from authors who are: i) UK Crown employees; ii) where BMJ has agreed a CC-BY licence shall apply, and/or iii) in accordance with the terms applicable for US Federal Government officers or employees acting as part of their official duties; on a worldwide, perpetual, irrevocable, royalty-free basis to BMJ Publishing Group Ltd ("BMJ") its licensees and where the relevant Journal is co-owned by BMJ to the co-owners of the Journal, to publish the Work in this journal and any other BMJ products and to exploit all rights, as set out in our [licence](#).

The Submitting Author accepts and understands that any supply made under these terms is made by BMJ to the Submitting Author unless you are acting as an employee on behalf of your employer or a postgraduate student of an affiliated institution which is paying any applicable article publishing charge ("APC") for Open Access articles. Where the Submitting Author wishes to make the Work available on an Open Access basis (and intends to pay the relevant APC), the terms of reuse of such Open Access shall be governed by a Creative Commons licence – details of these licences and which [Creative Commons](#) licence will apply to this Work are set out in our licence referred to above.

Other than as permitted in any relevant BMJ Author's Self Archiving Policies, I confirm this Work has not been accepted for publication elsewhere, is not being considered for publication elsewhere and does not duplicate material already published. I confirm all authors consent to publication of this Work and authorise the granting of this licence.

# Improving the Quality of Person-Centred Healthcare from the Patient Perspective: Development of Person-Centred Quality Indicators

## Authorship:

Santana MJ, Manalili K, Zelinsky S, Brien S, Gibbons E, King J, Frank L, Wallström S, Fairie P, Leeb K, Quan H, Sawatzky R

## Affiliations:

Santana MJ, MPharm, PhD, Departments of Paediatrics and Community Health Sciences, Cumming School of Medicine, University of Calgary, Calgary, Alberta, Canada

Manalili K, MPH, PhD Candidate, Department of Community Health Sciences, University of Calgary, Calgary, Alberta, Canada

Zelinsky S, Patient-Partner, Community Health Sciences, Cumming School of Medicine, University of Calgary, Calgary, Alberta, Canada

Brien S, PhD, Health Quality Ontario, Toronto, Ontario, Canada

Gibbons E, MSc, Health Services Research Unit, Nuffield Department of Population Health, University of Oxford, England, UK

King J, MSc, Picker Institute Europe, Oxford, England, UK

Frank L, PhD, Patient-Centered Outcomes Research Institute (PCORI), Washington, US

Wallström S, PhD, Centre for Person-Centred Care (GPCC), Gothenburg, Sweden. Institute of Health and Care Sciences, Sahlgrenska Academy, University of Gothenburg, Gothenburg, Sweden.

Fairie P, PhD, Departments of Paediatrics and Community Health Sciences, Cumming School of Medicine, University of Calgary, Calgary, Alberta, Canada

Leeb K\*, MA, BA, Executive Director, Health and System Performance, Victorian Agency for Health Information, Melbourne, Australia.

Quan H, PhD, Community Health Sciences, Cumming School of Medicine, University of Calgary, Calgary, Alberta, Canada

Sawatzky R, PhD, RN, Trinity Western University School of Nursing, British Columbia, Canada

\*Kira Leeb was the former Director of Health System Performance at the Canadian Institute for Health Information at the start of the project in 2015.

## Article Information

Corresponding Author: Maria J. Santana MPharm, PhD, Departments of Paediatrics and Community Health Sciences, Cumming School of Medicine, University of Calgary & Patient Engagement Lead – Alberta Strategy for Patient Oriented Research. 3280 Hospital Drive NW, Teaching Research and Wellness Building (3E-45, Foothills Campus, University of Calgary, Calgary, Alberta ([mjsantan@ucalgary.ca](mailto:mjsantan@ucalgary.ca)).

Competing Interest Disclosure: Competing interests: All authors have completed the ICMJE uniform disclosure form at [www.icmje.org/coi\\_disclosure.pdf](http://www.icmje.org/coi_disclosure.pdf) and declare: no support from any organisation for the submitted work; no financial relationships with any organisations that might have an interest in the submitted work in the previous three years; no other relationships or activities that could appear to have influenced the submitted work.

### Author Contributions:

*Concept, study design, and acquisition of funding:* Santana, Manalili, Zelinsky, Brien, Gibbons, Leeb, Quan, Sawatzky.

*Data acquisition and interpretation:* all authors.

*Drafting of the manuscript:* Santana, Manalili, Fairie.

*Data analysis:* Santana, Manalili.

*Critical revision of manuscript for intellectual content:* all authors.

Funding: This study was funded by the Canadian Institutes for Health Research (Grant # 201709PJT) and the Alberta Strategy for Patient-Oriented Research. Kimberly Manalili is supported by the Vanier Canada Graduate Scholarship. CIHR played no role in the project. Alberta Strategy for Patient-Oriented Research employs some of the research staff (MJS, KM, SK, PF, HQ) to conduct research into patient-centred care, beyond which there was no involvement in the research.

Transparency statement: The lead author affirms that this manuscript is an honest, accurate, and transparent account of the study being reported; that no important aspects of the study have been omitted; and that any discrepancies from the study as planned (and, if relevant, registered) have been explained.

Data sharing statement: Some materials and documentation may be available to other researchers. Please contact the corresponding author with a detailed request.

Patient and public involvement: In Phase 1 of the study a patient partner (SZ) was recruited to assist the research team. We used a participatory approach to sample diverse patients and caregivers. Focus groups were conducted with the provincial Alberta Health Services Patient and Family Advisory Group, as well as ActionDignity (a Calgary-based NGO). These organizations

1 supported the recruitment, data collection, analysis, and dissemination of findings. Interviews  
2 were conducted with 65 patients and caregivers to identify values, preferences, and needs. We  
3 also consulted 22 related stakeholders on perceptions of feasibility and prioritization of  
4 measuring care. In Phase 2 of the study, we used a consensus process with a panel of 29 people  
5 of patients, caregivers, diverse community members, providers, researchers, and quality  
6 improvement leads. More than half of the panel were patients, caregivers, and community  
7 members. Participants were routinely asked about burdens to participation to ensure appropriate  
8 accommodations.  
9  
10  
11  
12  
13  
14  
15  
16  
17  
18  
19  
20  
21  
22  
23  
24  
25  
26  
27  
28  
29  
30  
31  
32  
33  
34  
35  
36  
37  
38  
39  
40  
41  
42  
43  
44  
45  
46  
47  
48  
49  
50  
51  
52  
53  
54  
55  
56  
57  
58  
59  
60

## ABSTRACT

**Importance:** International efforts are being made towards a person-centered care (PCC) model, but there are currently no standardized mechanisms to measure and monitor PCC at a healthcare system level. The use of metrics to measure PCC can help to drive the changes needed to improve the quality of healthcare that is person-centred.

**Objective:** To develop and validate person-centred care quality indicators (PC-QIs) measuring PCC at a healthcare system level through a synthesis of the evidence and a person-centred consensus approach to ensure the PC-QIs reflect what matters most to people in their care.

**Methods:** Indicators were first identified through a scoping review of the literature, an international environmental scan, focus groups with diverse patients and caregivers, and interviews with clinicians and experts in quality improvement. The identified indicators were subsequently refined by a modified Delphi consensus process using the RAND/UCLA Appropriateness Method. The international consensus panel consisted of patients, family members, community representatives, clinicians, researchers, and healthcare quality experts.

**Results:** From an initial 39 unique evidence-based PC-QIs identified and developed, the consensus process yielded 26 final PC-QIs. These included seven related to structure, 16 related to process, two related to outcome and one overall global PC-QI.

1  
2  
3 **Conclusions:** The final 26 evidence-based and person-informed PC-QIs can be used to measure  
4 and evaluate quality incorporating patient perspectives, empowering jurisdictions to monitor  
5  
6 healthcare system performance and evaluate policy and practice related to PCC.  
7  
8  
9  
10  
11

## 12 Article Summary

### 13 **Strengths and limitations**

- 14 • Using a patient-centred process, we identified 26 indicators to aid in the
- 15 measurement of person centred care.
- 16 • These indicators can be used to identify gaps in the delivery of person-centred
- 17 care.
- 18 • These indicators may not be applicable in all contexts.
- 19 • Future work is needed to evaluate the potential for wider implementation and use
- 20 of the indicators to facilitate improvements in person-centred care.
- 21
- 22
- 23
- 24
- 25
- 26
- 27
- 28
- 29
- 30
- 31
- 32
- 33
- 34
- 35
- 36
- 37
- 38
- 39
- 40
- 41
- 42
- 43
- 44
- 45
- 46
- 47
- 48
- 49
- 50
- 51
- 52
- 53
- 54
- 55
- 56
- 57
- 58
- 59
- 60



## INTRODUCTION

In 2017, health ministers from OECD countries declared that we need to invest in measuring what matters most to patients[1,2]. Ever since patient-centred care (PCC) was first identified as a foundational component of healthcare quality and patient safety by the Institute of Medicine in 2001[3], it has been recognized as a high priority by healthcare systems globally.[4-8] The use of valid and reliable measures to monitor and evaluate PCC can provide the data needed to identify gaps in the delivery of PCC and target areas for improvement, and thus, drive the changes needed to move towards a true PCC model.

However, there are currently no generally accepted indicators for measuring PCC.[9] Moreover, existing indicators do not tend to incorporate the voices of people involved in healthcare, namely, patients, caregivers, and healthcare providers.[14] This gap means that PCC itself might be measured in ways not relevant to patients, and in ways that do not address practical concerns of healthcare providers for person-centred quality improvement.

Evidence also suggests that the delivery of Person-centred care (PCC) improves healthcare quality, including improvement of patient experiences and outcomes, enhanced involvement of people in their own healthcare decisions, more support for health promotion activities, a decrease in healthcare services utilization and costs, and an improvement in healthcare provider satisfaction.[10-13]

This article presents a new set of Person-Centred Quality Indicators (PC-QIs) developed and validated through a modified Delphi process that featured significant patient involvement. These

1  
2  
3 PC-QIs are widely-applicable, evidence-based and patient-informed indicators and can be used  
4  
5 as tools for healthcare quality improvement by leveraging ongoing initiatives to promote person-  
6  
7 centred care. This includes helping to standardize the collection, use, and reporting of patient-  
8  
9 reported data (e.g. through Hospital Consumer Assessment of Health Providers and Systems) or  
10  
11 incorporation of these indicators into performance measurement frameworks. Importantly, these  
12  
13 indicators have the potential to shift our healthcare systems towards a new paradigm for  
14  
15 assessing quality by ensuring we measure what matters most to patients.  
16  
17

## 18 19 **METHODS**

20  
21  
22 The development of the PC-QIs included two phases (see Figure 1, for a diagram of the overall  
23  
24 project). During Phase 1, previously implemented and evaluated PC-QIs were identified and  
25  
26 classified using a published PCC framework.[14] In Phase 2, these identified PC-QIs were  
27  
28 refined through a modified Delphi consensus process[15] that involved patients, caregivers, and  
29  
30 diverse community members, clinicians, quality improvement leaders and decision makers.  
31  
32 Ethics approval was granted from the University Health Research Ethics Boards [REB15-2846]  
33  
34 at the University of Calgary.  
35  
36

37  
38 **FIGURE 1 HERE**

### 39 40 **Patient and Public Involvement**

41  
42  
43 A patient partner (SZ) was recruited to as part of the research team at the study's inception, and  
44  
45 to ensure the study is guided by the patient perspective. The patient partner has played a critical  
46  
47 role in the study design, data collection, review of analyses, interpretation of the data, and the  
48  
49 development of this manuscript, in addition to disseminating the findings of this research.  
50  
51  
52 Moreover, in Phase 1 of this study, we used a participatory approach to engage 65 diverse  
53  
54 patients and caregivers to identify what matters most to them in their healthcare. This would  
55  
56  
57  
58  
59  
60

1  
2  
3 ensure that patient values, needs, and preferences are incorporated into the development of the  
4 indicators. These focus groups were conducted with the provincial Alberta Health Services  
5 Patient and Family Advisory Group, as well as ActionDignity (a Calgary-based non-profit  
6 organization). These organizations supported the development of the focus group discussion  
7 tools, recruitment, data collection, analysis, and dissemination of findings. In Phase 2 of the  
8 study, we used a consensus process with a panel of 29 people of patients, caregivers, diverse  
9 community members, providers, researchers, and quality improvement leads, which is described  
10 in this paper. Participants were routinely asked about burdens to participation to ensure  
11 appropriate accommodations. Once the article has been published, it will be shared with our  
12 patient collaborators and participants.  
13  
14  
15  
16  
17  
18  
19  
20  
21  
22  
23  
24  
25  
26  
27  
28

### 29 **Phase 1: Preliminary review**

30  
31 This first phase involved preparatory work needed for the consensus process. Consistent with a  
32 patient-oriented research approach, and to ensure the patient perspective remains central to the  
33 study, a Patient-Partner (SZ) was recruited to work with the research team throughout all phases  
34 of the study. In order to identify, categorize, and develop PC-QIs, we developed a conceptual  
35 PCC framework[14] based on the Donabedian quality of care model (structure, process and  
36 outcome).[16]  
37  
38  
39  
40  
41  
42  
43  
44  
45  
46

47 This phase also involved a scoping review[17, 18] to identify previously published PC-QIs, their  
48 implementation and evaluation in various settings, as well as best practices of PCC monitoring.  
49 In parallel, an environmental scan was conducted to identify if healthcare systems in Canada, the  
50 United Kingdom, Sweden, Australia and New Zealand were using PC-QIs, which PC-QIs were  
51  
52  
53  
54  
55  
56  
57  
58  
59  
60

1  
2  
3 in use, and how they were implemented.[19] These countries were chosen as they shared many  
4 similarities with respect to healthcare delivery and structures.[19] All unique PC-QIs identified  
5 through the scoping review and environmental scan were synthesized by the research team.[19]  
6  
7  
8  
9

10  
11  
12 Using a person-centred approach, consultations with patients and caregivers, as well as key  
13 stakeholders (i.e. quality improvement leads, healthcare providers, and PCC researchers) were  
14 conducted to inform the development and prioritization of PC-QIs.[20] These consultations were  
15 used to guide how existing PC-QIs could be modified or refined, and to identify any PC-QIs still  
16 needed for development.[21]  
17  
18  
19  
20  
21  
22  
23  
24  
25

26 Specifically, drawing on a transformative framework[22] our research team aimed to consult  
27 with diverse patients and caregivers through a participatory approach, and employed strategies to  
28 attain maximum variation among participants. Focus group discussions were conducted in  
29 partnership with the provincial Alberta Health Services Patient and Family Advisory Group, as  
30 well as ActionDignity, a community-based organization that works closely with ethno-cultural  
31 leaders in Calgary to conduct research and work towards systems and policy change. We  
32 identified healthcare values, preferences, and needs from a diverse sample of 65 patients and  
33 caregivers. Individual interviews with 22 healthcare providers, quality improvement experts, and  
34 PCC researchers from Canada, the USA, and England were conducted to determine perceptions  
35 around feasibility and prioritization of measuring specific domains of PCC.  
36  
37  
38  
39  
40  
41  
42  
43  
44  
45  
46  
47  
48  
49  
50

51 Through a synthesis of the evidence from Phase 1, unique PC-QIs were developed or modified  
52 iteratively by the research team, and subsequently classified using the PCC conceptual  
53  
54  
55  
56  
57  
58  
59  
60

1  
2  
3 framework.[14] The details and key results from these sub-studies for Phase 1 have either been  
4  
5 published or in the process of publication elsewhere.  
6  
7  
8  
9

## 10 **Phase 2: Modified Delphi Panel Exercise**

11  
12 Phase 2 included a consensus process, using the RAND/University of California LA  
13  
14 Appropriateness Method (RAM).[23] RAM is a reproducible and valid nominal group technique  
15  
16 consensus methodology using the modified Delphi technique.[15] RAM is used extensively in  
17  
18 health services research.[23] Based on our previous experience, the consensus method (RAM)  
19  
20 was considered highly appropriate to facilitate the panel's prioritization and refinement PC-  
21  
22 QIs.[24, 25]  
23  
24  
25  
26  
27  
28

### 29 **Panel Selection**

30  
31 A consensus panel of 29 people was established consisting of patients, caregivers, diverse  
32  
33 community members, healthcare providers, PCC researchers, and quality improvement leads. In  
34  
35 recognition of the potential power dynamics associated with mixing groups of patients[20] ,  
36  
37 caregivers, healthcare providers, researchers, and quality improvement experts, we strove to  
38  
39 assemble a panel where at least half of the representation was from patients, caregivers, and  
40  
41 community members. The community members were representative from the some of the most  
42  
43 prominent ethno-cultural communities in Calgary (i.e. Chinese, South Asian, and Filipino). The  
44  
45 panelists were identified from their previous participation in the environmental scan, interviews,  
46  
47 and focus groups conducted in Phase 1, as well as our collaborators' networks.  
48  
49  
50  
51

52 The consensus panel comprised:  
53  
54  
55  
56  
57  
58  
59  
60

- 8 patients and 3 caregivers with various experience with the health care system, including primary care, acute care, cancer care, and chronic diseases (e.g. cardiovascular conditions, diabetes, etc.)
- 5 members of diverse ethno-cultural communities who are also patients and/or caregivers
- 2 healthcare providers (an internist and a pediatrician),
- 5 quality improvement experts (representing Canadian Quality Councils and health systems, Cancer Care Ontario, University of Gothenburg Centre for Person-centred Care, Sweden, Picker Institute, and University of Oxford, UK),
- 4 PCC researchers, including: a lead from the Patient-Centered Outcomes Research Institute (PCORI), a Senior Scientist Collaboration for Leadership in Applied Health Research and Care Oxford Unit, professors from Canadian Universities and leaders of the Canadian Strategy for Patient-Oriented Research
- 1 representative of the Canadian Institute for Health Information
- 1 representative from Ministry of Health, British Columbia

Identified individuals were invited via email and provided with a summary of the project and an overview of the consensus process and expectations (e.g., time commitment and activities). A descriptive summary of the panel members can be found in Table 1.

**Table 1: Characteristics of the Consensus Panel for Person-Centred Quality Indicators**

| <b>Panel Characteristics (n= 29)</b>      |   |
|-------------------------------------------|---|
| <b>Expertise (primary role)</b>           |   |
| Patient                                   | 8 |
| Caregiver                                 | 3 |
| Community Member                          | 5 |
| Person-Centred Care/Masurement Researcher | 5 |
| Ministry of Health/ Measurement Lead      | 1 |

1  
2  
3  
4  
5  
6  
7  
8  
9  
10  
11  
12  
13  
14  
15  
16  
17  
18  
19  
20  
21  
22  
23  
24  
25  
26  
27  
28  
29  
30  
31  
32  
33  
34  
35  
36  
37  
38  
39  
40  
41  
42  
43  
44  
45  
46  
47  
48  
49  
50  
51  
52  
53  
54  
55  
56  
57  
58  
59  
60

|                          |    |
|--------------------------|----|
| Quality Improvement Lead | 5  |
| Physician                | 2  |
|                          |    |
| <b>Sex (Female)</b>      | 20 |
|                          |    |
| <b>Country</b>           |    |
| Canada                   | 25 |
| Sweden                   | 1  |
| United Kingdom           | 2  |
| United States            | 1  |

For peer review only

## Rating Process and Materials

Panelists received a package including:

- a) a manual that included a monograph of each PC-QI identified, and
- b) a rating tool used for panelists to rate the PC-QIs (see: [http://bit.do/PC-QI\\_RatingTool](http://bit.do/PC-QI_RatingTool) )

The package outlined the PC-QIs that included descriptors such as: type of indicator, proposed data source (including existing patient-reported experience measures already in use), definition, numerator, denominator, benchmark, and risk adjustment. The manual also included definitions to describe what PC-QIs are, and what constitutes a “good” quality indicator. Additionally, the rating tool was derived from the Joint Commission Attributes of Core Performance Measures and Associated Evaluation Criteria.[26] The rating tool asked panelists to rate PC-QIs on each of the following dimensions:

- Was the PC-QI precisely defined?
- Does the PC-QI target important PCC improvements?
- Does it measure what is supposed to measure?
- It is a good global PC-QI for overall evaluation?

The ratings materials also included questions related to implementation including *feasibility* (is data for reporting PC-QI available?) and *usability* (is the PC-QI actionable and interpretable?).

Panelists used SurveyMonkey, a web-based survey tool, to remotely rate the PC-QIs in the first, third, and fourth rounds.

### Delphi Round 1

The first round involved remote rating by panelists. In each of these remote rating rounds,



1  
2  
3 panelists used the rating material described above and the rating scale, a 9-point scale (1 = strong  
4 disagreement, 9 = strong agreement). Overall assessment of the PC-QI scored as: *inappropriate*  
5  
6 (1-3), *supplementary* (consider as a PC-QI if more resources available) (4-6) and *appropriate* (7-  
7  
8 9). Panelists also had the opportunity to provide written comments and suggest additional PC-  
9  
10  
11  
12  
13  
14  
15  
16  
17  
18  
19  
20  
21  
22  
23  
24  
25  
26  
27  
28  
29  
30  
31  
32  
33  
34  
35  
36  
37  
38  
39  
40  
41  
42  
43  
44  
45  
46  
47  
48  
49  
50  
51  
52  
53  
54  
55  
56  
57  
58  
59  
60

PC-QIs ratings were summarized using medians and inter-quartile range (IQR) for the overall rating included in the “globally it is a good PC-QI?” rating scale. Disagreement on the rating for a PC-QI of at least a third of the panel ( $n \geq 9$ ) in the median score 1-3 and at least a third ( $n \geq 9$ ) of the panel in the median 7-9. PC-QIs with median overall scores of 1-3 were discarded; PC-QIs with median overall score 4-9 were retained for subsequent rounds. Written comments were analyzed using content analysis methods.

Following remote ratings in round 1, the data were analyzed, and suggestions and refinements were made to each PC-QI as appropriate. This revised version was shared via SurveyMonkey prior to the face-to face meeting.

## Delphi Round 2

During Round 2, panelists reviewed each PC-QI in a face-to-face meeting. Deliberations were made as a group until final agreement on PC-QI specifications was achieved. The 2-day meeting was co-moderated by our patient-partner (SZ) and a clinician researcher.

## Delphi Rounds 3 & 4

Remote ratings in rounds 3 and 4 continued as described in the first remote rating round.

Through the remote rounds, revisions of each PC-QI were added to the working document and

1  
2  
3 circulated among panelists for a final rating using paper-based rating tools for final review.

4  
5 Additionally, a working group, created as a response to the discussions held during the face-to-  
6  
7 face meeting, studied the development of an indicator that captures outcomes reported directly  
8  
9 by the patients.  
10  
11

12  
13  
14 This working group included five patients, two family members, one physician, two quality  
15  
16 improvement leads and two researchers. The group worked on developing the indicator and  
17  
18 gathering information to present background knowledge to the rest of panelists. The new  
19  
20 indicator and additional information were shared among the rest of the panellists and they rated  
21  
22 the new indicator in round 3.  
23  
24  
25

## 26 27 **RESULTS** 28

29  
30 Thirty-nine PC-QIs were identified through Phase 1 and were refined through Phase 2 of the  
31  
32 study, where they were summarized into 26 final PC-QIs. These final 26 PC-QIs included seven  
33  
34 structure, 16 process, two outcome and one global indicator (see Table 2). During the first round  
35  
36 and based on final ratings (see Table 2), 4 indicators were discarded including:  
37  
38

- 39 • Timely Unplanned Readmission from ER
- 40
- 41 • Overall Rating
- 42
- 43 • Patient-reported Outcome Multi-attribute
- 44
- 45 • Patient-reported Outcome Mental Health
- 46  
47  
48

49 Based on the decision to discard the last two PC-QIs, the working group proposed a new  
50  
51 indicator related to Patient-Reported Outcomes: “Using Patient-Reported Outcome Measures to  
52  
53 deliver Patient-Centred Care.” This newly proposed indicator was later rated and accepted in  
54  
55  
56  
57  
58  
59

1  
2  
3  
4  
5  
6  
7  
8  
9  
10  
11  
12  
13  
14  
15  
16  
17  
18  
19  
20  
21  
22  
23  
24  
25  
26  
27  
28  
29  
30  
31  
32  
33  
34  
35  
36  
37  
38  
39  
40  
41  
42  
43  
44  
45  
46  
47  
48  
49  
50  
51  
52  
53  
54  
55  
56  
57  
58  
59  
60

Round 3. Table 2 summarizes the consensus panel ratings. During Round 2, out of the initial 39 indicators, 11 were merged with other indicators. A summary can be found in Table 3.

For peer review only

**Table 2:** Summary of Consensus Panel Ratings for Final 26 PC-QIs Developed by the Panel (Median Score on 9-point Scale and (Interquartile Range))

| Person-Centred Quality Indicators                                         | Round 1 Remote Panel Rating | Round 2 Face-to-Face Panel Rating | Round 3 Remote Panel Rating |
|---------------------------------------------------------------------------|-----------------------------|-----------------------------------|-----------------------------|
| <b>Structure Indicators (n= 7)</b>                                        |                             |                                   |                             |
| Policy on Person-Centred Care                                             | 8 (6, 9)                    | Keep                              | 8 (7, 8)                    |
| Educational Programs on Person-Centred care                               | 8 (7, 9)                    | Keep                              | 8 (7, 8)                    |
| Culturally Competent Care                                                 | 7 (6, 9)                    | Keep                              | 8 (7, 8)                    |
| Co-designing care in partnership with communities                         | 8 (6, 9)                    | Keep                              | 8 (7, 8)                    |
| Providing an Accommodating and Supportive Person-Centred Care Environment | 7 (5, 8)                    | Keep                              | 7 (6, 8)                    |
| Healthcare Information Technology to Support Person-Centred Care          | 8 (5, 9)                    | Keep                              | 8 (7,8)                     |
| Structures to Report Person-Centred Care Performance                      | 8 (8, 9)                    | Keep                              | 8 (8, 9)                    |
| <b>Process Indicators (n=16)</b>                                          |                             |                                   |                             |
| Compassionate Care                                                        | 9 (8, 9)                    | Keep                              | 8 (8, 9)                    |
| Equitable care                                                            | 8 (7, 9)                    | Keep                              | 9 (8, 9)                    |
| Trusting Relationship with Healthcare Provider                            | 9 (8, 9)                    | Keep                              | 8 (8, 9)                    |
| Timely Access to a Primary Care Provider                                  | 8 (7, 9)                    | Keep                              | 8 (6.5, 9)                  |
| Accessing Interpreter Services                                            | 8 (7, 9)                    | Keep                              | 8 (7, 9)                    |
| Communication with Healthcare System                                      | 8 (7, 9)                    | Keep                              | 8 (8, 9)                    |
| Communication between Patient and Healthcare Provider - Nurse             | 8 (7.5, 9)                  | Keep                              | 8 (8, 9)                    |
| Communication between Patient and Healthcare Provider - Physician         | 8 (8, 9)                    | Keep                              | 9 (8, 9)                    |
| Information about Taking Medication                                       | 9 (7, 9)                    | Keep                              | 8 (8, 9)                    |
| Communicating Test Results                                                | 8 (7, 9)                    | Keep                              | 8 (8, 9)                    |
| Coordination of Care                                                      | 9 (7, 9)                    | Keep                              | 8 (8, 9)                    |

| Person-Centred Quality Indicators                                               | Round 1 Remote Panel Rating | Round 2 Face-to-Face Panel Rating                                 | Round 3 Remote Panel Rating |
|---------------------------------------------------------------------------------|-----------------------------|-------------------------------------------------------------------|-----------------------------|
| <b>Process Indicators (n=16) (cont.)</b>                                        |                             |                                                                   |                             |
| Patient and Caregiver Involvement in Decisions about their Care and Treatment   | 8 (8, 9)                    | Keep                                                              | 9 (8, 9)                    |
| Engaging Patients in Managing their Own Health                                  | 8 (7, 9)                    | Keep                                                              | 8 (8, 9)                    |
| Patient Preparation for a Care Plan at a Healthcare Facility                    | 8 (7, 9)                    | Keep                                                              | 8 (7, 9)                    |
| Transition Planning                                                             | 9 (8, 9)                    | Keep                                                              | 9 (8, 9)                    |
| Using Patient-reported Outcome Measures (PROMs) to Deliver Patient-Centred Care | Not developed               | Newly developed derived from previous 'Patient-reported outcomes' | 7 (5, 9)                    |
| <b>Outcome Indicators (n=2)</b>                                                 |                             |                                                                   |                             |
| Cost of Care- Affordability                                                     | 6.5 (5, 9)                  | Keep                                                              | 7 (5,9)                     |
| Overall Experience                                                              | 8 (6, 9)                    | Keep                                                              | 9 (7, 9)                    |
| <b>Global Indicator (n=1)</b>                                                   |                             |                                                                   |                             |
| Friends and Family Test                                                         | 7 (5, 9)                    | 6.5 (2.5, 7)                                                      | 7 (6, 8)                    |

**Table 3:** Merged PC-QIs

| Original PC-QIs                                                                                                                               | Final PC-QIs Incorporating Original PC-QIs                                |
|-----------------------------------------------------------------------------------------------------------------------------------------------|---------------------------------------------------------------------------|
| <b>Structure</b>                                                                                                                              |                                                                           |
| Supporting a Workshop Committed to PCC<br>Partnership with Communities<br>Protocol for integration of structures to support health technology | Policy on PCC                                                             |
| Protocol addressing discriminatory care<br>Program/protocol for recruitment and retention of staff of diverse background                      | Educational Programs on PCC                                               |
| Noise during hospitalization<br>Providing an Environment that Reflects Diversity and Inclusion                                                | Providing an Accommodating and Supportive Person-Centred Care Environment |
| Educational Programs Reflecting Cultural Competency and Humility                                                                              | Culturally Competent Care                                                 |
| <b>Process</b>                                                                                                                                |                                                                           |
| Post-discharge planning<br>Timely follow-up after discharge<br>Discharge summaries available after 48 hour of discharge from hospital         | Transition Planning                                                       |

1  
2  
3 The details of all the modifications can be found in Appendix 1, including a summary of  
4  
5 consensus panel ratings for the final 26 PC-QIs developed (Median Score on 9-point Scale and  
6  
7 Inter-Quartile Range) through the three rounds and final decisions made in round 4.  
8  
9

10  
11  
12 Each of these newly developed indicators are evidence-informed and person-centred, some  
13  
14 addressing a specific aspect of healthcare quality (e.g. safety versus equity). Additional details  
15  
16 and a description of the discussion among panel members will be published elsewhere.  
17  
18  
19

## 20 **DISCUSSION**

21  
22  
23 As Moira Stewart stated in her 2001 editorial: “The patient should be the judge of patient-centred  
24  
25 care.”[27] The overall aim of this research was to ensure that the patient perspective can be used  
26  
27 to inform improvements in healthcare quality by developing a core group of person-centred  
28  
29 quality indicators (PC-QIs), based on a synthesis of the evidence and, importantly, includes what  
30  
31 matters to patients, caregivers, diverse community members, healthcare providers and quality  
32  
33 improvement experts, and researchers, when it comes to healthcare.  
34  
35  
36  
37  
38

39  
40 The strength of this study is the person-centred approach used to develop metrics to evaluate  
41  
42 PCC, which ensures that PCC is evaluated from the perspective of those who provide and receive  
43  
44 care. To our knowledge, this is the first study to develop PC-QIs using a rigorous evidence-based  
45  
46 and person-centred approach. While PC-QIs were identified in the initial scoping review and  
47  
48 environmental scan in Phase 1, these were not developed from the patient perspective. Rather,  
49  
50 much like most quality indicators that are developed, these PC-QIs were developed based on  
51  
52 what healthcare authorities or quality improvement experts deem as most important for their  
53  
54 organization to drive quality improvement. Patients and the public are seldom involved in  
55  
56  
57  
58  
59

1  
2  
3 decisions about quality of care despite being the ones who experience and receive care. How can  
4  
5 PCC be truly improved if we continue to measure PCC without the patient perspective on what  
6  
7 should be measured?  
8  
9

10  
11  
12 These newly developed indicators present an opportunity to improve healthcare quality in ways  
13  
14 that matter most to patients. To drive changes in healthcare policy and practice, there is a need to  
15  
16 develop and implement standardized ongoing mechanisms to measure and evaluate quality  
17  
18 incorporating the patients' perspectives.[13] These PC-QIs offer a tremendous opportunity to use  
19  
20 data already being collected in many healthcare jurisdictions using patient-reported experience  
21  
22 measures (PREMs) and patient-reported outcome measures (PROMs), and to promote the  
23  
24 actionability of this data. While PREMs and PROMs are often used at the provider level, there is  
25  
26 little evidence of use for system-level applications and actionability. These indicators empower  
27  
28 jurisdictions to monitor healthcare system performance and evaluate policy and practice related  
29  
30 to PCC, while also including the patient's voice. Finally, the routinized use of standardized  
31  
32 metrics, such PC-QIs, to evaluate PCC will help to strengthen the evidence-base for the PCC  
33  
34 model.[28]  
35  
36  
37  
38  
39  
40  
41

42 While this method has generated these 26 PC-QIs using a validated consensus method, they may  
43  
44 not necessarily be universally applicable in all countries and settings. Different cultural settings  
45  
46 in different healthcare regulatory environments may mean that different measures may be more  
47  
48 appropriate for certain settings. Further work can be done to tailor and adapt these PC-QIs,  
49  
50 recognizing that a consideration of the local context will ensure a more universal relevance.  
51  
52  
53  
54  
55  
56  
57  
58  
59  
60



1  
2  
3 Future steps for this work include the implementation of these PC-QIs in national and  
4  
5 international jurisdictions to promote PCC and an evaluation of the use of these measures for  
6  
7 improving healthcare quality of care from the perspectives of the patient.  
8  
9  
10  
11  
12  
13  
14  
15  
16  
17  
18  
19  
20  
21  
22  
23  
24  
25  
26  
27  
28  
29  
30  
31  
32  
33  
34  
35  
36  
37  
38  
39  
40  
41  
42  
43  
44  
45  
46  
47  
48  
49  
50  
51  
52  
53  
54  
55  
56  
57  
58  
59  
60

## Acknowledgements

The authors are thankful for the contributions and support to this project by Dr. V. Yiu, Dr. G. Teare, Dr. K Wittmeier, Dr. M. O’Beirne, Dr. N. Jette, Dr. M. Lu, Dr. T. Sajobi, Dr. D. Lorenzetti, D. LeLievre, L. Cuthbertson, and members of the consensus panel.

The authors thank the investigators, collaborators, and partners of the Person-Centred Care Quality Indicators Study, as well as the research team, who supported data collection and analysis for the consensus process, including: Sadia Ahmed, Chelsea Doktorchik, Ashton Chugh, and Bijan Mohamed. The authors would also like extend their gratitude to Dr. Gwen McGhan for her role in facilitating the consensus process, and all of the patients, caregivers, community members, healthcare providers, and researchers who participated in the consensus. The authors would also like to acknowledge Brian Steele, for his support with the submission of this article.

## References

- 1 OECD. Health Ministerial Statement - The next generation of health reforms. Published January 17 2017; accessed November 2019. <http://www.oecd.org/health/ministerial/ministerial-statement-2017.pdf>.
- 2 Coulter, A. Measuring what matters to patients. *BMJ* 2017;356:j816.
- 3 Institute of Medicine. Crossing the quality chasm: A new health system for the 21st century. Washington (DC): National Academies Press:2001.
- 4 Pelzang R. Time to learn: Understanding patient-centred care. *Br J Nurs* 2010;19:912-7.
- 5 National Department of Health - National Health Service. NHS 2010-2015: From Good to Great. Preventative, People-Centred, Productive. 2009.
- 6 Davis K, Schoenbaum SC, Audet AM. A 2020 vision of patient-centered primary care. *J Gen Intern Med* 2005;20:953-7.
- 7 Alberta Health Services. The Patient First Strategy. 2015.
- 8 Stoelwinder JU. Final report of the National Health and Hospitals Reform Commission: will we get the health care governance reform we need? *Med J Aust* 2009;191:387-8.
- 9 World Health Organization. Leading and Managing Change towards People-Centred and Integrated Health Services. 2015.
- 10 Stewart M, Brown JB, Donner A, et al. The impact of patient-centered care on outcomes. *J Fam Pract* 2000;49:796-804.
- 11 McMillan SS, Kendall E, Sav A, et al. Patient-centered approaches to health care: a systematic review of randomized controlled trials. *Med Care Res Rev* 2013;70:567-96.
- 12 Mead N, Bower P. Patient-centred consultations and outcomes in primary care: a review of the literature. *Patient Educ Couns* 2002;48:51-61.
- 13 Berwick DM, Nolan TW, Whittington J. The triple aim: care, health, and cost. *Health Aff* 2008;27:759-69.
- 14 Santana MJ, Manalili K, Jolley RJ, et al. How to practice person-centred care: A conceptual framework. *Health Expect* 2018;21:429-40.
- 15 Jones J, Hunter D. Consensus methods for medical and health services research. *Br Med J* 1995;311:376.
- 16 Donabedian A. Evaluating the quality of medical care. *Milbank Q* 1966;44:166-206.
- 17 Jolley RJ, Lorenzetti DL, Manalili K, et al. Protocol for a scoping review study to identify and classify patient-centred quality indicators. *BMJ Open* 2017;7:e013632.
- 18 Santana MJ, Ahmed S, Lorenzetti D, et al. Measuring patient-centred system performance: a scoping review of patient-centred care quality indicators. *BMJ Open* 2019;9:e023596.
- 19 Doktorchik C, Manalili K, Jolley R, et al. Identifying Canadian patient-centred care measurement practices and quality indicators: a survey. *CMAJ Open* 2018;6:e643.
- 20 McKenzie E, Potestio ML, Boyd JM, et al. Reconciling patient and provider priorities for improving the care of critically ill patients: a consensus method and qualitative analysis of decision making. *Health Expect* 2017;20:1367-74.
- 21 Stelfox HT, Straus SE. Measuring quality of care: considering conceptual approaches to quality indicator development and evaluation. *J Clin Epidemiol* 2013;66:1328-37.
- 22 Mertens DM, Holmes HM, Harris RL. Transformative research and ethics. In: Mertens DM, Ginsberg, PE eds. *The Handbook of Social Research Ethics*. Sage Publications: Thousand Oaks, CA. 2009:85-101.
- 23 Fitch K, Bernstein SJ, Aguilar MD, Burnand B, LaCalle JR. The RAND/UCLA appropriateness method user's manual. RAND CORP: Santa Monica, CA; 2001.

- 1  
2  
3 24 Stelfox HT, Khandwala F, Kirkpatrick AW, Santana MJ. Trauma center volume and quality  
4 improvement programs. *J Trauma Acute Care Surg* 2012;72:962-8.  
5 25 Santana MJ, Stelfox HT. Development and evaluation of evidence-informed quality  
6 indicators for adult injury care. *Ann Surg* 2014;259:186-92.  
7 26 The Joint Commission. Attributes of Core Performance Measures and Associated Evaluation  
8 Criteria. 2010.  
9 27 Stewart M. Towards a global definition of patient centred care: the patient should be the judge  
10 of patient centred care. *BMJ* 2001;322:444-5.  
11 28 Montague T, Gogovor A, Aylen J, et al. Patient-Centred Care in Canada: Key Components  
12 and the Path Forward. *Healthc Q* 2017;20:50-6.  
13  
14  
15  
16  
17  
18  
19  
20  
21  
22  
23  
24  
25  
26  
27  
28  
29  
30  
31  
32  
33  
34  
35  
36  
37  
38  
39  
40  
41  
42  
43  
44  
45  
46  
47  
48  
49  
50  
51  
52  
53  
54  
55  
56  
57  
58  
59  
60

1  
2  
3 **Figure 1 Legend:** This is a flow chart of the PC-QI Delphi process, describing the timeline for  
4 Rounds alongside the numbers of PCQIs surviving each round. There are arrows pointing down  
5 from “39 PCQIs evaluated” to each subsequent “*n* PCQIs evaluated” box, until the final “26  
6 PCQIs evaluated” box.  
7  
8  
9  
10  
11  
12  
13  
14  
15  
16  
17  
18  
19  
20  
21  
22  
23  
24  
25  
26  
27  
28  
29  
30  
31  
32  
33  
34  
35  
36  
37  
38  
39  
40  
41  
42  
43  
44  
45  
46  
47  
48  
49  
50  
51  
52  
53  
54  
55  
56  
57  
58  
59  
60

For peer review only

1  
2  
3  
4  
5  
6  
7  
8  
9  
10  
11  
12  
13  
14  
15  
16  
17  
18  
19  
20  
21  
22  
23  
24  
25  
26  
27  
28  
29  
30  
31  
32  
33  
34  
35  
36  
37  
38  
39  
40  
41  
42  
43  
44  
45  
46  
47

For peer review only

Figure 1: Flow Chart of PC-QI Delphi Process (Ratings and Modifications)

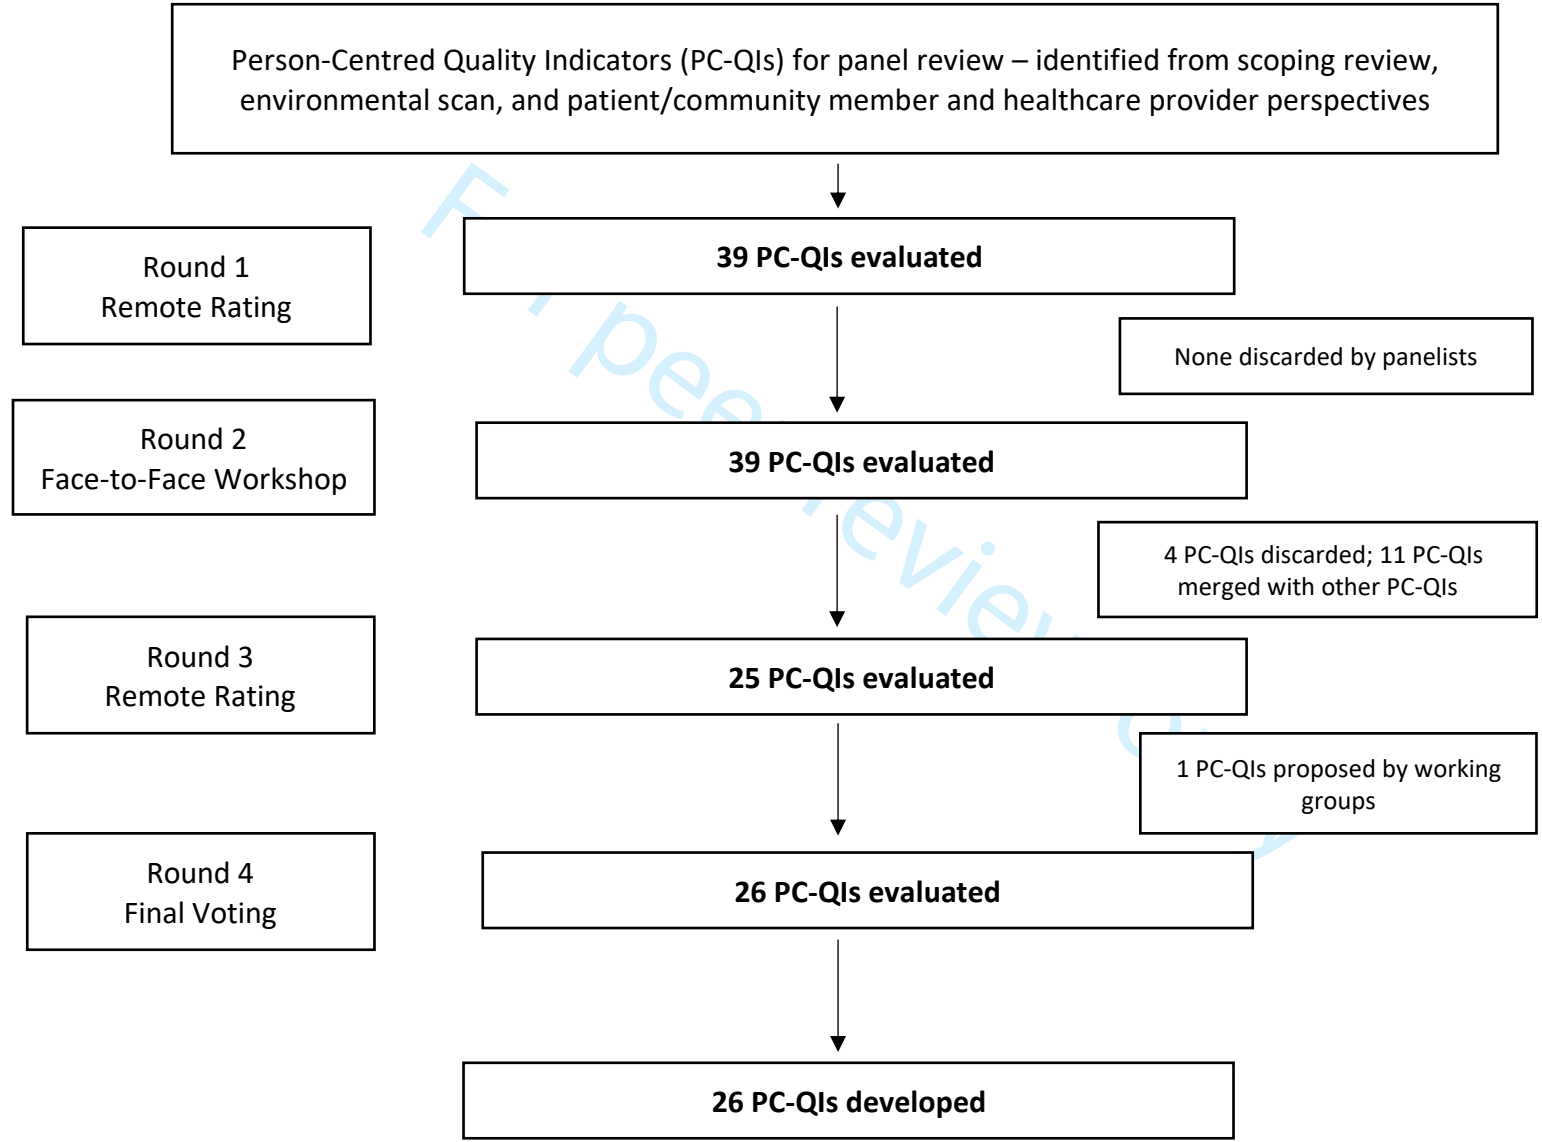

**Appendix 1:** Summary of Ratings and Modifications for PC-QIs Rated and Revised (PC-QIs = 39)

| Initial Person-Centred Quality Indicators                                 | Round 1 Remote Panel Rating Median Score on 9-point Scale (IQR) | Round 2 Face-to-Face Panel Rating Median Score on 9-point Scale (IQR) – as applicable for disagreement<br>*initially rated as Keep/Discard | Round 2 Modifications                                     | Round 3 Remote Panel Rating Median Score on 9-point Scale (IQR) | Round 3 Modifications   | Round 4 Final Remote Panel Rating – Keep/Discard |
|---------------------------------------------------------------------------|-----------------------------------------------------------------|--------------------------------------------------------------------------------------------------------------------------------------------|-----------------------------------------------------------|-----------------------------------------------------------------|-------------------------|--------------------------------------------------|
| <b>Structure Indicators</b>                                               |                                                                 |                                                                                                                                            |                                                           |                                                                 |                         |                                                  |
| Policy on Person-Centred Care                                             | 8 (6, 9)                                                        | Keep                                                                                                                                       | Expanded on description                                   | 8 (7, 8)                                                        | None                    | Keep                                             |
| Educational Programs on Person-Centred care                               | 8 (7, 9)                                                        | Keep                                                                                                                                       | Expanded on description                                   | 8 (7, 8)                                                        | Expanded on description | Keep                                             |
| Protocol addressing Discriminatory Care                                   | 7.5 (6, 9)                                                      | Keep                                                                                                                                       | Merged with “Educational Programs on Person-Centred Care” | N/A                                                             | N/A                     | N/A                                              |
| Protocol Addressing Cultural Competence                                   | 7 (6, 9)                                                        | Keep                                                                                                                                       | Changed wording to “Culturally Competent Care”            | 8 (7, 8)                                                        | Expanded on definition  | Keep                                             |
| Educational Programs reflecting Cultural Competency and Cultural Humility | 7 (6, 9)                                                        | Keep                                                                                                                                       | Merged with “Culturally Competent Care”                   | N/A                                                             | N/A                     | N/A                                              |



|                                                    |                                                                                |            |              |                                                                                              |          |                                                        |      |
|----------------------------------------------------|--------------------------------------------------------------------------------|------------|--------------|----------------------------------------------------------------------------------------------|----------|--------------------------------------------------------|------|
| 1<br>2<br>3<br>4<br>5<br>6<br>7<br>8<br>9          | Program/Protocol for recruitment and retention of staff of diverse backgrounds | 8 (5.5, 9) | Keep         | Merged with "Educational Programs on Person-Centred Care"                                    | N/A      | N/A                                                    | N/A  |
| 10<br>11<br>12<br>13<br>14<br>15                   | Supporting a Workforce Committed to Person-Centred Care                        | 7 (4, 9)   | Disagreement | Merged with "Policy on Person-Centred Care"                                                  | N/A      | N/A                                                    | N/A  |
| 16<br>17<br>18<br>19<br>20<br>21                   | Providing a Supportive and Accommodating Person-Centred Care Environment       | 7 (5, 8)   | Keep         | Clarified language in description                                                            | 7 (6, 8) | None                                                   | Keep |
| 22<br>23<br>24<br>25<br>26<br>27<br>28<br>29       | Providing an Environment that Reflects Diversity and Inclusion                 | 8 (5, 9)   | Keep         | Merged with "Providing a Supportive and Accommodating Person-Centred Care Environment"       | N/A      | N/A                                                    | N/A  |
| 30<br>31<br>32<br>33<br>34<br>35<br>36<br>37<br>38 | Partnership with Communities                                                   | 8 (6, 9)   | Keep         | Expanded description; changed wording to "Co-designing care in partnership with communities" | 8 (7, 8) | Components merged with "Policy on Person-Centred Care" | Keep |
| 39<br>40<br>41<br>42<br>43<br>44<br>45<br>46<br>47 | Protocol for the Integration of                                                | 8 (5, 9)   | Keep         | Expanded description;                                                                        | 8 (6, 8) | Components merged with                                 | N/A  |

|                                                      |          |      |                                                                                       |          |                                 |      |
|------------------------------------------------------|----------|------|---------------------------------------------------------------------------------------|----------|---------------------------------|------|
| Structures to Support Health Information Technology  |          |      | changed working to “Healthcare Information Technology to Support Person-Centred Care” |          | “Policy on Person-Centred Care” |      |
| Structures to Report Person-Centred Care Performance | 8 (8, 9) | Keep | Changes to description of data source                                                 | 8 (8, 9) | None                            | Keep |
| <b>Process Indicators</b>                            |          |      |                                                                                       |          |                                 |      |
| Compassionate Care                                   | 9 (8, 9) | Keep | Broadening of definition, providing example measures                                  | 8 (8, 9) | None                            | Keep |
| Equitable care                                       | 8 (7, 9) | Keep | Broadening of definition, providing example measures                                  | 9 (8, 9) | Expanded definition             | Keep |
| Trusting Relationship with Healthcare Provider       | 9 (8, 9) | Keep | Broadening of definition, providing example measures                                  | 8 (8, 9) | None                            | Keep |
| Accessing Interpreter Services                       | 8 (7, 9) | Keep | Broadening of definition, providing example measures                                  | 8 (7, 9) | None                            | Keep |

|                                                                   |            |      |                                                                    |          |                                                                     |      |
|-------------------------------------------------------------------|------------|------|--------------------------------------------------------------------|----------|---------------------------------------------------------------------|------|
| Communication with Healthcare System                              | 8 (7, 9)   | Keep | Broadening of definition, providing example measures               | 8 (8, 9) | Example items from measure included                                 | Keep |
| Communication between Patient and Healthcare Provider - Nurse     | 8 (7.5, 9) | Keep | Broadening of definition                                           | 8 (8, 9) | Edits to example measures                                           | Keep |
| Communication between Patient and Healthcare Provider - Physician | 8 (8, 9)   | Keep | Broadening of definition                                           | 9 (8, 9) | Edits to example measures                                           | Keep |
| Information about Taking Medication                               | 9 (7, 9)   | Keep | Expanded on description                                            | 8 (8, 9) | Expanded description                                                | Keep |
| Communicating Test Results                                        | 8 (7, 9)   | Keep | Expanded on description; providing example measures                | 8 (8, 9) | None                                                                | Keep |
| Coordinating Your Care                                            | 9 (7, 9)   | Keep | Expanded on description; changed wording to "Coordination of Care" | 8 (8, 9) | Expanded on definition                                              | Keep |
| Patient Involvement in Decisions About Their Care and Treatment   | 8 (8, 9)   | Keep | Broadening of definition                                           | 9 (8, 9) | Changed wording to "Patient and Caregiver Involvement in Decisions" | Keep |

|                                                          |            |         |                                                                                                       |            |                                 |      |
|----------------------------------------------------------|------------|---------|-------------------------------------------------------------------------------------------------------|------------|---------------------------------|------|
|                                                          |            |         |                                                                                                       |            | about Their Care and Treatment" |      |
| Engaging Patients in Managing their Own Health           | 8 (7, 9)   | Keep    | Clarification of self-management                                                                      | 8 (8, 9)   | Expanded on definition          | Keep |
| Timely Access to a Primary Care Provider                 | 8 (7, 9)   | Keep    | None                                                                                                  | 8 (6.5, 9) | None                            | Keep |
| Patient preparation for a planned admission to hospital  | 8 (7, 9)   | Keep    | Broadening of definition and wording changed to "Patient Preparation for a Planned Treatment Program" | 8 (7, 9)   | None                            | Keep |
| Time to Unplanned Admission Through Emergency Department | 7.5 (6, 9) | Discard | Discarded by panel                                                                                    | N/A        | N/A                             | N/A  |
| Discharge Planning                                       | 9 (8, 9)   | Keep    | Change focus from discharge to continuum of care; wording changed to "Transition Planning"            | 9 (8, 9)   | Edits to example measures       | Keep |

|                                                                                                                                                                                                                                                                               |                                                                                       |              |          |                                                                                        |          |                      |      |
|-------------------------------------------------------------------------------------------------------------------------------------------------------------------------------------------------------------------------------------------------------------------------------|---------------------------------------------------------------------------------------|--------------|----------|----------------------------------------------------------------------------------------|----------|----------------------|------|
| 1<br>2<br>3<br>4<br>5<br>6<br>7<br>8<br>9<br>10<br>11<br>12<br>13<br>14<br>15<br>16<br>17<br>18<br>19<br>20<br>21<br>22<br>23<br>24<br>25<br>26<br>27<br>28<br>29<br>30<br>31<br>32<br>33<br>34<br>35<br>36<br>37<br>38<br>39<br>40<br>41<br>42<br>43<br>44<br>45<br>46<br>47 | Post-Discharge Planning                                                               | 8 (7, 9)     | Keep     | Merged with "Transition Planning"                                                      | N/A      | N/A                  | N/A  |
|                                                                                                                                                                                                                                                                               | Timely Follow-up with Hospital Discharged Patients                                    | 8 (5, 9)     | Keep     | Merged with "Transition Planning"                                                      | N/A      | N/A                  | N/A  |
|                                                                                                                                                                                                                                                                               | Discharge Summaries Available to Community Care Provider Within 48 Hours of Discharge | 8 (7, 9)     | Keep     | Merged with "Transition Planning"                                                      | N/A      | N/A                  | N/A  |
|                                                                                                                                                                                                                                                                               | Noise During Hospitalization/Stay                                                     | 7 (6, 8)     | Keep     | Merged with "Providing a supportive and accommodating person-centred care environment" | N/A      | N/A                  | N/A  |
|                                                                                                                                                                                                                                                                               | <b>Outcome Indicators</b>                                                             |              |          |                                                                                        |          |                      |      |
|                                                                                                                                                                                                                                                                               | Overall Rating                                                                        | 7.5 (5, 8.5) | Discard  | Discarded by panel                                                                     | N/A      | N/A                  | N/A  |
|                                                                                                                                                                                                                                                                               | Overall Experience                                                                    | 8 (6, 9)     | Keep     | None                                                                                   | 9 (7, 9) | Expanded description | Keep |
|                                                                                                                                                                                                                                                                               | Cost of Care-Affordability                                                            | 6.5 (5, 9)   | Keep     | None                                                                                   | 7 (5, 9) | None                 | Keep |
|                                                                                                                                                                                                                                                                               | Patient-Reported Outcomes – General Health                                            | 7 (5, 9)     | 2 (1, 4) | Discarded by panel; agreed to discuss in working group                                 | 7 (5, 9) | None                 | Keep |

|                                             |          |              |                    |          |      |      |
|---------------------------------------------|----------|--------------|--------------------|----------|------|------|
| Patient-reported Outcomes – Multi-attribute | 7 (5, 8) | Discard      | Discarded by panel | N/A      | N/A  | N/A  |
| Patient Reported Outcomes- Mental Health    | 7 (5, 9) | Discard      | Discarded by panel | N/A      | N/A  | N/A  |
| <b>Global Indicator (n=1)</b>               |          |              |                    |          |      |      |
| Friends and Family Test                     | 7 (5, 9) | 6.5 (2.5, 7) | None               | 7 (6, 8) | None | Keep |

# BMJ Open

## Improving the Quality of Person-Centred Healthcare from the Patient Perspective: Development of Person-Centred Quality Indicators

|                                 |                                                                                                                                                                                                                                                                                                                                                                                                                                                                                                                                                                                                                                                                                                                                                                |
|---------------------------------|----------------------------------------------------------------------------------------------------------------------------------------------------------------------------------------------------------------------------------------------------------------------------------------------------------------------------------------------------------------------------------------------------------------------------------------------------------------------------------------------------------------------------------------------------------------------------------------------------------------------------------------------------------------------------------------------------------------------------------------------------------------|
| Journal:                        | <i>BMJ Open</i>                                                                                                                                                                                                                                                                                                                                                                                                                                                                                                                                                                                                                                                                                                                                                |
| Manuscript ID                   | bmjopen-2020-037323.R1                                                                                                                                                                                                                                                                                                                                                                                                                                                                                                                                                                                                                                                                                                                                         |
| Article Type:                   | Original research                                                                                                                                                                                                                                                                                                                                                                                                                                                                                                                                                                                                                                                                                                                                              |
| Date Submitted by the Author:   | 29-Jun-2020                                                                                                                                                                                                                                                                                                                                                                                                                                                                                                                                                                                                                                                                                                                                                    |
| Complete List of Authors:       | Santana, Maria-Jose; University of Calgary, Community Health Sciences Manalili, Kimberly; University of Calgary Cumming School of Medicine, Community Health Sciences<br>Zelinsky, Sandra; University of Calgary Cumming School of Medicine<br>Brien, Susan; Health Quality Ontario<br>Gibbons, Elizabeth; Oxford University<br>King, Jenny; Picker Institute Europe<br>Frank, Lori; Patient-Centered Outcomes Research Institute<br>Wallström, Sara; Center for Person Centered Care; University of Gothenburg<br>Fairie, Paul; University of Calgary<br>Leeb, Kira; Victorian Agency for Health Information<br>Quan, Hude; University of Calgary, Department of Community Health Sciences<br>Sawatzky, Richard; Trinity Western University School of Nursing |
| <b>Primary Subject Heading</b>: | Patient-centred medicine                                                                                                                                                                                                                                                                                                                                                                                                                                                                                                                                                                                                                                                                                                                                       |
| Secondary Subject Heading:      | Health services research                                                                                                                                                                                                                                                                                                                                                                                                                                                                                                                                                                                                                                                                                                                                       |
| Keywords:                       | Quality in health care < HEALTH SERVICES ADMINISTRATION & MANAGEMENT, Organisation of health services < HEALTH SERVICES ADMINISTRATION & MANAGEMENT, Health policy < HEALTH SERVICES ADMINISTRATION & MANAGEMENT                                                                                                                                                                                                                                                                                                                                                                                                                                                                                                                                               |
|                                 |                                                                                                                                                                                                                                                                                                                                                                                                                                                                                                                                                                                                                                                                                                                                                                |

SCHOLARONE™  
Manuscripts



I, the Submitting Author has the right to grant and does grant on behalf of all authors of the Work (as defined in the below author licence), an exclusive licence and/or a non-exclusive licence for contributions from authors who are: i) UK Crown employees; ii) where BMJ has agreed a CC-BY licence shall apply, and/or iii) in accordance with the terms applicable for US Federal Government officers or employees acting as part of their official duties; on a worldwide, perpetual, irrevocable, royalty-free basis to BMJ Publishing Group Ltd ("BMJ") its licensees and where the relevant Journal is co-owned by BMJ to the co-owners of the Journal, to publish the Work in this journal and any other BMJ products and to exploit all rights, as set out in our [licence](#).

The Submitting Author accepts and understands that any supply made under these terms is made by BMJ to the Submitting Author unless you are acting as an employee on behalf of your employer or a postgraduate student of an affiliated institution which is paying any applicable article publishing charge ("APC") for Open Access articles. Where the Submitting Author wishes to make the Work available on an Open Access basis (and intends to pay the relevant APC), the terms of reuse of such Open Access shall be governed by a Creative Commons licence – details of these licences and which [Creative Commons](#) licence will apply to this Work are set out in our licence referred to above.

Other than as permitted in any relevant BMJ Author's Self Archiving Policies, I confirm this Work has not been accepted for publication elsewhere, is not being considered for publication elsewhere and does not duplicate material already published. I confirm all authors consent to publication of this Work and authorise the granting of this licence.



# Improving the Quality of Person-Centred Healthcare from the Patient Perspective: Development of Person-Centred Quality Indicators

## Authorship:

Santana MJ, Manalili K, Zelinsky S, Brien S, Gibbons E, King J, Frank L, Wallström S, Fairie P, Leeb K, Quan H, Sawatzky R

## Affiliations:

Santana MJ, MPharm, PhD, Departments of Paediatrics and Community Health Sciences, Cumming School of Medicine, University of Calgary, Calgary, Alberta, Canada

Manalili K, MPH, PhD Candidate, Department of Community Health Sciences, University of Calgary, Calgary, Alberta, Canada

Zelinsky S, Patient-Partner, Community Health Sciences, Cumming School of Medicine, University of Calgary, Calgary, Alberta, Canada

Brien S, PhD, Health Quality Ontario, Toronto, Ontario, Canada

Gibbons E, MSc, Health Services Research Unit, Nuffield Department of Population Health, University of Oxford, England, UK

King J, MSc, Picker Institute Europe, Oxford, England, UK

Frank L, PhD, Patient-Centered Outcomes Research Institute (PCORI), Washington, US

Wallström S, PhD, Centre for Person-Centred Care (GPCC), Gothenburg, Sweden. Institute of Health and Care Sciences, Sahlgrenska Academy, University of Gothenburg, Gothenburg, Sweden.

Fairie P, PhD, Department of Community Health Sciences, Cumming School of Medicine, University of Calgary, Calgary, Alberta, Canada

Leeb K\*, MA, BA, Executive Director, Health and System Performance, Victorian Agency for Health Information, Melbourne, Australia.

Quan H, PhD, Community Health Sciences, Cumming School of Medicine, University of Calgary, Calgary, Alberta, Canada

Sawatzky R, PhD, RN, Trinity Western University School of Nursing, British Columbia, Canada

1  
2  
3  
4 1  
5 2 \*Kira Leeb was the former Director of Health System Performance at the Canadian Institute for  
6 3 Health Information at the start of the project in 2015.  
7 4

## 8 5 **Article Information**

9 6  
10 7 Corresponding Author: Maria J. Santana MPharm, PhD, Departments of Paediatrics and  
11 8 Community Health Sciences, Cumming School of Medicine, University of Calgary & Patient  
12 9 Engagement Lead – Alberta Strategy for Patient Oriented Research. 3280 Hospital Drive NW,  
13 10 Teaching Research and Wellness Building (3E-45, Foothills Campus, University of Calgary,  
14 11 Calgary, Alberta ([mjsantan@ucalgary.ca](mailto:mjsantan@ucalgary.ca)).  
15 12

16 13 Competing Interest Disclosure: Competing interests: All authors have completed the ICMJE  
17 14 uniform disclosure form at [www.icmje.org/coi\\_disclosure.pdf](http://www.icmje.org/coi_disclosure.pdf) and declare: no support from any  
18 15 organisation for the submitted work; no financial relationships with any organisations that might  
19 16 have an interest in the submitted work in the previous three years; no other relationships or  
20 17 activities that could appear to have influenced the submitted work.  
21 18

### 22 19 Author Contributions:

23 20 MJS, KM, SZ, SB, EG, KL, HQ, and RS contributed to the study concept, study design, and  
24 21 acquisition of funding. MJS and KM conducted data analysis and the modifications/refinements  
25 22 to the Person-Centred Quality Indicators that are presented in this manuscript. The manuscript  
26 23 was drafted by MJS, KM, and PF. All authors (MJS, KM, SZ, SB, EG, JK, LF, SW, PF, KL,  
27 24 HQ, and RS) contributed to the data acquisition and interpretation, critical review and revision of  
28 25 the manuscript for intellectual content. All authors also provided their final approval of this  
29 26 publication and agree to be accountable for all aspects of the work to ensure both accuracy and  
30 27 integrity of this research.  
31 28

32 29 Funding: This study was funding by the Canadian Institutes for Health Research (Grant #  
33 30 201709PJT) and the Alberta Strategy for Patient-Oriented Research. Kimberly Manalili is  
34 31 supported by the Vanier Canada Graduate Scholarship. CIHR played no role in the project.  
35 32 Alberta Strategy for Patient-Oriented Research employs some of the research staff (MJS, KM,  
36 33 SK, PF, HQ) to conduct research into patient-centred care, beyond which there was no  
37 34 involvement in the research.  
38 35

39 36 Transparency statement: The lead author affirms that this manuscript is an honest, accurate, and  
40 37 transparent account of the study being reported; that no important aspects of the study have been  
41 38 omitted; and that any discrepancies from the study as planned (and, if relevant, registered) have  
42 39 been explained.  
43 40

44 41 License statement: “The Corresponding Author has the right to grant on behalf of all authors and  
45 42 does grant on behalf of all authors, a worldwide licence to the Publishers and its licencees in  
46 43 perpetuity, in all forms, formats and media (whether known now or created in the future), to i)  
47 44 publish, reproduce, distribute, display and store the Contribution, ii) translate the Contribution  
48 45 into other languages, create adaptations, reprints, include within collections and create  
49 46 summaries, extracts and/or, abstracts of the Contribution, iii) create any other derivative work(s)  
50  
51  
52  
53  
54  
55  
56  
57  
58  
59  
60

1 based on the Contribution, iv) to exploit all subsidiary rights in the Contribution, v) the inclusion  
2 of electronic links from the Contribution to third party material where—ever it may be located;  
3 and, vi) licence any third party to do any or all of the above.

4  
5 Data sharing statement: Some materials and documentation may be available to other  
6 researchers. Please contact the corresponding author with a detailed request.  
7  
8  
9  
10  
11  
12  
13  
14  
15  
16  
17  
18  
19  
20  
21  
22  
23  
24  
25  
26  
27  
28  
29  
30  
31  
32  
33  
34  
35  
36  
37  
38  
39  
40  
41  
42  
43  
44  
45  
46  
47  
48  
49  
50  
51  
52  
53  
54  
55  
56  
57  
58  
59  
60

## ABSTRACT

**Importance:** International efforts are being made towards a person-centered care (PCC) model, but there are currently no standardized mechanisms to measure and monitor PCC at a healthcare system level. The use of metrics to measure PCC can help to drive the changes needed to improve the quality of healthcare that is person-centred.

**Objective:** To develop and validate person-centred care quality indicators (PC-QIs) measuring PCC at a healthcare system level through a synthesis of the evidence and a person-centred consensus approach to ensure the PC-QIs reflect what matters most to people in their care.

**Methods:** Existing indicators were first identified through a scoping review of the literature, and an international environmental scan. Focus group discussions with diverse patients and caregivers, and interviews with clinicians and experts in quality improvement allowed us to identify gaps in current measurement of PCC and inform the development of new PC-QIs. A set of identified and newly developed PC-QIs were subsequently refined by Delphi consensus process using a modified RAND/UCLA Appropriateness Method. The international consensus panel consisted of patients, family members, community representatives, clinicians, researchers, and healthcare quality experts.

**Results:** From an initial 39 unique evidence-based PC-QIs identified and developed, the consensus process yielded 26 final PC-QIs. These included seven related to structure, 16 related to process, two related to outcome and one overall global PC-QI.

1 **Conclusions:** The final 26 evidence-based and person-informed PC-QIs can be used to measure  
2 and evaluate quality incorporating patient perspectives, empowering jurisdictions to monitor  
3 healthcare system performance and evaluate policy and practice related to PCC.

#### 4 **Article Summary**

##### **Strengths and limitations**

- The development of the Person-Centred Quality Indicators (PC-QIs) was conducted using a multi-phased rigorous scientific process in collaboration with an international team of experts.
- The development of the indicators followed the National Quality Forum's criteria for "good quality indicators."
- The perspectives of diverse patients, caregivers, and community members were incorporated into the development of the PC-QIs, as well as healthcare providers and quality improvement experts.
- The study did not include an evaluation of PC-QI implementation.

## INTRODUCTION

In 2017, health ministers from OECD countries declared that we need to invest in measuring what matters most to patients[1,2]. Ever since patient-centred care (PCC) was first identified as a foundational component of healthcare quality and patient safety by the Institute of Medicine in 2001[3], it has been recognized as a high priority by healthcare systems globally.[4-8] The use of valid and reliable measures to monitor and evaluate PCC can provide the data needed to identify gaps in the delivery of PCC and target areas for improvement, and thus, drive the changes needed to move towards a true PCC model.

However, there are currently no generally accepted indicators for measuring PCC.[9] Moreover, existing indicators do not tend to incorporate the voices of people involved in healthcare, namely, patients, caregivers, and healthcare providers.[10] This gap means that PCC itself might be measured in ways not relevant to patients, and in ways that do not address practical concerns of healthcare providers for person-centred quality improvement.

Evidence also suggests that the delivery of PCC improves healthcare quality, including improvement of patient experiences and outcomes, enhanced involvement of people in their own healthcare decisions, more support for health promotion activities, a decrease in healthcare services utilization and costs, and an improvement in healthcare provider satisfaction.[11-14]

The overall aim of this research was to ensure that the patient perspective can be used to inform improvements in healthcare quality at the system level by developing a core group of person-

1 centred quality indicators (PC-QIs), based on a synthesis of the evidence and, importantly,  
2 includes what matters to patients, caregivers, diverse community members, healthcare providers  
3 and quality improvement experts, and researchers, when it comes to healthcare. This article  
4 presents a new set of evidence-based and person-informed PC-QIs that were developed and  
5 validated through a modified Delphi consensus. The use these standardized metrics to measure  
6 PCC can help to drive the changes needed to improve the quality of healthcare that is person-  
7 centred.

## 8 **METHODS**

9 This study was part of a multi-phased programme of research to develop, implement, and  
10 evaluate PC-QIs for measuring and improving PCC (See *Figure 1 – Study at a glance*). The  
11 development of the PC-QIs included two phases. During Phase 1, previously implemented and  
12 evaluated PC-QIs were identified and classified using a published PCC framework.[10] In Phase  
13 2, these identified PC-QIs were refined through a modified Delphi consensus process [15] that  
14 involved patients, caregivers, and diverse community members, clinicians, quality improvement  
15 leaders and decision makers. While this paper provides an overview of the methods used to  
16 develop the PC-QIs prior to the consensus process, additional details regarding the first phase of  
17 this research (i.e. scoping review of the literature, international environmental scan, focus group  
18 discussions, and interviews with stakeholders) will be published elsewhere. Ethics approval was  
19 granted from the University Health Research Ethics Boards [REB15-2846] at the University of  
20 Calgary.

21 **FIGURE 1 HERE**

22 **Patient and Public Involvement**

23 Our research is guided by a transformative framework with the aim of producing knowledge that

1 seeks to improve healthcare for all people, whilst acknowledging that marginalized groups do not  
2  
3  
4  
5  
6  
7  
8  
9  
10  
11  
12  
13  
14  
15  
16  
17  
18  
19  
20  
21  
22  
23  
24  
25  
26  
27  
28  
29  
30  
31  
32  
33  
34  
35  
36  
37  
38  
39  
40  
41  
42  
43  
44  
45  
46  
47  
48  
49  
50  
51  
52  
53  
54  
55  
56  
57  
58  
59  
60

1 seeks to improve healthcare for all people, whilst acknowledging that marginalized groups do not  
2 tend to be included in the production of knowledge due to existing power and social relationships  
3 within society. [16] Thus, consistent with a PCC, we strived to consult with diverse patients and  
4 caregivers as active collaborators through a participatory approach – doing research “with” rather  
5 than “on” them.

6  
7 A patient partner (SZ) was recruited to as part of the research team at the study’s inception, and  
8 to ensure the study is guided by the patient perspective. The patient partner has played a critical  
9 role in the study design, data collection, review of analyses, interpretation of the data, and the  
10 development of this manuscript, in addition to disseminating the findings of this research.

11 Moreover, in Phase 1 of this study, we used a participatory approach to engage diverse patients  
12 and caregivers to identify what matters most to them in their healthcare. This would ensure that  
13 patient values, needs, and preferences are incorporated into the development of the indicators.

14 These focus groups were conducted with the provincial Alberta Health Services Patient and  
15 Family Advisory Group, as well as ActionDignity ([www.actiondignity.org](http://www.actiondignity.org)), a community-based  
16 organization that works closely with ethno-cultural leaders in Calgary to conduct research and  
17 work towards systems and policy change. These organizations supported the development of the  
18 focus group discussion tools, recruitment, data collection, analysis, and dissemination of  
19 findings. In Phase 2 of the study, we used a consensus process with a panel of 29 people of  
20 patients, caregivers, diverse community members, providers, researchers, and quality  
21 improvement leads, which is described in this paper. Participants were routinely asked about  
22 burdens to participation to ensure appropriate accommodations.



## 1 Phase 1: Preliminary review

2 This first phase involved preparatory work needed for the consensus process. In order to identify,  
3 categorize, and develop PC-QIs, we developed a conceptual PCC framework [10] based on the  
4 Donabedian quality of care model (Structure, Process and Outcome).[17]

5  
6 This phase also involved a scoping review [18,19] to identify 29 previously published PC-QIs,  
7 their implementation and evaluation in various settings, as well as best practices of PCC  
8 monitoring. To be eligible for inclusion, studies/articles had to (1) identify quality indicators for  
9 PCC and/or (2) identify PC-QIs in performance measurement (e.g., validation).[18] Indicators  
10 were assessed as being person-centred, based on the use of a PCC conceptual framework.[10]

11  
12 In parallel to the scoping review [19], an environmental scan was conducted to identify if  
13 healthcare systems in Canada, the United Kingdom, Sweden, Australia and New Zealand were  
14 using PC-QIs, which PC-QIs were in use, and how they were implemented.[20] These countries  
15 were chosen as they shared many similarities with respect to healthcare delivery and  
16 structures.[20] 61 existing indicators were identified. All unique PC-QIs identified through the  
17 scoping review and environmental scan were synthesized by the research team.

18  
19 Focus group discussions with patients and caregivers, as well interviews as key stakeholders (i.e.  
20 quality improvement leads, healthcare providers, and PCC researchers) were conducted to  
21 inform the development and prioritization of PC-QIs. With regards to focus group discussions,  
22 we employed strategies to attain maximum variation among participants to ensure the patient and  
23 caregiver perspectives represent a greater diversity of people, with considerations for age, race,

1 ethnicity, indigeneity, gender and sexual identities, rural/urban, disease conditions, and health  
2 care sectors accessed. Focus group discussions were conducted in partnership with the provincial  
3 Alberta Health Services Patient and Family Advisory Group and ActionDignity (described  
4 previously). These organizations supported the recruitment, data collection, analysis, and  
5 dissemination of findings. We identified healthcare values, preferences, and needs from a diverse  
6 sample of 65 patients and caregivers. Individual interviews with 22 healthcare providers, quality  
7 improvement experts, and PCC researchers from Canada, the USA, and England were conducted  
8 to determine perceptions around feasibility and prioritization of measuring specific domains of  
9 PCC. The findings from these focus groups and interviews were used to identify the most  
10 important PC-QIs from those that were found in the scoping review and environmental scan, as  
11 well as to guide how existing PC-QIs could be modified or refined. The focus groups and  
12 interviews also allowed us to identify any PC-QIs still needed for development.

13  
14 Based on the findings from Phase 1 and a review of the literature pertaining to gaps in  
15 measurement identified through the focus groups and interviews (i.e. access to an interpreter,  
16 cost of care, etc.), 39 unique PC-QIs were developed or modified iteratively by the research  
17 team, and subsequently classified using the PCC conceptual framework.[10] The details and key  
18 results from these sub-studies for Phase 1 have either been published or in the process of  
19 publication elsewhere. [18-20]

## 21 **Phase 2: Modified Delphi Panel Exercise**

22 Phase 2 included a consensus process, using the RAND/University of California LA  
23 Appropriateness Method (RAM).[21] RAM is a reproducible and valid nominal group technique

1  
2  
3 1 consensus methodology using the modified Delphi technique.[15] This consensus method is used  
4  
5 2 extensively in health services research.[21-23] Based on our previous experience [24, 25], the  
6  
7 3 consensus method was considered highly appropriate to facilitate the panel's prioritization and  
8  
9 4 refinement PC-QIs. The Delphi technique was modified to include additional people as part of  
10  
11 5 the consensus process, to ensure greater representation from patients, caregivers, community  
12  
13 6 members.  
14  
15

## 17 7 Panel Selection

18  
19  
20 8 A consensus panel was established consisting of patients, caregivers, diverse community  
21  
22 9 members, healthcare providers, PCC researchers, and quality improvement leads. In recognition  
23  
24 10 of the potential power dynamics associated with mixing groups of patients [22] , caregivers,  
25  
26 11 healthcare providers, researchers, and quality improvement experts, we strove to assemble a  
27  
28 12 panel where at least half of the representation was from patients, caregivers, and community  
29  
30 13 members. The community members were representative from the some of the most prominent  
31  
32 14 ethno-cultural communities in Calgary (i.e. Chinese, South Asian, and Filipino). The panelists  
33  
34 15 were identified from their previous participation in the environmental scan, interviews, and focus  
35  
36 16 groups conducted in Phase 1, as well as our collaborators' networks. Identified individuals were  
37  
38 17 invited via email and provided with a summary of the project and an overview of the consensus  
39  
40 18 process and expectations (e.g., time commitment and activities).  
41  
42  
43  
44

## 46 20 Rating Process and Materials

47  
48  
49 21 Panelists received a package including:

- 50  
51 22 a) a manual that included a monograph of each PC-QI identified, and  
52  
53 23 b) a rating tool used for panelists to rate the PC-QIs (see rating tool here: [http://bit.do/PC-](http://bit.do/PC-QI_RatingTool)  
54  
55 24 [QI\\_RatingTool](http://bit.do/PC-QI_RatingTool))  
56  
57  
58  
59  
60

1  
2  
3 1 The package outlined the PC-QIs that included descriptors such as: type of indicator, proposed  
4  
5 2 data source (including existing patient-reported experience measures already in use), definition,  
6  
7 3 numerator, denominator, benchmark, and risk adjustment. The manual also included definitions  
8  
9 4 to describe what PC-QIs are, and what constitutes a “good” quality indicator, as outlined by the  
10  
11 5 National Quality Forum, which states the criteria for evaluating a new measure: importance,  
12  
13 6 scientific acceptability, feasibility, and usability.[26] Additionally, the rating tool was derived  
14  
15 7 from the Joint Commission Attributes of Core Performance Measures and Associated Evaluation  
16  
17 8 Criteria.[27] The rating tool asked panelists to rate PC-QIs on each of the following dimensions:

- 9 • Was the PC-QI precisely defined?
- 10 • Does the PC-QI target important PCC improvements?
- 11 • Does it measure what is supposed to measure?
- 12 • It is a good global PC-QI for overall evaluation?

13 These questions were designed to assess *face, as well as construct validity* (i.e. whether the PC-  
14 QI measures what it is supposed to measure), and *appropriateness* (whether the PC-QI is an  
15 appropriate measure for PCC). The ratings materials also included questions related to  
16 implementation including *feasibility* (is data for reporting PC-QI available?) and *usability* (is the  
17 PC-QI actionable and interpretable?). Panelists used SurveyMonkey, a web-based survey tool, to  
18 remotely rate the PC-QIs in the first, third, and fourth rounds.

## 19 20 Delphi Round 1

21 The first round involved remote rating by panelists. In each of these remote rating rounds,  
22 panelists used the rating material described above and the rating scale, a 9-point scale (1 = strong  
23 disagreement, 9 = strong agreement). Overall assessment of the PC-QI scored as: *inappropriate*  
24 (1-3), *supplementary* (consider as a PC-QI if more resources available) (4-6) and *appropriate* (7-

1  
2  
3 1 9).[21] Panelists also had the opportunity to provide written comments and suggest additional  
4  
5 2 PC-QIs.  
6  
7 3  
8  
9  
10 4 PC-QIs ratings were summarized using medians and inter-quartile range (IQR) for the overall  
11  
12 5 rating included in the “globally it is a good PC-QI?” rating scale. Disagreement on the rating for  
13  
14 6 a PC-QI of at least a third of the panel ( $n \geq 9$ ) in the median score 1-3 and at least a third ( $n \geq 9$ )  
15  
16 7 of the panel in the median 7-9. PC-QIs with median overall scores of 1-3 were discarded; PC-QIs  
17  
18 8 with median overall score 4-9 were retained for subsequent rounds. Written comments were  
19  
20 9 analyzed using content analysis methods.  
21  
22  
23

24 10  
25  
26 11 Following remote ratings in round 1, the data were analyzed, and suggestions and refinements  
27  
28 12 were made to each PC-QI as appropriate. This revised version was shared via SurveyMonkey  
29  
30 13 prior to the face-to face meeting.  
31  
32

#### 33 34 14 Delphi Round 2

35  
36 15 During Round 2, panelists reviewed each PC-QI in a face-to-face meeting as well as the results  
37  
38 16 from the first round. The 2-day meeting was co-moderated by our patient-partner (SZ) and a  
39  
40 17 clinician researcher. The moderators led the panel through each of the PC-QIs to review the  
41  
42 18 results from the first round and to note areas of disagreement (indicated by the ratings) as they  
43  
44 19 pertained to: perceived importance/necessity and relevancy for person-centred care; scientific  
45  
46 20 acceptability (reliability and validity); feasibility of implementing the PC-QIs given different  
47  
48 21 contexts of care; and usability to make improvements in care. The research team was available  
49  
50 22 to answer clarifying questions about how the PC-QI was identified/developed and the source of  
51  
52 23 the evidence supporting the PC-QIs. Deliberations were made as a group until agreement on PC-  
53  
54  
55  
56  
57  
58  
59  
60

1 QI specifications was achieved through discussion and subsequent rounds of re-rating.  
2 Additionally, a number of indicators were proposed for merging and further refinement,  
3 particularly for perceived redundancies and in consideration for decreasing the total number of  
4 PC-QIs (for feasibility and concerns around indicator fatigue). Modifications were made to the  
5 PC-QIs required subsequent rounds of rating.

#### 6 Delphi Rounds 3 & 4

7 Remote ratings in rounds 3 and 4 continued as described in the first remote rating to obtain  
8 consensus for the modified/merged PC-QIs. Through the remote rounds, revisions of each PC-QI  
9 were added to the working document and circulated among panelists for a final rating using  
10 paper-based rating tools for final review. Prior to the third round of rating, a working group that  
11 created as a response to the discussions held during the face-to-face meeting, studied the  
12 development of an indicator that captures outcomes reported directly by the patients. This  
13 working group included five patients, two family members, one physician, two quality  
14 improvement leads and two researchers. The group worked on developing the indicator and  
15 gathering information to present background knowledge to the rest of panelists. The new  
16 indicator and additional information were shared among the rest of the panelists and they rated  
17 the new indicator in round 3. Proposed refinements to the PC-QIs during round 3 were agreed on  
18 during round 4 of rating, where panelists were also asked specifically about the necessity of each  
19 PC-QI, rating either a 'yes' or 'no' to keeping the indicator.

20  
21 *Appendix 1*, displays the ratings as median scores on a 9-point scale and interquartile range, as  
22 reported in previous studies [21, 24, 25], as well as details on modifications that were proposed  
23 by panelists. A flow chart of the rating process can be found in *Figure 2*.

FIGURE 2 HERE

## RESULTS

### Panel

A total of 29 people participated on the consensus panel. The consensus panel comprised:

- 8 patients and 3 caregivers (37.9%) with various experience with the health care system, including primary care, acute care, cancer care, and chronic diseases (e.g. cardiovascular conditions, diabetes, etc.)
- 5 members of diverse ethno-cultural communities (17.2%) who are also patients and/or caregivers
- 2 healthcare providers (6.9%; an internist and a pediatrician),
- 5 quality improvement experts (17.2%; representing Canadian Quality Councils and health systems, Cancer Care Ontario, University of Gothenburg Centre for Person-centred Care, Sweden, Picker Institute, and University of Oxford, UK),
- 4 PCC researchers (13.8%), including: a lead from the Patient-Centered Outcomes Research Institute (PCORI), a Senior Scientist Collaboration for Leadership in Applied Health Research and Care Oxford Unit, professors from Canadian Universities and leaders of the Canadian Strategy for Patient-Oriented Research
- 1 representative (3.4%) of the Canadian Institute for Health Information
- 1 representative (3.4%) from Ministry of Health, British Columbia

1  
2  
3 1 Of the 29 panelists, for round 2, 27 attended in person, 1 attended via videoconference and 1 was  
4  
5 2 absent (with this panelists comments shared with the panel). For rounds 3 and 4, 27 panelists  
6  
7 3 participated in the consensus, with two panelists not participating in this phase (one caregiver  
8  
9 4 and one clinician-researcher) due to conflicting commitments.  
10  
11  
12  
13  
14

## 15 6 Person-Centred Quality Indicators

16  
17 7 Thirty-nine PC-QIs were identified through Phase 1 and were refined through Phase 2 of the  
18  
19 8 study, where they were summarized into 26 final PC-QIs. These final 26 PC-QIs included seven  
20  
21 9 structure, 16 process, two outcome and one global indicator (*see Table 1*). During the first round  
22  
23 10 and based on final ratings (*see Table 1*), 4 indicators were discarded including:

- 24  
25  
26 11 • Timely Unplanned Readmission from ER
- 27  
28 12 • Overall Rating
- 29  
30 13 • Patient-reported Outcome Multi-attribute
- 31  
32 14 • Patient-reported Outcome Mental Health
- 33  
34  
35

36 15 Based on the decision to discard the last two PC-QIs, the working group proposed a new  
37  
38 16 indicator related to Patient-Reported Outcomes: “Using Patient-Reported Outcome Measures to  
39  
40 17 deliver Patient-Centred Care.” This newly proposed indicator was later rated and accepted in  
41  
42 18 Round 3. *Table 1* summarizes the consensus panel ratings as well as the sources of evidence for  
43  
44 19 each of the indicators. During Round 2, out of the initial 39 indicators, 11 were merged with  
45  
46 20 other indicators (*see Table 2*).  
47  
48  
49  
50  
51  
52  
53  
54  
55  
56  
57  
58  
59  
60



**Table 1:** Summary of Consensus Panel Ratings for Final 26 PC-QIs Developed by the Panel (Median Score on 9-point Scale and (Interquartile Range)) and Sources for Evidence

| Person-Centred Quality Indicators                                         | Round 1 Remote Panel Rating | Round 2 Face-to-Face Panel Rating | Round 3 Remote Panel Rating | Evidence Sources<br>SR = Scoping Review<br>ES = Environmental Scan<br>FGD = Focus Group Discussions<br>I = Interviews |
|---------------------------------------------------------------------------|-----------------------------|-----------------------------------|-----------------------------|-----------------------------------------------------------------------------------------------------------------------|
| <b>Structure Indicators (n= 7)</b>                                        |                             |                                   |                             |                                                                                                                       |
| Policy on Person-Centred Care                                             | 8 (6, 9)                    | Keep                              | 8 (7, 8)                    | SR, ES, FGD, I                                                                                                        |
| Educational Programs on Person-Centred care                               | 8 (7, 9)                    | Keep                              | 8 (7, 8)                    | SR, FGD, I                                                                                                            |
| Culturally Competent Care                                                 | 7 (6, 9)                    | Keep                              | 8 (7, 8)                    | SR, FGD                                                                                                               |
| Co-designing care in partnership with communities                         | 8 (6, 9)                    | Keep                              | 8 (7, 8)                    | FGD                                                                                                                   |
| Providing an Accommodating and Supportive Person-Centred Care Environment | 7 (5, 8)                    | Keep                              | 7 (6, 8)                    | SR, FGD                                                                                                               |
| Healthcare Information Technology to Support Person-Centred Care          | 8 (5, 9)                    | Keep                              | 8 (7, 8)                    | I                                                                                                                     |
| Structures to Report Person-Centred Care Performance                      | 8 (8, 9)                    | Keep                              | 8 (8, 9)                    | I                                                                                                                     |
| <b>Process Indicators (n=16)</b>                                          |                             |                                   |                             |                                                                                                                       |
| Compassionate Care                                                        | 9 (8, 9)                    | Keep                              | 8 (8, 9)                    | SR, FGD, I                                                                                                            |
| Equitable care                                                            | 8 (7, 9)                    | Keep                              | 9 (8, 9)                    | SR, FGD, I                                                                                                            |
| Trusting Relationship with Healthcare Provider                            | 9 (8, 9)                    | Keep                              | 8 (8, 9)                    | SR, FGD, I                                                                                                            |
| Timely Access to a Primary Care Provider                                  | 8 (7, 9)                    | Keep                              | 8 (6.5, 9)                  | ES, FGD                                                                                                               |
| Accessing Interpreter Services                                            | 8 (7, 9)                    | Keep                              | 8 (7, 9)                    | SR, FGD                                                                                                               |

|                                                                                 |               |                                                                   |          |                |
|---------------------------------------------------------------------------------|---------------|-------------------------------------------------------------------|----------|----------------|
| Communication with Healthcare System                                            | 8 (7, 9)      | Keep                                                              | 8 (8, 9) | SR, ES, FGD    |
| Communication between Patient and Healthcare Provider - Nurse                   | 8 (7.5, 9)    | Keep                                                              | 8 (8, 9) | SR, ES, FGD, I |
| Communication between Patient and Healthcare Provider - Physician               | 8 (8, 9)      | Keep                                                              | 9 (8, 9) | SR, ES, FGD, I |
| Information about Taking Medication                                             | 9 (7, 9)      | Keep                                                              | 8 (8, 9) | SR, ES, FGD    |
| Communicating Test Results                                                      | 8 (7, 9)      | Keep                                                              | 8 (8, 9) | SR, FGD        |
| Coordination of Care                                                            | 9 (7, 9)      | Keep                                                              | 8 (8, 9) | SR, ES, FGD    |
| Patient and Caregiver Involvement in Decisions about their Care and Treatment   | 8 (8, 9)      | Keep                                                              | 9 (8, 9) | SR, ES, FGD, I |
| Engaging Patients in Managing their Own Health                                  | 8 (7, 9)      | Keep                                                              | 8 (8, 9) | SR, ES, FGD, I |
| Patient Preparation for a Care Plan at a Healthcare Facility                    | 8 (7, 9)      | Keep                                                              | 8 (7, 9) | SR, ES, FGD    |
| Transition Planning                                                             | 9 (8, 9)      | Keep                                                              | 9 (8, 9) | FGD            |
| Using Patient-reported Outcome Measures (PROMs) to Deliver Patient-Centred Care | Not developed | Newly developed derived from previous 'Patient-reported outcomes' | 7 (5, 9) | Consensus      |
| <b>Outcome Indicators (n=2)</b>                                                 |               |                                                                   |          |                |
| Cost of Care- Affordability                                                     | 6.5 (5, 9)    | Keep                                                              | 7 (5, 9) | FGDs           |
| Overall Experience                                                              | 8 (6, 9)      | Keep                                                              | 9 (7, 9) | SR, ES         |
| <b>Global Indicator (n=1)</b>                                                   |               |                                                                   |          |                |
| Friends and Family Test                                                         | 7 (5, 9)      | 6.5 (2.5, 7)                                                      | 7 (6, 8) | ES             |

1  
2  
3  
4  
5  
6  
7  
8

**Table 2:** Merged PC-QIs

| Original PC-QIs                                                               | Final PC-QIs Incorporating Original PC-QIs                                |
|-------------------------------------------------------------------------------|---------------------------------------------------------------------------|
| <b>Structure</b>                                                              |                                                                           |
| Supporting a Workshop Committed to PCC                                        | Policy on PCC                                                             |
| Partnership with Communities                                                  |                                                                           |
| Protocol for integration of structures to support health technology           |                                                                           |
| Protocol addressing discriminatory care                                       | Educational Programs on PCC                                               |
| Program/protocol for recruitment and retention of staff of diverse background |                                                                           |
| Noise during hospitalization                                                  | Providing an Accommodating and Supportive Person-Centred Care Environment |
| Providing an Environment that Reflects Diversity and Inclusion                |                                                                           |
| Educational Programs Reflecting Cultural Competency and Humility              | Culturally Competent Care                                                 |
| <b>Process</b>                                                                |                                                                           |
| Post-discharge planning                                                       | Transition Planning                                                       |
| Timely follow-up after discharge                                              |                                                                           |
| Discharge summaries available after 48 hour of discharge from hospital        |                                                                           |

A complete summary of the final PC-QIs that were developed is available here:

[https://www.personcentredcareteam.com/s/PC-QIs\\_Monograph\\_Santana-et-al-2019.pdf](https://www.personcentredcareteam.com/s/PC-QIs_Monograph_Santana-et-al-2019.pdf) Each of these newly developed indicators are evidence-informed and person-centred, some addressing a specific aspect of healthcare quality (e.g. safety versus equity).

## DISCUSSION

As Moira Stewart stated in her 2001 editorial: “The patient should be the judge of patient-centred care.”[28] This article presents a new set of Person-Centred Quality Indicators (PC-QIs) developed and validated through a modified Delphi process that featured the patient perspective

1 on what matters most to them in their care. These PC-QIs are evidence-based and patient-  
2 informed, and widely applicable across healthcare sectors and contexts.

3  
4  
5  
6  
7  
8  
9  
10 The strength of this study is the person-centred approach used to develop metrics to evaluate  
11 PCC, which ensures that PCC is evaluated from the perspective of those who provide and receive  
12 care. To our knowledge, this is the first study to develop a generic set of PC-QIs using a rigorous  
13 evidence-based and person-centred approach, and involving the patient and caregiver throughout  
14 the research process – from inception to manuscript development. Using a highly participatory  
15 approach and a transformative lens, we sought to ensure the study was guided by the patient  
16 perspective, and that diverse and marginalized perspectives were reflected in the development of  
17 the PC-QIs. While PC-QIs were identified in the scoping review, first – the vast majority of these  
18 were not considered actual indicators in compliance with quality improvement agencies, such as  
19 the Agency for Healthcare Research and Quality (presented as units of measurement, such as  
20 percentage or proportion); second – many measures were not developed with significant patient  
21 input.[29] For instance, previous work conducted by Ouwens et al. in 2010 to develop a person-  
22 centred measures for cancer care involved patients in determining what would be important to  
23 measure.[30] The patient involvement was limited to semi-structured interviews to obtain the  
24 patient perspective on what guideline recommendations could be used for measuring PCC. In  
25 another study related to the development of measures for person-centred cancer care, Uphoff et  
26 al. 2012 involved patients as part of the consensus panel along with medical professionals.[31]  
27 While this work has been instrumental in demonstrating the value of the patient perspective in  
28 developing measures for PCC, only three patients were involved, out of fourteen experts on the  
29 panel. Issues around potential power imbalances were not accounted for. In our study, we strived

1 to have approximately half of our panelists comprised of patients, caregivers, and community  
2 members, to ensure a balance of perspectives. For most quality indicators that are developed,  
3 including those we identified in our environmental scan, PC-QIs tend to be developed based on  
4 what healthcare authorities, quality improvement experts, or researchers deem as most important  
5 for quality improvement. Patients and the public are seldom involved in decisions about quality  
6 of care despite being the ones who experience and receive care. How can PCC be truly improved  
7 if we continue to measure PCC without the patient perspective on what should be measured?  
8 These newly developed indicators present an opportunity to improve healthcare quality in ways  
9 that matter most to people. To drive changes in healthcare policy and practice, there is a need to  
10 develop and implement standardized ongoing mechanisms to measure and evaluate quality  
11 incorporating the patients' perspectives.[14]

12  
13 These PC-QIs offer a tremendous opportunity leverage ongoing initiatives to improve PCC by  
14 using data already being collected in many healthcare jurisdictions and helping to standardize the  
15 collection, use, and reporting of this data. This includes patient-reported experience measures  
16 (PREMs, such as Hospital Consumer Assessment of Health Providers and Systems) and patient-  
17 reported outcome measures (PROMs). Integrating PC-QIs into performance measurement  
18 frameworks can promote actionability for improving PCC. While PREMs and PROMs are often  
19 used at the provider level, there is little evidence of use for system-level applications and  
20 actionability. These indicators empower jurisdictions to monitor healthcare system performance  
21 and evaluate policy and practice related to PCC, while also including the patient's voice. Finally,  
22 the routinized use of standardized metrics, such PC-QIs, to evaluate PCC will help to strengthen  
23 the evidence-base for the PCC model.[32]

1  
2  
3 1  
4  
5 2 A key limitation of this research is that these indicators have yet to be operationalized and  
6  
7 3 evaluated in practice. It is only through empirical testing that the feasibility of data collection can  
8  
9 4 be determined and whether they meet the requirements of “good quality measures” – that are  
10  
11 5 acceptable, reliable, and valid.[33] Moreover, studying the implementation of the PC-QIs can  
12  
13 6 provide important insight into their effectiveness for promoting improvements in PCC as well as  
14  
15 7 patient experiences and outcomes. It is also important to identify any unintended consequences  
16  
17 8 as a result of PC-QI implementation, their use for benchmarking, and other issues, such as  
18  
19 9 workload and cost-effectiveness.[33] Additionally, while this method has generated these 26 PC-  
20  
21 10 QIs using a validated consensus method, they may not necessarily be universally applicable in all  
22  
23 11 countries and settings. Different cultural settings in different healthcare regulatory environments  
24  
25 12 may mean that different measures may be more appropriate for certain settings. Further work can  
26  
27 13 be done to tailor and adapt these PC-QIs, recognizing that a consideration of the local context  
28  
29 14 will ensure a more universal relevance.  
30  
31  
32  
33  
34  
35  
36  
37

38 16 Future steps for this work include an assessment of the feasibility of implementing these PC-QIs.  
39  
40 17 Secondly, we plan to pilot the use of the PC-QIs in national and international jurisdictions to  
41  
42 18 promote PCC and to evaluate of the use of these measures for improving healthcare quality of  
43  
44 19 care from the perspectives of the patient.  
45  
46  
47

## 48 20 **CONCLUSIONS**

49  
50  
51 21 In conclusion, the development of these newly developed evidence-based and person-informed  
52  
53 22 PC-QIs represent an important contribution towards efforts to measure and improve person-  
54  
55 23 centred care. While these indicators have yet to be evaluated, the PC-QIs are available tools that  
56  
57  
58  
59  
60

1 healthcare systems can use to monitor and evaluate the delivery of PCC, identify the gaps, and  
2 make the changes needed to improve the quality of care. Importantly, these indicators have the  
3 potential to shift our healthcare systems towards a new paradigm for assessing quality by  
4 ensuring we measure what matters most to patients

## 6 **Acknowledgements**

7 The authors are thankful for the contributions and support to this project by Dr. V. Yiu, Dr. G.  
8 Teare, Dr. K Wittmeier, Dr. M. O’Beirne, Dr. N. Jette, Dr. M. Lu, Dr. T. Sajobi, Dr. D.  
9 Lorenzetti, D. LeLievre, L. Cuthbertson, and members of the consensus panel. The authors thank  
10 the investigators, collaborators, and partners of the Person-Centred Care Quality Indicators  
11 Study, as well as the research team, who supported data collection and analysis for the consensus  
12 process, including: Sadia Ahmed, Chelsea Doktorchik, Ashton Chugh, and Bijan Mohamed. The  
13 authors would also like extend their gratitude to Dr. Gwen McGhan for her role in facilitating the  
14 consensus process, and all of the patients, caregivers, community members, healthcare providers,  
15 and researchers who participated in the consensus. The authors would also like to acknowledge  
16 Brian Steele, for his support with the submission of this article.

## References

- 1 OECD. Health Ministerial Statement - The next generation of health reforms. Published January 17 2017; accessed November 2019. <http://www.oecd.org/health/ministerial/ministerial-statement-2017.pdf>.
- 2 Coulter, A. Measuring what matters to patients. *BMJ* 2017;356:j816.
- 3 Institute of Medicine. Crossing the quality chasm: A new health system for the 21st century. Washington (DC): National Academies Press:2001.
- 4 Pelzang R. Time to learn: Understanding patient-centred care. *Br J Nurs* 2010;19:912-7.
- 5 National Department of Health - National Health Service. NHS 2010-2015: From Good to Great. Preventative, People-Centred, Productive. 2009.
- 6 Davis K, Schoenbaum SC, Audet AM. A 2020 vision of patient-centered primary care. *J Gen Intern Med* 2005;20:953-7.
- 7 Alberta Health Services. The Patient First Strategy. 2015.
- 8 Stoelwinder JU. Final report of the National Health and Hospitals Reform Commission: will we get the health care governance reform we need? *Med J Aust* 2009;191:387-8.
- 9 World Health Organization. Leading and Managing Change towards People-Centred and Integrated Health Services. 2015.
- 10 Santana MJ, Manalili K, Jolley RJ, et al. How to practice person-centred care: A conceptual framework. *Health Expect* 2018;21:429-40.
- 11 Stewart M, Brown JB, Donner A, et al. The impact of patient-centered care on outcomes. *J Fam Pract* 2000;49:796-804.
- 12 McMillan SS, Kendall E, Sav A, et al. Patient-centered approaches to health care: a systematic review of randomized controlled trials. *Med Care Res Rev* 2013;70:567-96.
- 13 Mead N, Bower P. Patient-centred consultations and outcomes in primary care: a review of the literature. *Patient Educ Couns* 2002;48:51-61.
- 14 Berwick DM, Nolan TW, Whittington J. The triple aim: care, health, and cost. *Health Aff* 2008;27:759-69.
- 15 Jones J, Hunter D. Consensus methods for medical and health services research. *Br Med J* 1995;311:376.
- 16 Mertens DM, Holmes HM, Harris RL. Transformative research and ethics. In: Mertens DM, Ginsberg, PE eds. *The Handbook of Social Research Ethics*. Sage Publications: Thousand Oaks, CA. 2009:85-101.
- 17 Donabedian A. Evaluating the quality of medical care. *Milbank Q* 1966;44:166-206.
- 18 Jolley RJ, Lorenzetti DL, Manalili K, et al. Protocol for a scoping review study to identify and classify patient-centred quality indicators. *BMJ Open* 2017;7:e013632.
- 19 Santana MJ, Ahmed S, Lorenzetti D, et al. Measuring patient-centred system performance: a scoping review of patient-centred care quality indicators. *BMJ Open* 2019;9:e023596.
- 20 Doktorchik C, Manalili K, Jolley R, et al. Identifying Canadian patient-centred care measurement practices and quality indicators: a survey. *CMAJ Open* 2018;6:e643.
- 21 Fitch K, Bernstein SJ, Aguilar MD, Burnand B, LaCalle JR. The RAND/UCLA appropriateness method user's manual. RAND CORP: Santa Monica, CA; 2001.
- 22 McKenzie E, Potestio ML, Boyd JM, et al. Reconciling patient and provider priorities for improving the care of critically ill patients: a consensus method and qualitative analysis of decision making. *Health Expect* 2017;20:1367-74.



- 1 23 Stelfox HT, Straus SE. Measuring quality of care: considering conceptual approaches to  
2 quality indicator development and evaluation. *J Clin Epidemiol* 2013;66:1328-37.
- 3 24 Stelfox HT, Khandwala F, Kirkpatrick AW, Santana MJ. Trauma center volume and quality  
4 improvement programs. *J Trauma Acute Care Surg* 2012;72:962-8.
- 5 25 Santana MJ, Stelfox HT. Development and evaluation of evidence-informed quality  
6 indicators for adult injury care. *Ann Surg* 2014;259:186-92.
- 7 26 Dimick JB. What makes a “good” quality indicator?: comment on “Quality indicators for  
8 evaluating trauma care”. *Archives of Surgery*. 2010 Mar 1;145(3):295.
- 9 27 The Joint Commission. Attributes of Core Performance Measures and Associated Evaluation  
10 Criteria. 2010.
- 11 28 Stewart M. Towards a global definition of patient centred care: the patient should be the judge  
12 of patient centred care. *BMJ* 2001;322:444-5.
- 13 29 Agency for Healthcare Research and Quality. Quality Improvement and monitoring at your  
14 fingertips. Secondary Quality Improvement and monitoring at your fingertips. [https://www.  
15 qualityindicators.ahrq.gov/](https://www.qualityindicators.ahrq.gov/) (Accessed 01 Oct 2017).
- 16 30 Ouwens M, Hermens R, Hulscher M, Vonk-Okhuijsen S, Tjan-Heijnen V, Termeer R, Marres  
17 H, Wollersheim H, Grol R. Development of indicators for patient-centred cancer care. *Support  
18 Care Cancer*. 2010 Jan 1;18(1):121.
- 19 31 Uphoff EP, Wennekes L, Punt CJ, Grol RP, Wollersheim HC, Hermens RP, Ottevanger PB.  
20 Development of generic quality indicators for patient-centered cancer care by using a RAND  
21 modified Delphi method. *Cancer Nurs*. 2012 Jan 1;35(1):29-37.
- 22 32 Montague T, Gogovor A, Ayles J, et al. Patient-Centred Care in Canada: Key Components  
23 and the Path Forward. *Healthc Q* 2017;20:50-6.
- 24 33 Grol R, Wensing M, Eccles M, Davis D, Editors. Improving patient care: the implementation  
25 of change in health care. John Wiley & Sons; 2013.

1  
2  
3 **Figure 1 Legend:** Figure 1 shows an overview of the program of research on Developing  
4 Person-Centred Quality Indicators (PC-QIs). The program of research includes three phases of  
5 research: Identifying and Developing PC-QIs; refinement of the PC-QIs, and feasibility of  
6 assessment of the newly developed PC-QIs. This manuscript shows the final results (final set  
7 PC-QIs), based on research from the first two phases.  
8  
9

10 **Figure 2 Legend:** Figure 2 shows a flow chart of the PC-QI Delphi process, describing the  
11 timeline for Rounds alongside the numbers of PCQIs surviving each round. There are arrows  
12 pointing down from “39 PCQIs evaluated” to each subsequent “*n* PCQIs evaluated” box, until  
13 the final “26 PCQIs evaluated” box.  
14  
15  
16  
17  
18  
19  
20  
21  
22  
23  
24  
25  
26  
27  
28  
29  
30  
31  
32  
33  
34  
35  
36  
37  
38  
39  
40  
41  
42  
43  
44  
45  
46  
47  
48  
49  
50  
51  
52  
53  
54  
55  
56  
57  
58  
59  
60

For peer review only

1  
2  
3  
4  
5  
6  
7  
8  
9  
10  
11  
12  
13  
14  
15  
16  
17  
18  
19  
20  
21  
22  
23  
24  
25  
26  
27  
28  
29  
30  
31  
32  
33  
34  
35  
36  
37  
38  
39  
40  
41  
42  
43  
44  
45  
46  
47

Figure 1: Study at a Glance

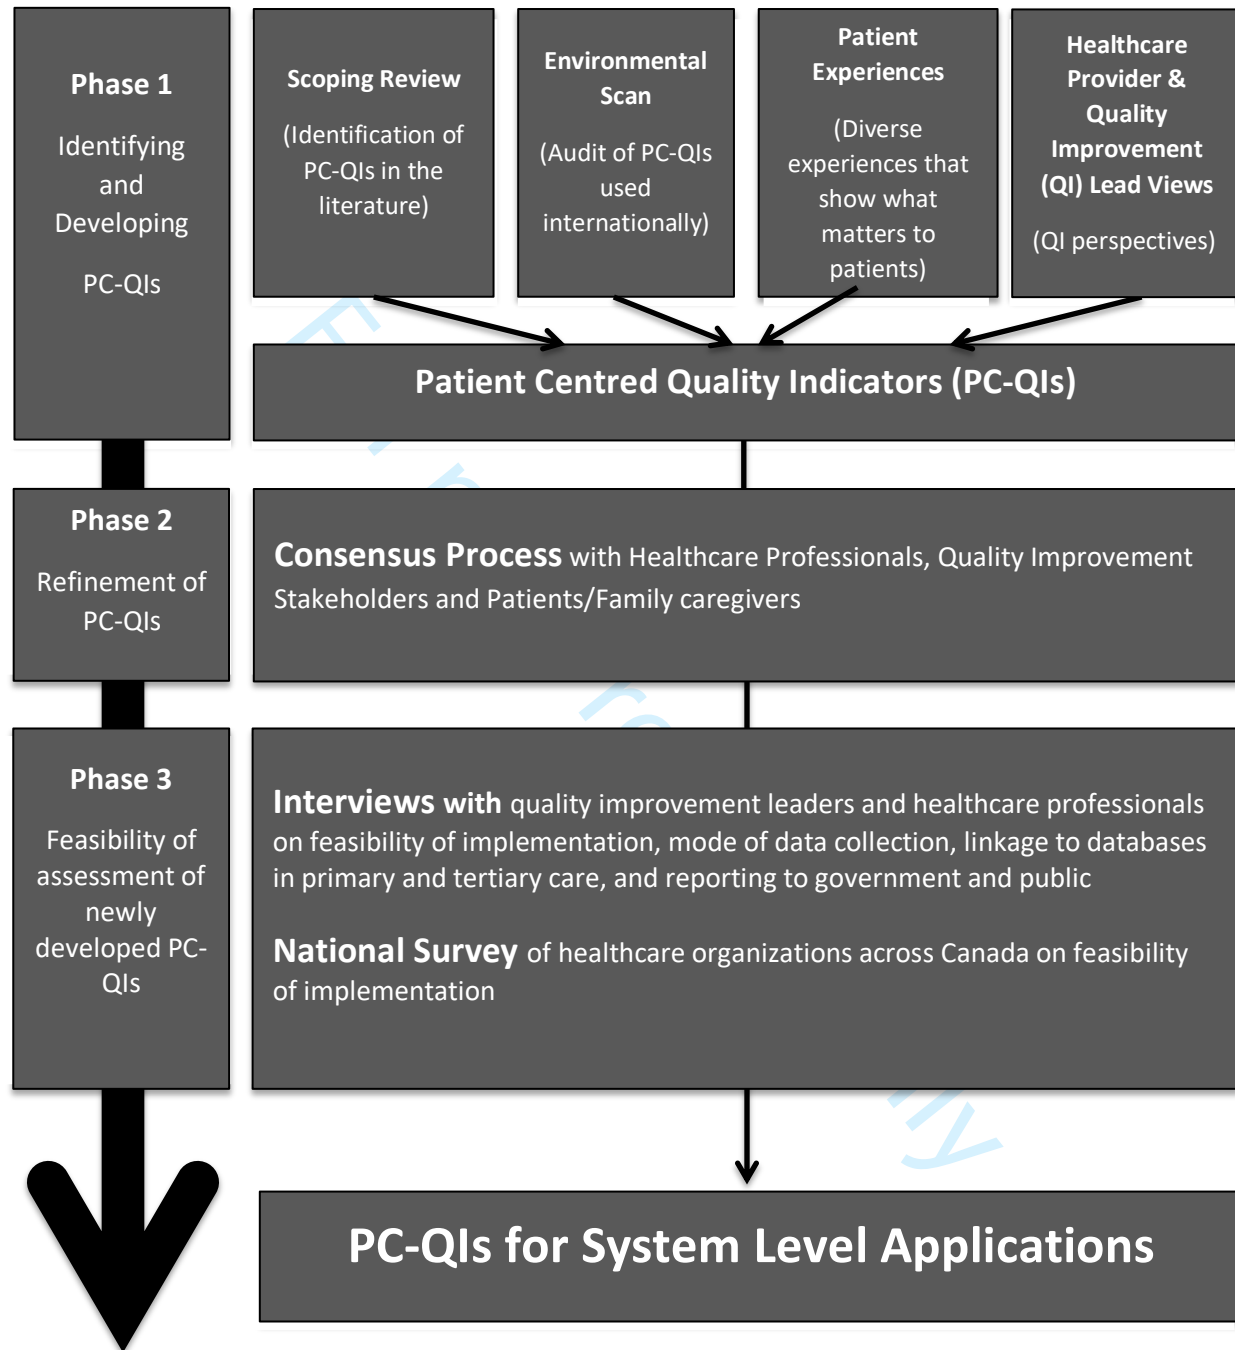

Figure 1 shows an overview of the program of research on *Developing Person-Centred Quality Indicators (PC-QIs)*. The program of research includes three phases of research: Identifying and Developing PC-QIs; refinement of the PC-QIs, and feasibility of assessment of the newly developed PC-QIs. This manuscript shows the final results (final set PC-QIs), based on research from the first two phases.

Figure 2: Flow Chart of PC-QI Delphi Process (Ratings and Modifications)

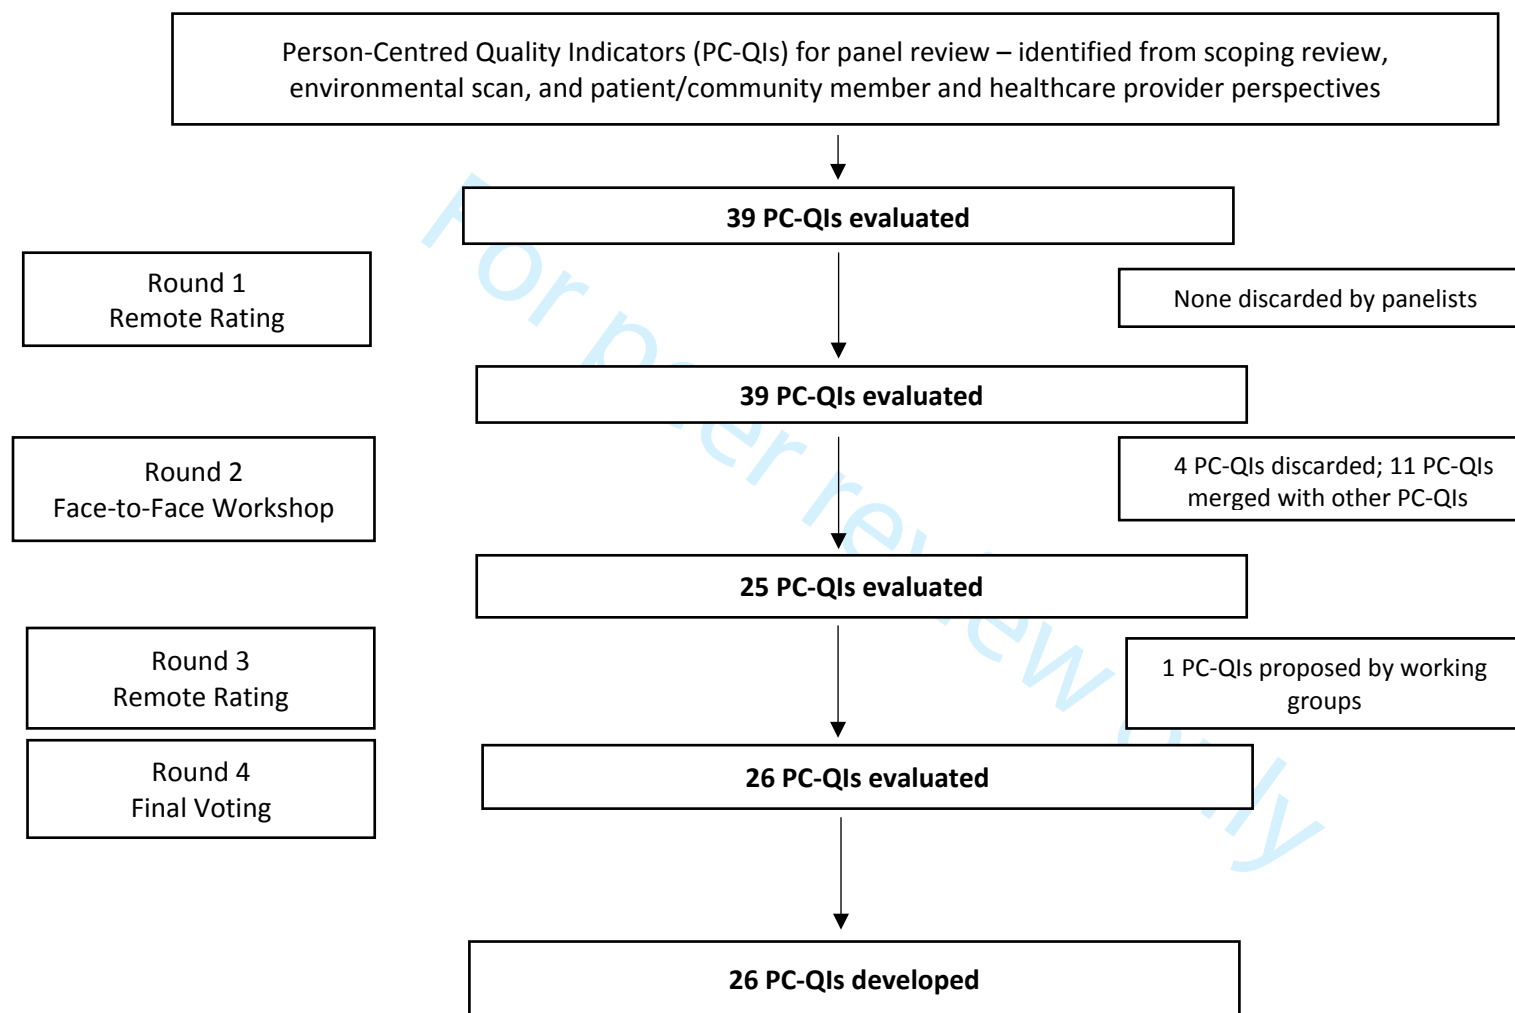

Figure 2 shows a flow chart of the PC-QI Delphi process, describing the timeline for Rounds alongside the numbers of PCQIs surviving each round. There are arrows pointing down from "39 PCQIs evaluated" to each subsequent "n PCQIs evaluated" box, until the final "26 PCQIs evaluated" box.

1  
2  
3  
4  
5  
6  
7  
8  
9  
10  
11  
12  
13  
14  
15  
16  
17  
18  
19  
20  
21  
22  
23  
24  
25  
26  
27  
28  
29  
30  
31  
32  
33  
34  
35  
36  
37  
38  
39  
40  
41  
42  
43  
44  
45  
46  
47  
48  
49  
50  
51  
52  
53  
54  
55  
56  
57  
58  
59  
60

For peer review only

**Appendix 1:** Summary of Ratings [median score on 9-point scale and interquartile range (IQR)] and Modifications for PC-QIs Rated and Revised (PC-QIs = 39)

| Initial Person-Centred Quality Indicators                                 | Round 1 Remote Panel Rating Median Score on 9-point Scale (IQR) | Round 2 Face-to-Face Panel Rating Median Score on 9-point Scale (IQR) – as applicable for disagreement<br>*initially rated as Keep/Discard | Round 2 Modifications                                     | Round 3 Remote Panel Rating Median Score on 9-point Scale (IQR) | Round 3 Modifications   | Round 4 Final Remote Panel Rating – Keep/Discard |
|---------------------------------------------------------------------------|-----------------------------------------------------------------|--------------------------------------------------------------------------------------------------------------------------------------------|-----------------------------------------------------------|-----------------------------------------------------------------|-------------------------|--------------------------------------------------|
| <b>Structure Indicators</b>                                               |                                                                 |                                                                                                                                            |                                                           |                                                                 |                         |                                                  |
| Policy on Person-Centred Care                                             | 8 (6, 9)                                                        | Keep                                                                                                                                       | Expanded on description                                   | 8 (7, 8)                                                        | None                    | Keep                                             |
| Educational Programs on Person-Centred care                               | 8 (7, 9)                                                        | Keep                                                                                                                                       | Expanded on description                                   | 8 (7, 8)                                                        | Expanded on description | Keep                                             |
| Protocol addressing Discriminatory Care                                   | 7.5 (6, 9)                                                      | Keep                                                                                                                                       | Merged with “Educational Programs on Person-Centred Care” | N/A                                                             | N/A                     | N/A                                              |
| Protocol Addressing Cultural Competence                                   | 7 (6, 9)                                                        | Keep                                                                                                                                       | Changed wording to “Culturally Competent Care”            | 8 (7, 8)                                                        | Expanded on definition  | Keep                                             |
| Educational Programs reflecting Cultural Competency and Cultural Humility | 7 (6, 9)                                                        | Keep                                                                                                                                       | Merged with “Culturally Competent Care”                   | N/A                                                             | N/A                     | N/A                                              |

|                                                                                |            |              |                                                                                              |          |                                                        |      |
|--------------------------------------------------------------------------------|------------|--------------|----------------------------------------------------------------------------------------------|----------|--------------------------------------------------------|------|
| Program/Protocol for recruitment and retention of staff of diverse backgrounds | 8 (5.5, 9) | Keep         | Merged with "Educational Programs on Person-Centred Care"                                    | N/A      | N/A                                                    | N/A  |
| Supporting a Workforce Committed to Person-Centred Care                        | 7 (4, 9)   | Disagreement | Merged with "Policy on Person-Centred Care"                                                  | N/A      | N/A                                                    | N/A  |
| Providing a Supportive and Accommodating Person-Centred Care Environment       | 7 (5, 8)   | Keep         | Clarified language in description                                                            | 7 (6, 8) | None                                                   | Keep |
| Providing an Environment that Reflects Diversity and Inclusion                 | 8 (5, 9)   | Keep         | Merged with "Providing a Supportive and Accommodating Person-Centred Care Environment"       | N/A      | N/A                                                    | N/A  |
| Partnership with Communities                                                   | 8 (6, 9)   | Keep         | Expanded description; changed wording to "Co-designing care in partnership with communities" | 8 (7, 8) | Components merged with "Policy on Person-Centred Care" | Keep |
| Protocol for the Integration of                                                | 8 (5, 9)   | Keep         | Expanded description;                                                                        | 8 (6, 8) | Components merged with                                 | N/A  |



|                                                      |          |      |                                                                                       |          |                                 |      |
|------------------------------------------------------|----------|------|---------------------------------------------------------------------------------------|----------|---------------------------------|------|
| Structures to Support Health Information Technology  |          |      | changed working to “Healthcare Information Technology to Support Person-Centred Care” |          | “Policy on Person-Centred Care” |      |
| Structures to Report Person-Centred Care Performance | 8 (8, 9) | Keep | Changes to description of data source                                                 | 8 (8, 9) | None                            | Keep |
| <b>Process Indicators</b>                            |          |      |                                                                                       |          |                                 |      |
| Compassionate Care                                   | 9 (8, 9) | Keep | Broadening of definition, providing example measures                                  | 8 (8, 9) | None                            | Keep |
| Equitable care                                       | 8 (7, 9) | Keep | Broadening of definition, providing example measures                                  | 9 (8, 9) | Expanded definition             | Keep |
| Trusting Relationship with Healthcare Provider       | 9 (8, 9) | Keep | Broadening of definition, providing example measures                                  | 8 (8, 9) | None                            | Keep |
| Accessing Interpreter Services                       | 8 (7, 9) | Keep | Broadening of definition, providing example measures                                  | 8 (7, 9) | None                            | Keep |

|                                                                   |            |      |                                                                    |          |                                                                     |      |
|-------------------------------------------------------------------|------------|------|--------------------------------------------------------------------|----------|---------------------------------------------------------------------|------|
| Communication with Healthcare System                              | 8 (7, 9)   | Keep | Broadening of definition, providing example measures               | 8 (8, 9) | Example items from measure included                                 | Keep |
| Communication between Patient and Healthcare Provider - Nurse     | 8 (7.5, 9) | Keep | Broadening of definition                                           | 8 (8, 9) | Edits to example measures                                           | Keep |
| Communication between Patient and Healthcare Provider - Physician | 8 (8, 9)   | Keep | Broadening of definition                                           | 9 (8, 9) | Edits to example measures                                           | Keep |
| Information about Taking Medication                               | 9 (7, 9)   | Keep | Expanded on description                                            | 8 (8, 9) | Expanded description                                                | Keep |
| Communicating Test Results                                        | 8 (7, 9)   | Keep | Expanded on description; providing example measures                | 8 (8, 9) | None                                                                | Keep |
| Coordinating Your Care                                            | 9 (7, 9)   | Keep | Expanded on description; changed wording to "Coordination of Care" | 8 (8, 9) | Expanded on definition                                              | Keep |
| Patient Involvement in Decisions About Their Care and Treatment   | 8 (8, 9)   | Keep | Broadening of definition                                           | 9 (8, 9) | Changed wording to "Patient and Caregiver Involvement in Decisions" | Keep |

|                                                          |            |         |                                                                                                       |            |                                 |      |
|----------------------------------------------------------|------------|---------|-------------------------------------------------------------------------------------------------------|------------|---------------------------------|------|
|                                                          |            |         |                                                                                                       |            | about Their Care and Treatment” |      |
| Engaging Patients in Managing their Own Health           | 8 (7, 9)   | Keep    | Clarification of self-management                                                                      | 8 (8, 9)   | Expanded on definition          | Keep |
| Timely Access to a Primary Care Provider                 | 8 (7, 9)   | Keep    | None                                                                                                  | 8 (6.5, 9) | None                            | Keep |
| Patient preparation for a planned admission to hospital  | 8 (7, 9)   | Keep    | Broadening of definition and wording changed to “Patient Preparation for a Planned Treatment Program” | 8 (7, 9)   | None                            | Keep |
| Time to Unplanned Admission Through Emergency Department | 7.5 (6, 9) | Discard | Discarded by panel                                                                                    | N/A        | N/A                             | N/A  |
| Discharge Planning                                       | 9 (8, 9)   | Keep    | Change focus from discharge to continuum of care; wording changed to “Transition Planning”            | 9 (8, 9)   | Edits to example measures       | Keep |

|                                                                                                                                                                                                                                                                               |                                                                                       |              |          |                                                                                        |          |                      |      |
|-------------------------------------------------------------------------------------------------------------------------------------------------------------------------------------------------------------------------------------------------------------------------------|---------------------------------------------------------------------------------------|--------------|----------|----------------------------------------------------------------------------------------|----------|----------------------|------|
| 1<br>2<br>3<br>4<br>5<br>6<br>7<br>8<br>9<br>10<br>11<br>12<br>13<br>14<br>15<br>16<br>17<br>18<br>19<br>20<br>21<br>22<br>23<br>24<br>25<br>26<br>27<br>28<br>29<br>30<br>31<br>32<br>33<br>34<br>35<br>36<br>37<br>38<br>39<br>40<br>41<br>42<br>43<br>44<br>45<br>46<br>47 | Post-Discharge Planning                                                               | 8 (7, 9)     | Keep     | Merged with "Transition Planning"                                                      | N/A      | N/A                  | N/A  |
|                                                                                                                                                                                                                                                                               | Timely Follow-up with Hospital Discharged Patients                                    | 8 (5, 9)     | Keep     | Merged with "Transition Planning"                                                      | N/A      | N/A                  | N/A  |
|                                                                                                                                                                                                                                                                               | Discharge Summaries Available to Community Care Provider Within 48 Hours of Discharge | 8 (7, 9)     | Keep     | Merged with "Transition Planning"                                                      | N/A      | N/A                  | N/A  |
|                                                                                                                                                                                                                                                                               | Noise During Hospitalization/Stay                                                     | 7 (6, 8)     | Keep     | Merged with "Providing a supportive and accommodating person-centred care environment" | N/A      | N/A                  | N/A  |
|                                                                                                                                                                                                                                                                               | <b>Outcome Indicators</b>                                                             |              |          |                                                                                        |          |                      |      |
|                                                                                                                                                                                                                                                                               | Overall Rating                                                                        | 7.5 (5, 8.5) | Discard  | Discarded by panel                                                                     | N/A      | N/A                  | N/A  |
|                                                                                                                                                                                                                                                                               | Overall Experience                                                                    | 8 (6, 9)     | Keep     | None                                                                                   | 9 (7, 9) | Expanded description | Keep |
|                                                                                                                                                                                                                                                                               | Cost of Care-Affordability                                                            | 6.5 (5, 9)   | Keep     | None                                                                                   | 7 (5, 9) | None                 | Keep |
|                                                                                                                                                                                                                                                                               | Patient-Reported Outcomes – General Health                                            | 7 (5, 9)     | 2 (1, 4) | Discarded by panel; agreed to discuss in working group                                 | 7 (5, 9) | None                 | Keep |

|                                             |          |              |                    |          |      |      |
|---------------------------------------------|----------|--------------|--------------------|----------|------|------|
| Patient-reported Outcomes – Multi-attribute | 7 (5, 8) | Discard      | Discarded by panel | N/A      | N/A  | N/A  |
| Patient Reported Outcomes- Mental Health    | 7 (5, 9) | Discard      | Discarded by panel | N/A      | N/A  | N/A  |
| <b>Global Indicator (n=1)</b>               |          |              |                    |          |      |      |
| Friends and Family Test                     | 7 (5, 9) | 6.5 (2.5, 7) | None               | 7 (6, 8) | None | Keep |

# BMJ Open

## Improving the Quality of Person-Centred Healthcare from the Patient Perspective: Development of Person-Centred Quality Indicators

|                                 |                                                                                                                                                                                                                                                                                                                                                                                                                                                                                                                                                                                                                                                                                                                                                                |
|---------------------------------|----------------------------------------------------------------------------------------------------------------------------------------------------------------------------------------------------------------------------------------------------------------------------------------------------------------------------------------------------------------------------------------------------------------------------------------------------------------------------------------------------------------------------------------------------------------------------------------------------------------------------------------------------------------------------------------------------------------------------------------------------------------|
| Journal:                        | <i>BMJ Open</i>                                                                                                                                                                                                                                                                                                                                                                                                                                                                                                                                                                                                                                                                                                                                                |
| Manuscript ID                   | bmjopen-2020-037323.R2                                                                                                                                                                                                                                                                                                                                                                                                                                                                                                                                                                                                                                                                                                                                         |
| Article Type:                   | Original research                                                                                                                                                                                                                                                                                                                                                                                                                                                                                                                                                                                                                                                                                                                                              |
| Date Submitted by the Author:   | 07-Oct-2020                                                                                                                                                                                                                                                                                                                                                                                                                                                                                                                                                                                                                                                                                                                                                    |
| Complete List of Authors:       | Santana, Maria-Jose; University of Calgary, Community Health Sciences Manalili, Kimberly; University of Calgary Cumming School of Medicine, Community Health Sciences<br>Zelinsky, Sandra; University of Calgary Cumming School of Medicine<br>Brien, Susan; Health Quality Ontario<br>Gibbons, Elizabeth; Oxford University<br>King, Jenny; Picker Institute Europe<br>Frank, Lori; Patient-Centered Outcomes Research Institute<br>Wallström, Sara; Center for Person Centered Care; University of Gothenburg<br>Fairie, Paul; University of Calgary<br>Leeb, Kira; Victorian Agency for Health Information<br>Quan, Hude; University of Calgary, Department of Community Health Sciences<br>Sawatzky, Richard; Trinity Western University School of Nursing |
| <b>Primary Subject Heading</b>: | Patient-centred medicine                                                                                                                                                                                                                                                                                                                                                                                                                                                                                                                                                                                                                                                                                                                                       |
| Secondary Subject Heading:      | Health services research                                                                                                                                                                                                                                                                                                                                                                                                                                                                                                                                                                                                                                                                                                                                       |
| Keywords:                       | Quality in health care < HEALTH SERVICES ADMINISTRATION & MANAGEMENT, Organisation of health services < HEALTH SERVICES ADMINISTRATION & MANAGEMENT, Health policy < HEALTH SERVICES ADMINISTRATION & MANAGEMENT                                                                                                                                                                                                                                                                                                                                                                                                                                                                                                                                               |
|                                 |                                                                                                                                                                                                                                                                                                                                                                                                                                                                                                                                                                                                                                                                                                                                                                |

SCHOLARONE™  
Manuscripts



I, the Submitting Author has the right to grant and does grant on behalf of all authors of the Work (as defined in the below author licence), an exclusive licence and/or a non-exclusive licence for contributions from authors who are: i) UK Crown employees; ii) where BMJ has agreed a CC-BY licence shall apply, and/or iii) in accordance with the terms applicable for US Federal Government officers or employees acting as part of their official duties; on a worldwide, perpetual, irrevocable, royalty-free basis to BMJ Publishing Group Ltd ("BMJ") its licensees and where the relevant Journal is co-owned by BMJ to the co-owners of the Journal, to publish the Work in this journal and any other BMJ products and to exploit all rights, as set out in our [licence](#).

The Submitting Author accepts and understands that any supply made under these terms is made by BMJ to the Submitting Author unless you are acting as an employee on behalf of your employer or a postgraduate student of an affiliated institution which is paying any applicable article publishing charge ("APC") for Open Access articles. Where the Submitting Author wishes to make the Work available on an Open Access basis (and intends to pay the relevant APC), the terms of reuse of such Open Access shall be governed by a Creative Commons licence – details of these licences and which [Creative Commons](#) licence will apply to this Work are set out in our licence referred to above.

Other than as permitted in any relevant BMJ Author's Self Archiving Policies, I confirm this Work has not been accepted for publication elsewhere, is not being considered for publication elsewhere and does not duplicate material already published. I confirm all authors consent to publication of this Work and authorise the granting of this licence.

# Improving the Quality of Person-Centred Healthcare from the Patient Perspective: Development of Person-Centred Quality Indicators

## Authorship:

Santana MJ, Manalili K, Zelinsky S, Brien S, Gibbons E, King J, Frank L, Wallström S, Fairie P, Leeb K, Quan H, Sawatzky R

## Affiliations:

Santana MJ, MPharm, PhD, Departments of Paediatrics and Community Health Sciences, Cumming School of Medicine, University of Calgary, Calgary, Alberta, Canada

Manalili K, MPH, PhD Candidate, Department of Community Health Sciences, University of Calgary, Calgary, Alberta, Canada

Zelinsky S, Patient-Partner, Community Health Sciences, Cumming School of Medicine, University of Calgary, Calgary, Alberta, Canada

Brien S, PhD, Health Quality Ontario, Toronto, Ontario, Canada

Gibbons E, MSc, Health Services Research Unit, Nuffield Department of Population Health, University of Oxford, England, UK

King J, MSc, Picker Institute Europe, Oxford, England, UK

Frank L, PhD, Patient-Centered Outcomes Research Institute (PCORI), Washington, US

Wallström S, PhD, Centre for Person-Centred Care (GPCC), Gothenburg, Sweden. Institute of Health and Care Sciences, Sahlgrenska Academy, University of Gothenburg, Gothenburg, Sweden.

Fairie P, PhD, Department of Community Health Sciences, Cumming School of Medicine, University of Calgary, Calgary, Alberta, Canada

Leeb K\*, MA, BA, Executive Director, Health and System Performance, Victorian Agency for Health Information, Melbourne, Australia.

Quan H, PhD, Community Health Sciences, Cumming School of Medicine, University of Calgary, Calgary, Alberta, Canada

Sawatzky R, PhD, RN, Trinity Western University School of Nursing, British Columbia, Canada



1  
2  
3  
4  
5  
6  
7  
8  
9  
10  
11  
12  
13  
14  
15  
16  
17  
18  
19  
20  
21  
22  
23  
24  
25  
26  
27  
28  
29  
30  
31  
32  
33  
34  
35  
36  
37  
38  
39  
40  
41  
42  
43  
44  
45  
46  
47  
48  
49  
50  
51  
52  
53  
54  
55  
56  
57  
58  
59  
60

1  
2 \*Kira Leeb was the former Director of Health System Performance at the Canadian Institute for  
3 Health Information at the start of the project in 2015.

4  
5 **Article Information**

6  
7 Corresponding Author: Maria J. Santana MPharm, PhD, Departments of Paediatrics and  
8 Community Health Sciences, Cumming School of Medicine, University of Calgary & Patient  
9 Engagement Lead – Alberta Strategy for Patient Oriented Research. 3280 Hospital Drive NW,  
10 Teaching Research and Wellness Building (3E-45, Foothills Campus, University of Calgary,  
11 Calgary, Alberta ([mjsantan@ucalgary.ca](mailto:mjsantan@ucalgary.ca)).

For peer review only

## ABSTRACT

**Importance:** International efforts are being made towards a person-centered care (PCC) model, but there are currently no standardized mechanisms to measure and monitor PCC at a healthcare system level. The use of metrics to measure PCC can help to drive the changes needed to improve the quality of healthcare that is person-centred.

**Objective:** To develop and validate person-centred care quality indicators (PC-QIs) measuring PCC at a healthcare system level through a synthesis of the evidence and a person-centred consensus approach to ensure the PC-QIs reflect what matters most to people in their care.

**Methods:** Existing indicators were first identified through a scoping review of the literature, and an international environmental scan. Focus group discussions with diverse patients and caregivers, and interviews with clinicians and experts in quality improvement allowed us to identify gaps in current measurement of PCC and inform the development of new PC-QIs. A set of identified and newly developed PC-QIs were subsequently refined by Delphi consensus process using a modified RAND/UCLA Appropriateness Method. The international consensus panel consisted of patients, family members, community representatives, clinicians, researchers, and healthcare quality experts.

**Results:** From an initial 39 unique evidence-based PC-QIs identified and developed, the consensus process yielded 26 final PC-QIs. These included seven related to structure, 16 related to process, two related to outcome and one overall global PC-QI.

1 **Conclusions:** The final 26 evidence-based and person-informed PC-QIs can be used to measure  
2 and evaluate quality incorporating patient perspectives, empowering jurisdictions to monitor  
3 healthcare system performance and evaluate policy and practice related to PCC.

#### 4 **Article Summary**

##### **Strengths and limitations**

- The development of the Person-Centred Quality Indicators (PC-QIs) was conducted using a multi-phased rigorous scientific process in collaboration with an international team of experts.
- The development of the indicators followed the National Quality Forum's criteria for "good quality indicators."
- The perspectives of diverse patients, caregivers, and community members were incorporated into the development of the PC-QIs, as well as healthcare providers and quality improvement experts.
- The study did not include an evaluation of PC-QI implementation.

## INTRODUCTION

In 2017, health ministers from OECD countries declared that we need to invest in measuring what matters most to patients[1,2]. Ever since patient-centred care (PCC) was first identified as a foundational component of healthcare quality and patient safety by the Institute of Medicine in 2001[3], it has been recognized as a high priority by healthcare systems globally.[4-8] The use of valid and reliable measures to monitor and evaluate PCC can provide the data needed to identify gaps in the delivery of PCC and target areas for improvement, and thus, drive the changes needed to move towards a true PCC model.

However, there are currently no generally accepted indicators for measuring PCC.[9] Moreover, existing indicators do not tend to incorporate the voices of people involved in healthcare, namely, patients, caregivers, and healthcare providers.[10] This gap means that PCC itself might be measured in ways not relevant to patients, and in ways that do not address practical concerns of healthcare providers for person-centred quality improvement.

Evidence also suggests that the delivery of PCC improves healthcare quality, including improvement of patient experiences and outcomes, enhanced involvement of people in their own healthcare decisions, more support for health promotion activities, a decrease in healthcare services utilization and costs, and an improvement in healthcare provider satisfaction.[11-14]

The overall aim of this research was to ensure that the patient perspective can be used to inform improvements in healthcare quality at the system level by developing a core group of person-

1 centred quality indicators (PC-QIs), based on a synthesis of the evidence and, importantly,  
2 includes what matters to patients, caregivers, diverse community members, healthcare providers  
3 and quality improvement experts, and researchers, when it comes to healthcare.

## 4

## 5 **METHODS**

6 This study was part of a multi-phased programme of research to develop, implement, and  
7 evaluate PC-QIs for measuring and improving PCC (See *Figure 1 – Study at a glance*). The  
8 development of the PC-QIs included two phases. During Phase 1, previously implemented and  
9 evaluated PC-QIs were identified and classified using a published PCC framework.[10] In Phase  
10 2, these identified PC-QIs were refined through a modified Delphi consensus process [15] that  
11 involved patients, caregivers, and diverse community members, clinicians, quality improvement  
12 leaders and decision makers. Phase 3 constitutes future steps of this research and will not be  
13 reported in this paper. Phase 3 will involve a feasibility assessment of the newly developed PC-  
14 QIs, which will include in-depth interviews with quality improvement leaders and healthcare  
15 professionals to obtain their perspectives on the feasibility of implementing the PC-QIs. We will  
16 also conduct a survey of health care organizations to obtain a system-level perspective on the  
17 feasibility of implementation and to obtain greater generalizability of our findings. While this  
18 paper provides an overview of the methods used to develop the PC-QIs prior to the consensus  
19 process, additional details regarding the first phase of this research (i.e. scoping review of the  
20 literature, international environmental scan, focus group discussions, and interviews with  
21 stakeholders) will be published elsewhere. Ethics approval was granted from the University  
22 Health Research Ethics Boards [REB15-2846] at the University of Calgary.

23 **FIGURE 1 HERE**

## 1 Patient and Public Involvement

2 Our research is guided by a transformative framework with the aim of producing knowledge that  
3 seeks to improve healthcare for all people, whilst acknowledging that marginalized groups do not  
4 tend to be included in the production of knowledge due to existing power and social relationships  
5 within society. [16] Thus, consistent with a PCC, we strived to consult with diverse patients and  
6 caregivers as active collaborators through a participatory approach – doing research “with” rather  
7 than “on” them.

8  
9 A patient partner (SZ) was recruited to as part of the research team at the study’s inception, and  
10 to ensure the study is guided by the patient perspective. The patient partner has played a critical  
11 role in the study design, data collection, review of analyses, interpretation of the data, and the  
12 development of this manuscript, in addition to disseminating the findings of this research.  
13 Moreover, in Phase 1 of this study, we used a participatory approach to engage diverse patients  
14 and caregivers to identify what matters most to them in their healthcare. This would ensure that  
15 patient values, needs, and preferences are incorporated into the development of the indicators.  
16 These focus groups were conducted with the provincial Alberta Health Services Patient and  
17 Family Advisory Group, as well as ActionDignity ([www.actiondignity.org](http://www.actiondignity.org)), a community-based  
18 organization that works closely with ethno-cultural leaders in Calgary to conduct research and  
19 work towards systems and policy change. These organizations supported the development of the  
20 focus group discussion tools, recruitment, data collection, analysis, and dissemination of  
21 findings. In Phase 2 of the study, we used a consensus process with a panel of 29 people of  
22 patients, caregivers, diverse community members, providers, researchers, and quality  
23 improvement leads, which is described in this paper. Participants were routinely asked about

1 burdens to participation to ensure appropriate accommodations.

2

### 3 **Phase 1: Preliminary review**

4 This first phase involved preparatory work needed for the consensus process. In order to identify,  
5 categorize, and develop PC-QIs, we developed a conceptual PCC framework [10] based on the  
6 Donabedian quality of care model (Structure, Process and Outcome).[17]

7  
8 This phase also involved a scoping review [18,19] to identify 29 previously published PC-QIs,  
9 their implementation and evaluation in various settings, as well as best practices of PCC  
10 monitoring. To be eligible for inclusion, studies/articles had to (1) identify quality indicators for  
11 PCC and/or (2) identify PC-QIs in performance measurement (e.g., validation).[18] Indicators  
12 were assessed as being person-centred, based on the use of a PCC conceptual framework.[10]

13  
14 In parallel to the scoping review [19], an environmental scan was conducted to identify if  
15 healthcare systems in Canada, the United Kingdom, Sweden, Australia and New Zealand were  
16 using PC-QIs, which PC-QIs were in use, and how they were implemented.[20] These countries  
17 were chosen as they shared many similarities with respect to healthcare delivery and  
18 structures.[20] 61 existing indicators were identified. All unique PC-QIs identified through the  
19 scoping review and environmental scan were synthesized by the research team.

20  
21 Focus group discussions with patients and caregivers, as well interviews as key stakeholders (i.e.  
22 quality improvement leads, healthcare providers, and PCC researchers) were conducted to  
23 inform the development and prioritization of PC-QIs. With regards to focus group discussions,

1 we employed strategies to attain maximum variation among participants to ensure the patient and  
2 caregiver perspectives represent a greater diversity of people, with considerations for age, race,  
3 ethnicity, indigeneity, gender and sexual identities, rural/urban, disease conditions, and health  
4 care sectors accessed. Focus group discussions were conducted in partnership with the provincial  
5 Alberta Health Services Patient and Family Advisory Group and ActionDignity (described  
6 previously). These organizations supported the recruitment, data collection, analysis, and  
7 dissemination of findings. We identified healthcare values, preferences, and needs from a diverse  
8 sample of 65 patients and caregivers. Individual interviews with 22 healthcare providers, quality  
9 improvement experts, and PCC researchers from Canada, the USA, and England were conducted  
10 to determine perceptions around feasibility and prioritization of measuring specific domains of  
11 PCC. The findings from these focus groups and interviews were used to identify the most  
12 important PC-QIs from those that were found in the scoping review and environmental scan, as  
13 well as to guide how existing PC-QIs could be modified or refined. The focus groups and  
14 interviews also allowed us to identify any PC-QIs still needed for development.

15  
16 Based on the findings from Phase 1 and a review of the literature pertaining to gaps in  
17 measurement identified through the focus groups and interviews (i.e. access to an interpreter,  
18 cost of care, etc.), 39 unique PC-QIs were developed or modified iteratively by the research  
19 team, and subsequently classified using the PCC conceptual framework.[10] The details and key  
20 results from these sub-studies for Phase 1 have either been published or in the process of  
21 publication elsewhere. [18-20]

22



## 1 Phase 2: Modified Delphi Panel Exercise

2 Phase 2 included a consensus process, using the RAND/University of California LA  
3 Appropriateness Method (RAM).[21] RAM is a reproducible and valid nominal group technique  
4 consensus methodology using the modified Delphi technique.[15] This consensus method is used  
5 extensively in health services research.[21-23] Based on our previous experience [24, 25], the  
6 consensus method was considered highly appropriate to facilitate the panel's prioritization and  
7 refinement PC-QIs. The Delphi technique was modified to include additional people as part of  
8 the consensus process, to ensure greater representation from patients, caregivers, community  
9 members.

### 10 Panel Selection

11 A consensus panel was established consisting of patients, caregivers, diverse community  
12 members, healthcare providers, PCC researchers, and quality improvement leads. In recognition  
13 of the potential power dynamics associated with mixing groups of patients [22] , caregivers,  
14 healthcare providers, researchers, and quality improvement experts, we strove to assemble a  
15 panel where at least half of the representation was from patients, caregivers, and community  
16 members. The community members were representative from the some of the most prominent  
17 ethno-cultural communities in Calgary (i.e. Chinese, South Asian, and Filipino). The panelists  
18 were identified from their previous participation in the environmental scan, interviews, and focus  
19 groups conducted in Phase 1, as well as our collaborators' networks. Identified individuals were  
20 invited via email and provided with a summary of the project and an overview of the consensus  
21 process and expectations (e.g., time commitment and activities).

22

## 1 Rating Process and Materials

2 Panelists received a package including:

- 3 a) a manual that included a monograph of each PC-QI identified, and
- 4 b) a rating tool used for panelists to rate the PC-QIs (see rating tool here: [http://bit.do/PC-QI\\_RatingTool](http://bit.do/PC-QI_RatingTool))

5  
6 The package outlined the PC-QIs that included descriptors such as: type of indicator, proposed  
7 data source (including existing patient-reported experience measures already in use), definition,  
8 numerator, denominator, benchmark, and risk adjustment. The manual also included definitions  
9 to describe what PC-QIs are, and what constitutes a “good” quality indicator, as outlined by the  
10 National Quality Forum, which states the criteria for evaluating a new measure: importance,  
11 scientific acceptability, feasibility, and usability.[26] Additionally, the rating tool was derived  
12 from the Joint Commission Attributes of Core Performance Measures and Associated Evaluation  
13 Criteria.[27] The rating tool asked panelists to rate PC-QIs on each of the following dimensions:

- 14 • Was the PC-QI precisely defined?
- 15 • Does the PC-QI target important PCC improvements?
- 16 • Does it measure what is supposed to measure?
- 17 • It is a good global PC-QI for overall evaluation?

18 These questions were designed to assess *face, as well as construct validity* (i.e. whether the PC-  
19 QI measures what it is supposed to measure), and *appropriateness* (whether the PC-QI is an  
20 appropriate measure for PCC). The ratings materials also included questions related to  
21 implementation including *feasibility* (is data for reporting PC-QI available?) and *usability* (is the  
22 PC-QI actionable and interpretable?). Panelists used SurveyMonkey, a web-based survey tool, to  
23 remotely rate the PC-QIs in the first, third, and fourth rounds.

1  
2  
3 1  
4  
5 2 Delphi Round 1  
6  
7 3 The first round involved remote rating by panelists. In each of these remote rating rounds,  
8  
9 4 panelists used the rating material described above and the rating scale, a 9-point scale (1 = strong  
10  
11 5 disagreement, 9 = strong agreement). Overall assessment of the PC-QI scored as: *inappropriate*  
12  
13 6 (1-3), *supplementary* (consider as a PC-QI if more resources available) (4-6) and *appropriate* (7-  
14  
15 7 9).[21] Panelists also had the opportunity to provide written comments and suggest additional  
16  
17 8 PC-QIs.  
18  
19  
20  
21  
22

23  
24 10 PC-QIs ratings were summarized using medians and inter-quartile range (IQR) for the overall  
25  
26 11 rating included in the “globally it is a good PC-QI?” rating scale. Disagreement on the rating for  
27  
28 12 a PC-QI of at least a third of the panel ( $n \geq 9$ ) in the median score 1-3 and at least a third ( $n \geq 9$ )  
29  
30 13 of the panel in the median 7-9. PC-QIs with median overall scores of 1-3 were discarded; PC-QIs  
31  
32 14 with median overall score 4-9 were retained for subsequent rounds. Written comments were  
33  
34 15 analyzed using content analysis methods.  
35  
36  
37  
38

39  
40 17 Following remote ratings in round 1, the data were analyzed, and suggestions and refinements  
41  
42 18 were made to each PC-QI as appropriate. This revised version was shared via SurveyMonkey  
43  
44 19 prior to the face-to face meeting.  
45  
46

47 20 Delphi Round 2

48  
49  
50 21 During Round 2, panelists reviewed each PC-QI in a face-to-face meeting as well as the results  
51  
52 22 from the first round. The 2-day meeting was co-moderated by our patient-partner (SZ) and a  
53  
54 23 clinician researcher. The moderators led the panel through each of the PC-QIs to review the  
55  
56  
57  
58  
59  
60

1 results from the first round and to note areas of disagreement (indicated by the ratings) as they  
2 pertained to: perceived importance/necessity and relevancy for person-centred care; scientific  
3 acceptability (reliability and validity); feasibility of implementing the PC-QIs given different  
4 contexts of care; and usability to make improvements in care. The research team was available  
5 to answer clarifying questions about how the PC-QI was identified/developed and the source of  
6 the evidence supporting the PC-QIs. Deliberations were made as a group until agreement on PC-  
7 QI specifications was achieved through discussion and subsequent rounds of re-rating.  
8 Additionally, a number of indicators were proposed for merging and further refinement,  
9 particularly for perceived redundancies and in consideration for decreasing the total number of  
10 PC-QIs (for feasibility and concerns around indicator fatigue). Modifications were made to the  
11 PC-QIs required subsequent rounds of rating.

## 12 Delphi Rounds 3 & 4

13 Remote ratings in rounds 3 and 4 continued as described in the first remote rating to obtain  
14 consensus for the modified/merged PC-QIs. Through the remote rounds, revisions of each PC-QI  
15 were added to the working document and circulated among panelists for a final rating using  
16 paper-based rating tools for final review. Prior to the third round of rating, a working group that  
17 created as a response to the discussions held during the face-to-face meeting, studied the  
18 development of an indicator that captures outcomes reported directly by the patients. This  
19 working group included five patients, two family members, one physician, two quality  
20 improvement leads and two researchers. The group worked on developing the indicator and  
21 gathering information to present background knowledge to the rest of panelists. The new  
22 indicator and additional information were shared among the rest of the panelists and they rated  
23 the new indicator in round 3. Proposed refinements to the PC-QIs during round 3 were agreed on

1 during round 4 of rating, where panelists were also asked specifically about the necessity of each  
2 PC-QI, rating either a 'yes' or 'no' to keeping the indicator.

## RESULTS

### Panel

A total of 29 people participated on the consensus panel. The consensus panel comprised:

- 8 patients and 3 caregivers (37.9%) with various experience with the health care system, including primary care, acute care, cancer care, and chronic diseases (e.g. cardiovascular conditions, diabetes, etc.)
- 5 members of diverse ethno-cultural communities (17.2%) who are also patients and/or caregivers
- 2 healthcare providers (6.9%; an internist and a pediatrician),
- 5 quality improvement experts (17.2%; representing Canadian Quality Councils and health systems, Cancer Care Ontario, University of Gothenburg Centre for Person-centred Care, Sweden, Picker Institute, and University of Oxford, UK),
- 4 PCC researchers (13.8%), including: a lead from the Patient-Centered Outcomes Research Institute (PCORI), a Senior Scientist Collaboration for Leadership in Applied Health Research and Care Oxford Unit, professors from Canadian Universities and leaders of the Canadian Strategy for Patient-Oriented Research
- 1 representative (3.4%) of the Canadian Institute for Health Information

- 1 • 1 representative (3.4%) from Ministry of Health, British Columbia

2 Of the 29 panelists, for round 2, 27 attended in person, 1 attended via videoconference and 1 was  
3 absent (with this panelists comments shared with the panel). For rounds 3 and 4, 27 panelists  
4 participated in the consensus, with two panelists not participating in this phase (one caregiver  
5 and one clinician-researcher) due to conflicting commitments.

## 7 Person-Centred Quality Indicators

8 Thirty-nine PC-QIs were identified through Phase 1 and were refined through Phase 2 of the  
9 study, where they were summarized into 26 final PC-QIs. These final 26 PC-QIs included seven  
10 structure, 16 process, two outcome and one global indicator (*see Table 1*). During the first round  
11 and based on final ratings (*see Table 1*), 4 indicators were discarded including:

- 12 • Timely Unplanned Readmission from ER
- 13 • Overall Rating
- 14 • Patient-reported Outcome Multi-attribute
- 15 • Patient-reported Outcome Mental Health

16 Based on the decision to discard the last two PC-QIs, the working group proposed a new  
17 indicator related to Patient-Reported Outcomes: “Using Patient-Reported Outcome Measures to  
18 deliver Patient-Centred Care.” This newly proposed indicator was later rated and accepted in  
19 Round 3. *Table 1* summarizes the consensus panel ratings as median scores on a 9-point scale  
20 and interquartile range, as reported in previous studies. [21, 24, 25] The sources of evidence for  
21 each of the indicators are also reported in *Table 1*. For additional details on the specific  
22 modifications proposed by panelists, please refer to *Appendix 1*. During Round 2, out of the  
23 initial 39 indicators, 11 were merged with other indicators (*see Table 2*). *Appendix 1*, displays

1  
2  
3  
4  
5  
6  
7  
8  
9  
10  
11  
12  
13  
14  
15  
16  
17  
18  
19  
20  
21  
22  
23  
24  
25  
26  
27  
28  
29  
30  
31  
32  
33  
34  
35  
36  
37  
38  
39  
40  
41  
42  
43  
44  
45  
46  
47  
48  
49  
50  
51  
52  
53  
54  
55  
56  
57  
58  
59  
60

1 the ratings as median scores on a 9-point scale and interquartile range, as, as well as details on  
2 modifications that were proposed by panelists.

For peer review only

**Table 1:** Summary of Consensus Panel Ratings for Final 26 PC-QIs Developed by the Panel (Median Score on 9-point Scale and (Interquartile Range)) and Sources for Evidence

| Person-Centred Quality Indicators                                         | Round 1 Remote Panel Rating | Round 2 Face-to-Face Panel Rating | Round 3 Remote Panel Rating | Evidence Sources<br>SR = Scoping Review<br>ES = Environmental Scan<br>FGD = Focus Group Discussions<br>I = Interviews |
|---------------------------------------------------------------------------|-----------------------------|-----------------------------------|-----------------------------|-----------------------------------------------------------------------------------------------------------------------|
| <b>Structure Indicators (n= 7)</b>                                        |                             |                                   |                             |                                                                                                                       |
| Policy on Person-Centred Care                                             | 8 (6, 9)                    | Keep                              | 8 (7, 8)                    | SR, ES, FGD, I                                                                                                        |
| Educational Programs on Person-Centred care                               | 8 (7, 9)                    | Keep                              | 8 (7, 8)                    | SR, FGD, I                                                                                                            |
| Culturally Competent Care                                                 | 7 (6, 9)                    | Keep                              | 8 (7, 8)                    | SR, FGD                                                                                                               |
| Co-designing care in partnership with communities                         | 8 (6, 9)                    | Keep                              | 8 (7, 8)                    | FGD                                                                                                                   |
| Providing an Accommodating and Supportive Person-Centred Care Environment | 7 (5, 8)                    | Keep                              | 7 (6, 8)                    | SR, FGD                                                                                                               |
| Healthcare Information Technology to Support Person-Centred Care          | 8 (5, 9)                    | Keep                              | 8 (7, 8)                    | I                                                                                                                     |
| Structures to Report Person-Centred Care Performance                      | 8 (8, 9)                    | Keep                              | 8 (8, 9)                    | I                                                                                                                     |
| <b>Process Indicators (n=16)</b>                                          |                             |                                   |                             |                                                                                                                       |
| Compassionate Care                                                        | 9 (8, 9)                    | Keep                              | 8 (8, 9)                    | SR, FGD, I                                                                                                            |
| Equitable care                                                            | 8 (7, 9)                    | Keep                              | 9 (8, 9)                    | SR, FGD, I                                                                                                            |
| Trusting Relationship with Healthcare Provider                            | 9 (8, 9)                    | Keep                              | 8 (8, 9)                    | SR, FGD, I                                                                                                            |
| Timely Access to a Primary Care Provider                                  | 8 (7, 9)                    | Keep                              | 8 (6.5, 9)                  | ES, FGD                                                                                                               |
| Accessing Interpreter Services                                            | 8 (7, 9)                    | Keep                              | 8 (7, 9)                    | SR, FGD                                                                                                               |



|                                                                                 |               |                                                                   |          |                |
|---------------------------------------------------------------------------------|---------------|-------------------------------------------------------------------|----------|----------------|
| Communication with Healthcare System                                            | 8 (7, 9)      | Keep                                                              | 8 (8, 9) | SR, ES, FGD    |
| Communication between Patient and Healthcare Provider - Nurse                   | 8 (7.5, 9)    | Keep                                                              | 8 (8, 9) | SR, ES, FGD, I |
| Communication between Patient and Healthcare Provider - Physician               | 8 (8, 9)      | Keep                                                              | 9 (8, 9) | SR, ES, FGD, I |
| Information about Taking Medication                                             | 9 (7, 9)      | Keep                                                              | 8 (8, 9) | SR, ES, FGD    |
| Communicating Test Results                                                      | 8 (7, 9)      | Keep                                                              | 8 (8, 9) | SR, FGD        |
| Coordination of Care                                                            | 9 (7, 9)      | Keep                                                              | 8 (8, 9) | SR, ES, FGD    |
| Patient and Caregiver Involvement in Decisions about their Care and Treatment   | 8 (8, 9)      | Keep                                                              | 9 (8, 9) | SR, ES, FGD, I |
| Engaging Patients in Managing their Own Health                                  | 8 (7, 9)      | Keep                                                              | 8 (8, 9) | SR, ES, FGD, I |
| Patient Preparation for a Care Plan at a Healthcare Facility                    | 8 (7, 9)      | Keep                                                              | 8 (7, 9) | SR, ES, FGD    |
| Transition Planning                                                             | 9 (8, 9)      | Keep                                                              | 9 (8, 9) | FGD            |
| Using Patient-reported Outcome Measures (PROMs) to Deliver Patient-Centred Care | Not developed | Newly developed derived from previous 'Patient-reported outcomes' | 7 (5, 9) | Consensus      |
| <b>Outcome Indicators (n=2)</b>                                                 |               |                                                                   |          |                |
| Cost of Care- Affordability                                                     | 6.5 (5, 9)    | Keep                                                              | 7 (5, 9) | FGDs           |
| Overall Experience                                                              | 8 (6, 9)      | Keep                                                              | 9 (7, 9) | SR, ES         |
| <b>Global Indicator (n=1)</b>                                                   |               |                                                                   |          |                |
| Friends and Family Test                                                         | 7 (5, 9)      | 6.5 (2.5, 7)                                                      | 7 (6, 8) | ES             |

1  
2  
3  
4  
5  
6  
7  
8

**Table 2:** Merged PC-QIs

| Original PC-QIs                                                               | Final PC-QIs Incorporating Original PC-QIs                                |
|-------------------------------------------------------------------------------|---------------------------------------------------------------------------|
| <b>Structure</b>                                                              |                                                                           |
| Supporting a Workshop Committed to PCC                                        | Policy on PCC                                                             |
| Partnership with Communities                                                  |                                                                           |
| Protocol for integration of structures to support health technology           |                                                                           |
| Protocol addressing discriminatory care                                       | Educational Programs on PCC                                               |
| Program/protocol for recruitment and retention of staff of diverse background |                                                                           |
| Noise during hospitalization                                                  | Providing an Accommodating and Supportive Person-Centred Care Environment |
| Providing an Environment that Reflects Diversity and Inclusion                |                                                                           |
| Educational Programs Reflecting Cultural Competency and Humility              | Culturally Competent Care                                                 |
| <b>Process</b>                                                                |                                                                           |
| Post-discharge planning                                                       | Transition Planning                                                       |
| Timely follow-up after discharge                                              |                                                                           |
| Discharge summaries available after 48 hour of discharge from hospital        |                                                                           |

A flow chart of the rating process can be found in *Figure 2*.

FIGURE 2 HERE

A complete summary of the final PC-QIs that were developed is available here:

[https://www.personcentredcareteam.com/s/PC-QIs\\_Monograph\\_Santana-et-al-2019.pdf](https://www.personcentredcareteam.com/s/PC-QIs_Monograph_Santana-et-al-2019.pdf) Each

of these newly developed indicators are evidence-informed and person-centred, some addressing

a specific aspect of healthcare quality (e.g. safety versus equity).

## DISCUSSION

1  
2  
3  
4  
5  
6  
7  
8  
9  
10  
11  
12  
13  
14  
15  
16  
17  
18  
19  
20  
21  
22  
23  
24  
25  
26  
27  
28  
29  
30  
31  
32  
33  
34  
35  
36  
37  
38  
39  
40  
41  
42  
43  
44  
45  
46  
47  
48  
49  
50  
51  
52  
53  
54  
55  
56  
57  
58  
59  
60

1  
2 As Moira Stewart stated in her 2001 editorial: “The patient should be the judge of patient-centred  
3 care.”[28] This article presents a new set of Person-Centred Quality Indicators (PC-QIs)  
4 developed and validated through a modified Delphi process that featured the patient perspective  
5 on what matters most to them in their care. These PC-QIs are evidence-based and patient-  
6 informed, and widely applicable across healthcare sectors and contexts. The use of these  
7 standardized metrics to measure PCC can help to drive the changes needed to improve the  
8 quality of healthcare that is person-centred.

9  
10 The strength of this study is the person-centred approach used to develop metrics to evaluate  
11 PCC, which ensures that PCC is evaluated from the perspective of those who provide and receive  
12 care. To our knowledge, this is the first study to develop a generic set of PC-QIs using a rigorous  
13 evidence-based and person-centred approach, and involving the patient and caregiver throughout  
14 the research process – from inception to manuscript development. Using a highly participatory  
15 approach and a transformative lens, we sought to ensure the study was guided by the patient  
16 perspective, and that diverse and marginalized perspectives were reflected in the development of  
17 the PC-QIs. While PC-QIs were identified in the scoping review, first – the vast majority of these  
18 were not considered actual indicators in compliance with quality improvement agencies, such as  
19 the Agency for Healthcare Research and Quality (presented as units of measurement, such as  
20 percentage or proportion); second – many measures were not developed with significant patient  
21 input.[29] For instance, previous work conducted by Ouwens et al. in 2010 to develop a person-  
22 centred measures for cancer care involved patients in determining what would be important to  
23 measure.[30] The patient involvement was limited to semi-structured interviews to obtain the

1 patient perspective on what guideline recommendations could be used for measuring PCC. In  
2 another study related to the development of measures for person-centred cancer care, Uphoff et  
3 al. 2012 involved patients as part of the consensus panel along with medical professionals.[31]  
4 While this work has been instrumental in demonstrating the value of the patient perspective in  
5 developing measures for PCC, only three patients were involved, out of fourteen experts on the  
6 panel. Issues around potential power imbalances were not accounted for. In our study, we strived  
7 to have approximately half of our panelists comprised of patients, caregivers, and community  
8 members, to ensure a balance of perspectives. For most quality indicators that are developed,  
9 including those we identified in our environmental scan, PC-QIs tend to be developed based on  
10 what healthcare authorities, quality improvement experts, or researchers deem as most important  
11 for quality improvement. Patients and the public are seldom involved in decisions about quality  
12 of care despite being the ones who experience and receive care. How can PCC be truly improved  
13 if we continue to measure PCC without the patient perspective on what should be measured?  
14 These newly developed indicators present an opportunity to improve healthcare quality in ways  
15 that matter most to people. To drive changes in healthcare policy and practice, there is a need to  
16 develop and implement standardized ongoing mechanisms to measure and evaluate quality  
17 incorporating the patients' perspectives.[14]  
18  
19 These PC-QIs offer a tremendous opportunity leverage ongoing initiatives to improve PCC by  
20 using data already being collected in many healthcare jurisdictions and helping to standardize the  
21 collection, use, and reporting of this data. This includes patient-reported experience measures  
22 (PREMs, such as Hospital Consumer Assessment of Health Providers and Systems) and patient-  
23 reported outcome measures (PROMs). Integrating PC-QIs into performance measurement

1 frameworks can promote actionability for improving PCC. While PREMs and PROMs are often  
2 used at the provider level, there is little evidence of use for system-level applications and  
3 actionability. These indicators empower jurisdictions to monitor healthcare system performance  
4 and evaluate policy and practice related to PCC, while also including the patient's voice. Finally,  
5 the routinized use of standardized metrics, such as PC-QIs, to evaluate PCC will help to strengthen  
6 the evidence-base for the PCC model.[32]

7  
8 A key limitation of this research is that these indicators have yet to be operationalized and  
9 evaluated in practice. It is only through empirical testing that the feasibility of data collection can  
10 be determined and whether they meet the requirements of "good quality measures" – that are  
11 acceptable, reliable, and valid.[33] Moreover, studying the implementation of the PC-QIs can  
12 provide important insight into their effectiveness for promoting improvements in PCC as well as  
13 patient experiences and outcomes. It is also important to identify any unintended consequences  
14 as a result of PC-QI implementation, their use for benchmarking, and other issues, such as  
15 workload and cost-effectiveness.[33] Additionally, while this method has generated these 26 PC-  
16 QIs using a validated consensus method, they may not necessarily be universally applicable in all  
17 countries and settings. Different cultural settings in different healthcare regulatory environments  
18 may mean that different measures may be more appropriate for certain settings. Further work can  
19 be done to tailor and adapt these PC-QIs, recognizing that a consideration of the local context  
20 will ensure a more universal relevance.

21  
22 Future steps for this work include an assessment of the feasibility of implementing these PC-QIs  
23 (Phase 3, see *Figure 1*). Secondly, we plan to pilot the use of the PC-QIs in national and

1 international jurisdictions to promote PCC and to evaluate of the use of these measures for  
2 improving healthcare quality of care from the perspectives of the patient.

## 3 CONCLUSIONS

4 In conclusion, the development of these newly developed evidence-based and person-informed  
5 PC-QIs represent an important contribution towards efforts to measure and improve person-  
6 centred care. While these indicators have yet to be evaluated, the PC-QIs are available tools that  
7 healthcare systems can use to monitor and evaluate the delivery of PCC, identify the gaps, and  
8 make the changes needed to improve the quality of care. Importantly, these indicators have the  
9 potential to shift our healthcare systems towards a new paradigm for assessing quality by  
10 ensuring we measure what matters most to patients

11  
12 **Acknowledgements** The authors are thankful for the contributions and support to this project by  
13 Dr. V. Yiu, Dr. G. Teare, Dr. K Wittmeier, Dr. M. O’Beirne, Dr. N. Jette, Dr. M. Lu, Dr. T.  
14 Sajobi, Dr. D. Lorenzetti, D. LeLievre, L. Cuthbertson, and members of the consensus panel.  
15 The authors thank the investigators, collaborators, and partners of the Person-Centred Care  
16 Quality Indicators Study, as well as the research team, who supported data collection and  
17 analysis for the consensus process, including: Sadia Ahmed, Chelsea Doktorchik, Ashton Chugh,  
18 and Bijan Mohamed. The authors would also like extend their gratitude to Dr. Gwen McGhan for  
19 her role in facilitating the consensus process, and all of the patients, caregivers, community  
20 members, healthcare providers, and researchers who participated in the consensus. The authors  
21 would also like to acknowledge Brian Steele, for his support with the submission of this article.

22

1  
2  
3 1 **Contributors** MJS, KM, SZ, SB, EG, KL, HQ, and RS contributed to the study concept, study  
4  
5 2 design, and acquisition of funding. MJS and KM conducted data analysis and the  
6  
7 3 modifications/refinements to the Person-Centred Quality Indicators that are presented in this  
8  
9 4 manuscript. The manuscript was drafted by MJS, KM, and PF. All authors (MJS, KM, SZ, SB,  
10  
11 5 EG, JK, LF, SW, PF, KL, HQ, and RS) contributed to the data acquisition and interpretation,  
12  
13 6 critical review and revision of the manuscript for intellectual content. All authors also provided  
14  
15 7 their final approval of this publication and agree to be accountable for all aspects of the work to  
16  
17 8 ensure both accuracy and integrity of this research.  
18  
19  
20  
21  
22  
23

24 10 **Funding** MJS, HQ, RS, KM, SZ, EB, SB, and KL secured funding from the Canadian Institutes  
25  
26 11 for Health Research for this study (Grant# 201709PJT). KM is supported by the Vanier Canada  
27  
28 12 Graduate Scholarship, through the Canadian Institutes for Health Research (Award#  
29  
30 13 201810CGV). CIHR played no role in the project. The Alberta Strategy for Patient-Oriented  
31  
32 14 Research (SPOR) employs some of the research staff (MJS, KM, SZ, PF, HQ) to conduct  
33  
34 15 research into patient-centred care, beyond which there was no involvement in the research.  
35  
36  
37

38 16  
39 17 **Competing interests** All authors have completed the ICMJE uniform disclosure form  
40  
41 18 at [www.icmje.org/coi\\_disclosure.pdf](http://www.icmje.org/coi_disclosure.pdf) and declare: no support from any organisation for the  
42  
43 19 submitted work; no financial relationships with any organisations that might have an interest in  
44  
45 20 the submitted work in the previous three years; no other relationships or activities that could  
46  
47 21 appear to have influenced the submitted work.  
48  
49

50 22  
51 23 **Patient consent for publication** Not required.  
52  
53 24  
54 25

1  
2  
3 1  
4  
5 2 **Transparency statement** The lead author affirms that this manuscript is an honest, accurate, and  
6  
7  
8 3 transparent account of the study being reported; that no important aspects of the study have been  
9  
10 4 omitted; and that any discrepancies from the study as planned (and, if relevant, registered) have  
11  
12 5 been explained.  
13  
14  
15 6

16  
17 7 **License statement** I, the Submitting Author has the right to grant and does grant on behalf of all  
18  
19 8 authors of the Work (as defined in the below author licence), an exclusive licence and/or a non-  
20  
21 9 exclusive licence for contributions from authors who are: i) UK Crown employees; ii) where  
22  
23 10 BMJ has agreed a CC-BY licence shall apply, and/or iii) in accordance with the terms applicable  
24  
25 11 for US Federal Government officers or employees acting as part of their official duties; on a  
26  
27 12 worldwide, perpetual, irrevocable, royalty-free basis to BMJ Publishing Group Ltd (“BMJ”) its  
28  
29 13 licensees and where the relevant Journal is co-owned by BMJ to the co-owners of the Journal, to  
30  
31 14 publish the Work in BMJ Open and any other BMJ products and to exploit all rights, as set out in  
32  
33 15 our licence.  
34  
35  
36  
37  
38 16

39  
40 17 The Submitting Author accepts and understands that any supply made under these terms is made  
41  
42 18 by BMJ to the Submitting Author unless you are acting as an employee on behalf of your  
43  
44 19 employer or a postgraduate student of an affiliated institution which is paying any applicable  
45  
46 20 article publishing charge (“APC”) for Open Access articles. Where the Submitting Author  
47  
48 21 wishes to make the Work available on an Open Access basis (and intends to pay the relevant  
49  
50 22 APC), the terms of reuse of such Open Access shall be governed by a Creative Commons licence  
51  
52  
53  
54  
55  
56  
57  
58  
59  
60



1  
2  
3 1 – details of these licences and which Creative Commons licence will apply to this Work are set  
4  
5 2 out in our licence referred to above.  
6  
7  
8 3  
9

10 4 **Data sharing statement** Some materials and documentation may be available to other  
11  
12 5 researchers. Please contact the corresponding author with a detailed request.  
13  
14  
15 6  
16  
17 7  
18  
19  
20  
21  
22  
23  
24  
25  
26  
27  
28  
29  
30  
31  
32  
33  
34  
35  
36  
37  
38  
39  
40  
41  
42  
43  
44  
45  
46  
47  
48  
49  
50  
51  
52  
53  
54  
55  
56  
57  
58  
59  
60

## References

- 1 OECD. Health Ministerial Statement - The next generation of health reforms. Published January 17 2017; accessed November 2019. <http://www.oecd.org/health/ministerial/ministerial-statement-2017.pdf>.
- 2 Coulter, A. Measuring what matters to patients. *BMJ* 2017;356:j816.
- 3 Institute of Medicine. Crossing the quality chasm: A new health system for the 21st century. Washington (DC): National Academies Press:2001.
- 4 Pelzang R. Time to learn: Understanding patient-centred care. *Br J Nurs* 2010;19:912-7.
- 5 National Department of Health - National Health Service. NHS 2010-2015: From Good to Great. Preventative, People-Centred, Productive. 2009.
- 6 Davis K, Schoenbaum SC, Audet AM. A 2020 vision of patient-centered primary care. *J Gen Intern Med* 2005;20:953-7.
- 7 Alberta Health Services. The Patient First Strategy. 2015.
- 8 Stoelwinder JU. Final report of the National Health and Hospitals Reform Commission: will we get the health care governance reform we need? *Med J Aust* 2009;191:387-8.
- 9 World Health Organization. Leading and Managing Change towards People-Centred and Integrated Health Services. 2015.
- 10 Santana MJ, Manalili K, Jolley RJ, et al. How to practice person-centred care: A conceptual framework. *Health Expect* 2018;21:429-40.
- 11 Stewart M, Brown JB, Donner A, et al. The impact of patient-centered care on outcomes. *J Fam Pract* 2000;49:796-804.
- 12 McMillan SS, Kendall E, Sav A, et al. Patient-centered approaches to health care: a systematic review of randomized controlled trials. *Med Care Res Rev* 2013;70:567-96.
- 13 Mead N, Bower P. Patient-centred consultations and outcomes in primary care: a review of the literature. *Patient Educ Couns* 2002;48:51-61.
- 14 Berwick DM, Nolan TW, Whittington J. The triple aim: care, health, and cost. *Health Aff* 2008;27:759-69.
- 15 Jones J, Hunter D. Consensus methods for medical and health services research. *Br Med J* 1995;311:376.
- 16 Mertens DM, Holmes HM, Harris RL. Transformative research and ethics. In: Mertens DM, Ginsberg, PE eds. *The Handbook of Social Research Ethics*. Sage Publications: Thousand Oaks, CA. 2009:85-101.
- 17 Donabedian A. Evaluating the quality of medical care. *Milbank Q* 1966;44:166-206.
- 18 Jolley RJ, Lorenzetti DL, Manalili K, et al. Protocol for a scoping review study to identify and classify patient-centred quality indicators. *BMJ Open* 2017;7:e013632.
- 19 Santana MJ, Ahmed S, Lorenzetti D, et al. Measuring patient-centred system performance: a scoping review of patient-centred care quality indicators. *BMJ Open* 2019;9:e023596.
- 20 Doktorchik C, Manalili K, Jolley R, et al. Identifying Canadian patient-centred care measurement practices and quality indicators: a survey. *CMAJ Open* 2018;6:e643.
- 21 Fitch K, Bernstein SJ, Aguilar MD, Burnand B, LaCalle JR. The RAND/UCLA appropriateness method user's manual. RAND CORP: Santa Monica, CA; 2001.
- 22 McKenzie E, Potestio ML, Boyd JM, et al. Reconciling patient and provider priorities for improving the care of critically ill patients: a consensus method and qualitative analysis of decision making. *Health Expect* 2017;20:1367-74.
- 23 Stelfox HT, Straus SE. Measuring quality of care: considering conceptual approaches to quality indicator development and evaluation. *J Clin Epidemiol* 2013;66:1328-37.

- 1  
2  
3 1 24 Stelfox HT, Khandwala F, Kirkpatrick AW, Santana MJ. Trauma center volume and quality  
4 2 improvement programs. *J Trauma Acute Care Surg* 2012;72:962-8.  
5 3 25 Santana MJ, Stelfox HT. Development and evaluation of evidence-informed quality  
6 4 indicators for adult injury care. *Ann Surg* 2014;259:186-92.  
7 5 26 Dimick JB. What makes a “good” quality indicator?: comment on “Quality indicators for  
8 6 evaluating trauma care”. *Archives of Surgery*. 2010 Mar 1;145(3):295.  
9 7 27 The Joint Commission. Attributes of Core Performance Measures and Associated Evaluation  
10 8 Criteria. 2010.  
11 9 28 Stewart M. Towards a global definition of patient centred care: the patient should be the judge  
12 10 of patient centred care. *BMJ* 2001;322:444-5.  
13 11 29 Agency for Healthcare Research and Quality. Quality Improvement and monitoring at your  
14 12 fingertips. Secondary Quality Improvement and monitoring at your fingertips. [https://www.](https://www.qualityindicators.ahrq.gov/)  
15 13 [qualityindicators.ahrq.gov/](https://www.qualityindicators.ahrq.gov/) (Accessed 01 Oct 2017).  
16 14 30 Ouwens M, Hermens R, Hulscher M, Vonk-Okhuijsen S, Tjan-Heijnen V, Termeer R, Marres  
17 15 H, Wollersheim H, Grol R. Development of indicators for patient-centred cancer care. *Support*  
18 16 *Care Cancer*. 2010 Jan 1;18(1):121.  
19 17 31 Uphoff EP, Wennekes L, Punt CJ, Grol RP, Wollersheim HC, Hermens RP, Ottevanger PB.  
20 18 Development of generic quality indicators for patient-centered cancer care by using a RAND  
21 19 modified Delphi method. *Cancer Nurs*. 2012 Jan 1;35(1):29-37.  
22 20 32 Montague T, Gogovor A, Aylen J, et al. Patient-Centred Care in Canada: Key Components  
23 21 and the Path Forward. *Healthc Q* 2017;20:50-6.  
24 22 33 Grol R, Wensing M, Eccles M, Davis D, Editors. Improving patient care: the implementation  
25 23 of change in health care. John Wiley & Sons; 2013.  
26 24  
27 25  
28 26  
29 27  
30 28  
31 29  
32 30  
33 31  
34 32  
35 33  
36 34  
37 35  
38  
39  
40  
41  
42  
43  
44  
45  
46  
47  
48  
49  
50  
51  
52  
53  
54  
55  
56  
57  
58  
59  
60

1  
2  
3 **Figure 1 Legend:** Figure 1 shows an overview of the program of research on Developing  
4 Person-Centred Quality Indicators (PC-QIs). The program of research includes three phases of  
5 research: Identifying and Developing PC-QIs; refinement of the PC-QIs, and feasibility of  
6 assessment of the newly developed PC-QIs. This manuscript shows the final results (final set  
7 PC-QIs), based on research from the first two phases.  
8  
9

10 **Figure 2 Legend:** Figure 2 shows a flow chart of the PC-QI Delphi process, describing the  
11 timeline for Rounds alongside the numbers of PCQIs surviving each round. There are arrows  
12 pointing down from “39 PCQIs evaluated” to each subsequent “*n* PCQIs evaluated” box, until  
13 the final “26 PCQIs evaluated” box.  
14  
15  
16  
17  
18  
19  
20  
21  
22  
23  
24  
25  
26  
27  
28  
29  
30  
31  
32  
33  
34  
35  
36  
37  
38  
39  
40  
41  
42  
43  
44  
45  
46  
47  
48  
49  
50  
51  
52  
53  
54  
55  
56  
57  
58  
59  
60

1  
2  
3  
4  
5  
6  
7  
8  
9  
10  
11  
12  
13  
14  
15  
16  
17  
18  
19  
20  
21  
22  
23  
24  
25  
26  
27  
28  
29  
30  
31  
32  
33  
34  
35  
36  
37  
38  
39  
40  
41  
42  
43  
44  
45  
46  
47

For peer review only

Figure 1: Study at a Glance

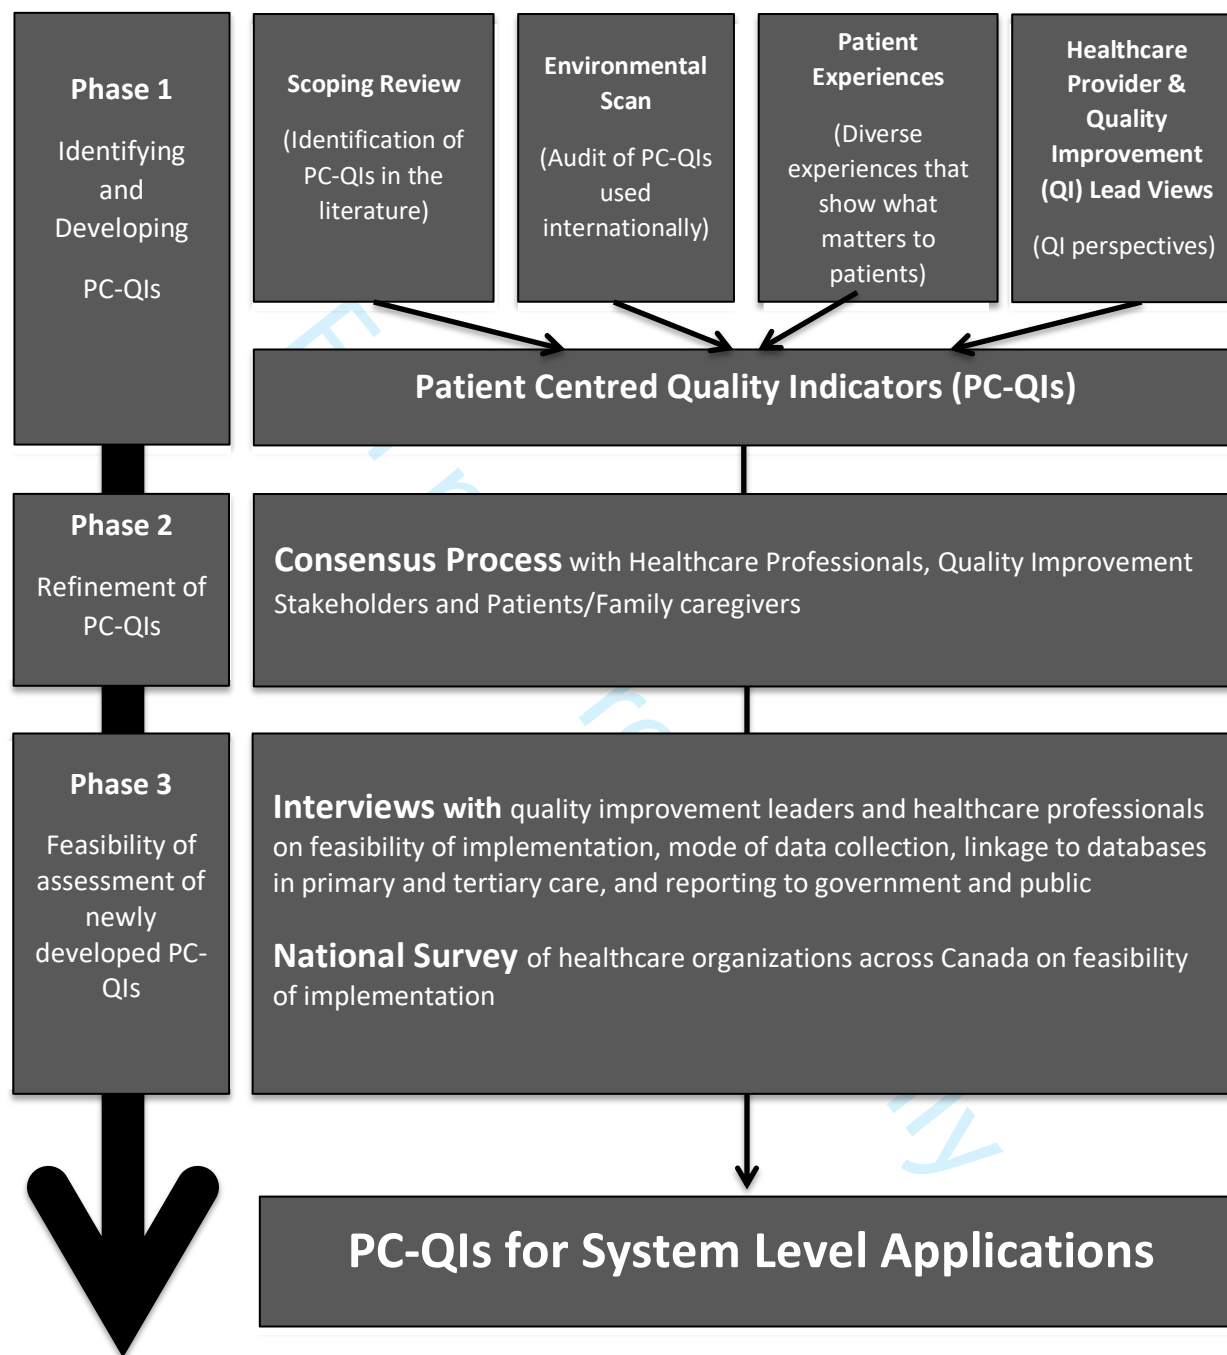

Figure 1 shows an overview of the program of research on *Developing Person-Centred Quality Indicators (PC-QIs)*. The program of research includes three phases of research: Identifying and Developing PC-QIs; refinement of the PC-QIs, and feasibility of assessment of the newly developed PC-QIs. This manuscript shows the final results (final set PC-QIs), based on research from the first two phases.

Figure 2: Flow Chart of PC-QI Delphi Process (Ratings and Modifications)

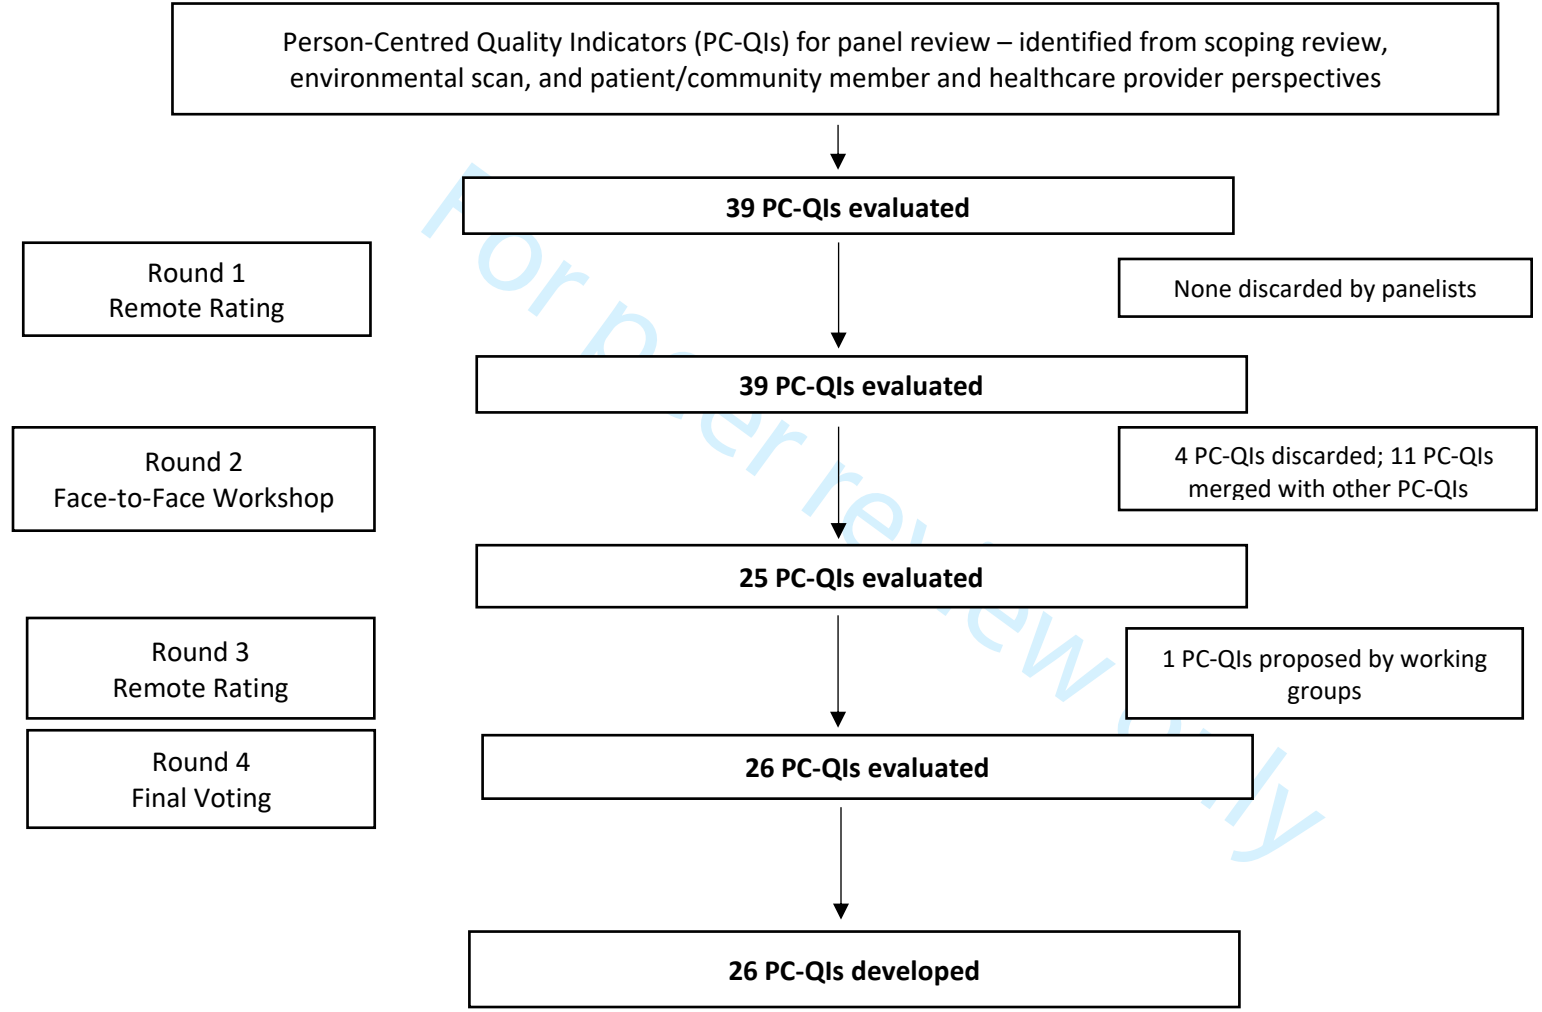

Figure 2 shows a flow chart of the PC-QI Delphi process, describing the timeline for Rounds alongside the numbers of PCQIs surviving each round. There are arrows pointing down from “39 PCQIs evaluated” to each subsequent “n PCQIs evaluated” box, until the final “26 PCQIs evaluated” box.

**Appendix 1:** Summary of Ratings [median score on 9-point scale and interquartile range (IQR)] and Modifications for PC-QIs Rated and Revised (PC-QIs = 39)

| Initial Person-Centred Quality Indicators                                 | Round 1 Remote Panel Rating Median Score on 9-point Scale (IQR) | Round 2 Face-to-Face Panel Rating Median Score on 9-point Scale (IQR) – as applicable for disagreement<br>*initially rated as Keep/Discard | Round 2 Modifications                                     | Round 3 Remote Panel Rating Median Score on 9-point Scale (IQR) | Round 3 Modifications   | Round 4 Final Remote Panel Rating – Keep/Discard |
|---------------------------------------------------------------------------|-----------------------------------------------------------------|--------------------------------------------------------------------------------------------------------------------------------------------|-----------------------------------------------------------|-----------------------------------------------------------------|-------------------------|--------------------------------------------------|
| <b>Structure Indicators</b>                                               |                                                                 |                                                                                                                                            |                                                           |                                                                 |                         |                                                  |
| Policy on Person-Centred Care                                             | 8 (6, 9)                                                        | Keep                                                                                                                                       | Expanded on description                                   | 8 (7, 8)                                                        | None                    | Keep                                             |
| Educational Programs on Person-Centred care                               | 8 (7, 9)                                                        | Keep                                                                                                                                       | Expanded on description                                   | 8 (7, 8)                                                        | Expanded on description | Keep                                             |
| Protocol addressing Discriminatory Care                                   | 7.5 (6, 9)                                                      | Keep                                                                                                                                       | Merged with “Educational Programs on Person-Centred Care” | N/A                                                             | N/A                     | N/A                                              |
| Protocol Addressing Cultural Competence                                   | 7 (6, 9)                                                        | Keep                                                                                                                                       | Changed wording to “Culturally Competent Care”            | 8 (7, 8)                                                        | Expanded on definition  | Keep                                             |
| Educational Programs reflecting Cultural Competency and Cultural Humility | 7 (6, 9)                                                        | Keep                                                                                                                                       | Merged with “Culturally Competent Care”                   | N/A                                                             | N/A                     | N/A                                              |



|                                                                                |            |              |                                                                                              |          |                                                        |      |
|--------------------------------------------------------------------------------|------------|--------------|----------------------------------------------------------------------------------------------|----------|--------------------------------------------------------|------|
| Program/Protocol for recruitment and retention of staff of diverse backgrounds | 8 (5.5, 9) | Keep         | Merged with "Educational Programs on Person-Centred Care"                                    | N/A      | N/A                                                    | N/A  |
| Supporting a Workforce Committed to Person-Centred Care                        | 7 (4, 9)   | Disagreement | Merged with "Policy on Person-Centred Care"                                                  | N/A      | N/A                                                    | N/A  |
| Providing a Supportive and Accommodating Person-Centred Care Environment       | 7 (5, 8)   | Keep         | Clarified language in description                                                            | 7 (6, 8) | None                                                   | Keep |
| Providing an Environment that Reflects Diversity and Inclusion                 | 8 (5, 9)   | Keep         | Merged with "Providing a Supportive and Accommodating Person-Centred Care Environment"       | N/A      | N/A                                                    | N/A  |
| Partnership with Communities                                                   | 8 (6, 9)   | Keep         | Expanded description; changed wording to "Co-designing care in partnership with communities" | 8 (7, 8) | Components merged with "Policy on Person-Centred Care" | Keep |
| Protocol for the Integration of                                                | 8 (5, 9)   | Keep         | Expanded description;                                                                        | 8 (6, 8) | Components merged with                                 | N/A  |

|                                                      |          |      |                                                                                       |          |                                 |      |
|------------------------------------------------------|----------|------|---------------------------------------------------------------------------------------|----------|---------------------------------|------|
| Structures to Support Health Information Technology  |          |      | changed working to “Healthcare Information Technology to Support Person-Centred Care” |          | “Policy on Person-Centred Care” |      |
| Structures to Report Person-Centred Care Performance | 8 (8, 9) | Keep | Changes to description of data source                                                 | 8 (8, 9) | None                            | Keep |
| <b>Process Indicators</b>                            |          |      |                                                                                       |          |                                 |      |
| Compassionate Care                                   | 9 (8, 9) | Keep | Broadening of definition, providing example measures                                  | 8 (8, 9) | None                            | Keep |
| Equitable care                                       | 8 (7, 9) | Keep | Broadening of definition, providing example measures                                  | 9 (8, 9) | Expanded definition             | Keep |
| Trusting Relationship with Healthcare Provider       | 9 (8, 9) | Keep | Broadening of definition, providing example measures                                  | 8 (8, 9) | None                            | Keep |
| Accessing Interpreter Services                       | 8 (7, 9) | Keep | Broadening of definition, providing example measures                                  | 8 (7, 9) | None                            | Keep |

1  
2  
3  
4  
5  
6  
7  
8  
9  
10  
11  
12  
13  
14  
15  
16  
17  
18  
19  
20  
21  
22  
23  
24  
25  
26  
27  
28  
29  
30  
31  
32  
33  
34  
35  
36  
37  
38  
39  
40  
41  
42  
43  
44  
45  
46  
47

|                                                                   |            |      |                                                                    |          |                                                                     |      |
|-------------------------------------------------------------------|------------|------|--------------------------------------------------------------------|----------|---------------------------------------------------------------------|------|
| Communication with Healthcare System                              | 8 (7, 9)   | Keep | Broadening of definition, providing example measures               | 8 (8, 9) | Example items from measure included                                 | Keep |
| Communication between Patient and Healthcare Provider - Nurse     | 8 (7.5, 9) | Keep | Broadening of definition                                           | 8 (8, 9) | Edits to example measures                                           | Keep |
| Communication between Patient and Healthcare Provider - Physician | 8 (8, 9)   | Keep | Broadening of definition                                           | 9 (8, 9) | Edits to example measures                                           | Keep |
| Information about Taking Medication                               | 9 (7, 9)   | Keep | Expanded on description                                            | 8 (8, 9) | Expanded description                                                | Keep |
| Communicating Test Results                                        | 8 (7, 9)   | Keep | Expanded on description; providing example measures                | 8 (8, 9) | None                                                                | Keep |
| Coordinating Your Care                                            | 9 (7, 9)   | Keep | Expanded on description; changed wording to "Coordination of Care" | 8 (8, 9) | Expanded on definition                                              | Keep |
| Patient Involvement in Decisions About Their Care and Treatment   | 8 (8, 9)   | Keep | Broadening of definition                                           | 9 (8, 9) | Changed wording to "Patient and Caregiver Involvement in Decisions" | Keep |

|                                                          |            |         |                                                                                                       |            |                                 |      |
|----------------------------------------------------------|------------|---------|-------------------------------------------------------------------------------------------------------|------------|---------------------------------|------|
|                                                          |            |         |                                                                                                       |            | about Their Care and Treatment" |      |
| Engaging Patients in Managing their Own Health           | 8 (7, 9)   | Keep    | Clarification of self-management                                                                      | 8 (8, 9)   | Expanded on definition          | Keep |
| Timely Access to a Primary Care Provider                 | 8 (7, 9)   | Keep    | None                                                                                                  | 8 (6.5, 9) | None                            | Keep |
| Patient preparation for a planned admission to hospital  | 8 (7, 9)   | Keep    | Broadening of definition and wording changed to "Patient Preparation for a Planned Treatment Program" | 8 (7, 9)   | None                            | Keep |
| Time to Unplanned Admission Through Emergency Department | 7.5 (6, 9) | Discard | Discarded by panel                                                                                    | N/A        | N/A                             | N/A  |
| Discharge Planning                                       | 9 (8, 9)   | Keep    | Change focus from discharge to continuum of care; wording changed to "Transition Planning"            | 9 (8, 9)   | Edits to example measures       | Keep |

|                                                                                                                                                                                                                                                                               |                                                                                       |              |          |                                                                                        |          |                      |      |
|-------------------------------------------------------------------------------------------------------------------------------------------------------------------------------------------------------------------------------------------------------------------------------|---------------------------------------------------------------------------------------|--------------|----------|----------------------------------------------------------------------------------------|----------|----------------------|------|
| 1<br>2<br>3<br>4<br>5<br>6<br>7<br>8<br>9<br>10<br>11<br>12<br>13<br>14<br>15<br>16<br>17<br>18<br>19<br>20<br>21<br>22<br>23<br>24<br>25<br>26<br>27<br>28<br>29<br>30<br>31<br>32<br>33<br>34<br>35<br>36<br>37<br>38<br>39<br>40<br>41<br>42<br>43<br>44<br>45<br>46<br>47 | Post-Discharge Planning                                                               | 8 (7, 9)     | Keep     | Merged with "Transition Planning"                                                      | N/A      | N/A                  | N/A  |
|                                                                                                                                                                                                                                                                               | Timely Follow-up with Hospital Discharged Patients                                    | 8 (5, 9)     | Keep     | Merged with "Transition Planning"                                                      | N/A      | N/A                  | N/A  |
|                                                                                                                                                                                                                                                                               | Discharge Summaries Available to Community Care Provider Within 48 Hours of Discharge | 8 (7, 9)     | Keep     | Merged with "Transition Planning"                                                      | N/A      | N/A                  | N/A  |
|                                                                                                                                                                                                                                                                               | Noise During Hospitalization/Stay                                                     | 7 (6, 8)     | Keep     | Merged with "Providing a supportive and accommodating person-centred care environment" | N/A      | N/A                  | N/A  |
|                                                                                                                                                                                                                                                                               | <b>Outcome Indicators</b>                                                             |              |          |                                                                                        |          |                      |      |
|                                                                                                                                                                                                                                                                               | Overall Rating                                                                        | 7.5 (5, 8.5) | Discard  | Discarded by panel                                                                     | N/A      | N/A                  | N/A  |
|                                                                                                                                                                                                                                                                               | Overall Experience                                                                    | 8 (6, 9)     | Keep     | None                                                                                   | 9 (7, 9) | Expanded description | Keep |
|                                                                                                                                                                                                                                                                               | Cost of Care-Affordability                                                            | 6.5 (5, 9)   | Keep     | None                                                                                   | 7 (5, 9) | None                 | Keep |
|                                                                                                                                                                                                                                                                               | Patient-Reported Outcomes – General Health                                            | 7 (5, 9)     | 2 (1, 4) | Discarded by panel; agreed to discuss in working group                                 | 7 (5, 9) | None                 | Keep |

|                                             |          |              |                    |          |      |      |
|---------------------------------------------|----------|--------------|--------------------|----------|------|------|
| Patient-reported Outcomes – Multi-attribute | 7 (5, 8) | Discard      | Discarded by panel | N/A      | N/A  | N/A  |
| Patient Reported Outcomes- Mental Health    | 7 (5, 9) | Discard      | Discarded by panel | N/A      | N/A  | N/A  |
| <b>Global Indicator (n=1)</b>               |          |              |                    |          |      |      |
| Friends and Family Test                     | 7 (5, 9) | 6.5 (2.5, 7) | None               | 7 (6, 8) | None | Keep |
