# Supplementary material for: Improving the quality of person-centred healthcare from the patient perspective: development of person-centred quality indicators
Source: PubMed Central journal article supplement — BMJ Open. 2020 Oct 29;10(10):e037323. doi: 10.1136/bmjopen-2020-037323 (PMC7597468; doi:10.1136/bmjopen-2020-037323), 2020-10-29
Supplement: bmjopen-2020-037323supp001.pdf [file bmjopen-2020-037323supp001.pdf]

**Appendix 1:** Summary of Ratings [median score on 9-point scale and interquartile range (IQR)] and Modifications for PC-QIs Rated and Revised (PC-QIs = 39)

| Initial Person-Centred Quality Indicators                                 | Round 1 Remote Panel Rating Median Score on 9-point Scale (IQR) | Round 2 Face-to-Face Panel Rating Median Score on 9-point Scale (IQR) – as applicable for disagreement<br>*initially rated as Keep/Discard | Round 2 Modifications                                     | Round 3 Remote Panel Rating Median Score on 9-point Scale (IQR) | Round 3 Modifications   | Round 4 Final Remote Panel Rating – Keep/Discard |
|---------------------------------------------------------------------------|-----------------------------------------------------------------|--------------------------------------------------------------------------------------------------------------------------------------------|-----------------------------------------------------------|-----------------------------------------------------------------|-------------------------|--------------------------------------------------|
| <b>Structure Indicators</b>                                               |                                                                 |                                                                                                                                            |                                                           |                                                                 |                         |                                                  |
| Policy on Person-Centred Care                                             | 8 (6, 9)                                                        | Keep                                                                                                                                       | Expanded on description                                   | 8 (7, 8)                                                        | None                    | Keep                                             |
| Educational Programs on Person-Centred care                               | 8 (7, 9)                                                        | Keep                                                                                                                                       | Expanded on description                                   | 8 (7, 8)                                                        | Expanded on description | Keep                                             |
| Protocol addressing Discriminatory Care                                   | 7.5 (6, 9)                                                      | Keep                                                                                                                                       | Merged with “Educational Programs on Person-Centred Care” | N/A                                                             | N/A                     | N/A                                              |
| Protocol Addressing Cultural Competence                                   | 7 (6, 9)                                                        | Keep                                                                                                                                       | Changed wording to “Culturally Competent Care”            | 8 (7, 8)                                                        | Expanded on definition  | Keep                                             |
| Educational Programs reflecting Cultural Competency and Cultural Humility | 7 (6, 9)                                                        | Keep                                                                                                                                       | Merged with “Culturally Competent Care”                   | N/A                                                             | N/A                     | N/A                                              |

|                                                                                |            |              |                                                                                              |          |                                                        |      |
|--------------------------------------------------------------------------------|------------|--------------|----------------------------------------------------------------------------------------------|----------|--------------------------------------------------------|------|
| Program/Protocol for recruitment and retention of staff of diverse backgrounds | 8 (5.5, 9) | Keep         | Merged with "Educational Programs on Person-Centred Care"                                    | N/A      | N/A                                                    | N/A  |
| Supporting a Workforce Committed to Person-Centred Care                        | 7 (4, 9)   | Disagreement | Merged with "Policy on Person-Centred Care"                                                  | N/A      | N/A                                                    | N/A  |
| Providing a Supportive and Accommodating Person-Centred Care Environment       | 7 (5, 8)   | Keep         | Clarified language in description                                                            | 7 (6, 8) | None                                                   | Keep |
| Providing an Environment that Reflects Diversity and Inclusion                 | 8 (5, 9)   | Keep         | Merged with "Providing a Supportive and Accommodating Person-Centred Care Environment"       | N/A      | N/A                                                    | N/A  |
| Partnership with Communities                                                   | 8 (6, 9)   | Keep         | Expanded description; changed wording to "Co-designing care in partnership with communities" | 8 (7, 8) | Components merged with "Policy on Person-Centred Care" | Keep |
| Protocol for the Integration of                                                | 8 (5, 9)   | Keep         | Expanded description;                                                                        | 8 (6, 8) | Components merged with                                 | N/A  |

|                                                      |          |      |                                                                                       |          |                                 |      |
|------------------------------------------------------|----------|------|---------------------------------------------------------------------------------------|----------|---------------------------------|------|
| Structures to Support Health Information Technology  |          |      | changed working to “Healthcare Information Technology to Support Person-Centred Care” |          | “Policy on Person-Centred Care” |      |
| Structures to Report Person-Centred Care Performance | 8 (8, 9) | Keep | Changes to description of data source                                                 | 8 (8, 9) | None                            | Keep |
| <b>Process Indicators</b>                            |          |      |                                                                                       |          |                                 |      |
| Compassionate Care                                   | 9 (8, 9) | Keep | Broadening of definition, providing example measures                                  | 8 (8, 9) | None                            | Keep |
| Equitable care                                       | 8 (7, 9) | Keep | Broadening of definition, providing example measures                                  | 9 (8, 9) | Expanded definition             | Keep |
| Trusting Relationship with Healthcare Provider       | 9 (8, 9) | Keep | Broadening of definition, providing example measures                                  | 8 (8, 9) | None                            | Keep |
| Accessing Interpreter Services                       | 8 (7, 9) | Keep | Broadening of definition, providing example measures                                  | 8 (7, 9) | None                            | Keep |

|                                                                   |            |      |                                                                    |          |                                                                     |      |
|-------------------------------------------------------------------|------------|------|--------------------------------------------------------------------|----------|---------------------------------------------------------------------|------|
| Communication with Healthcare System                              | 8 (7, 9)   | Keep | Broadening of definition, providing example measures               | 8 (8, 9) | Example items from measure included                                 | Keep |
| Communication between Patient and Healthcare Provider - Nurse     | 8 (7.5, 9) | Keep | Broadening of definition                                           | 8 (8, 9) | Edits to example measures                                           | Keep |
| Communication between Patient and Healthcare Provider - Physician | 8 (8, 9)   | Keep | Broadening of definition                                           | 9 (8, 9) | Edits to example measures                                           | Keep |
| Information about Taking Medication                               | 9 (7, 9)   | Keep | Expanded on description                                            | 8 (8, 9) | Expanded description                                                | Keep |
| Communicating Test Results                                        | 8 (7, 9)   | Keep | Expanded on description; providing example measures                | 8 (8, 9) | None                                                                | Keep |
| Coordinating Your Care                                            | 9 (7, 9)   | Keep | Expanded on description; changed wording to "Coordination of Care" | 8 (8, 9) | Expanded on definition                                              | Keep |
| Patient Involvement in Decisions About Their Care and Treatment   | 8 (8, 9)   | Keep | Broadening of definition                                           | 9 (8, 9) | Changed wording to "Patient and Caregiver Involvement in Decisions" | Keep |

|                                                          |            |         |                                                                                                       |            |                                 |      |
|----------------------------------------------------------|------------|---------|-------------------------------------------------------------------------------------------------------|------------|---------------------------------|------|
|                                                          |            |         |                                                                                                       |            | about Their Care and Treatment” |      |
| Engaging Patients in Managing their Own Health           | 8 (7, 9)   | Keep    | Clarification of self-management                                                                      | 8 (8, 9)   | Expanded on definition          | Keep |
| Timely Access to a Primary Care Provider                 | 8 (7, 9)   | Keep    | None                                                                                                  | 8 (6.5, 9) | None                            | Keep |
| Patient preparation for a planned admission to hospital  | 8 (7, 9)   | Keep    | Broadening of definition and wording changed to “Patient Preparation for a Planned Treatment Program” | 8 (7, 9)   | None                            | Keep |
| Time to Unplanned Admission Through Emergency Department | 7.5 (6, 9) | Discard | Discarded by panel                                                                                    | N/A        | N/A                             | N/A  |
| Discharge Planning                                       | 9 (8, 9)   | Keep    | Change focus from discharge to continuum of care; wording changed to “Transition Planning”            | 9 (8, 9)   | Edits to example measures       | Keep |

|                                                                                       |              |          |                                                                                        |          |                      |      |
|---------------------------------------------------------------------------------------|--------------|----------|----------------------------------------------------------------------------------------|----------|----------------------|------|
| Post-Discharge Planning                                                               | 8 (7, 9)     | Keep     | Merged with "Transition Planning"                                                      | N/A      | N/A                  | N/A  |
| Timely Follow-up with Hospital Discharged Patients                                    | 8 (5, 9)     | Keep     | Merged with "Transition Planning"                                                      | N/A      | N/A                  | N/A  |
| Discharge Summaries Available to Community Care Provider Within 48 Hours of Discharge | 8 (7, 9)     | Keep     | Merged with "Transition Planning"                                                      | N/A      | N/A                  | N/A  |
| Noise During Hospitalization/Stay                                                     | 7 (6, 8)     | Keep     | Merged with "Providing a supportive and accommodating person-centred care environment" | N/A      | N/A                  | N/A  |
| <b>Outcome Indicators</b>                                                             |              |          |                                                                                        |          |                      |      |
| Overall Rating                                                                        | 7.5 (5, 8.5) | Discard  | Discarded by panel                                                                     | N/A      | N/A                  | N/A  |
| Overall Experience                                                                    | 8 (6, 9)     | Keep     | None                                                                                   | 9 (7, 9) | Expanded description | Keep |
| Cost of Care-Affordability                                                            | 6.5 (5, 9)   | Keep     | None                                                                                   | 7 (5, 9) | None                 | Keep |
| Patient-Reported Outcomes – General Health                                            | 7 (5, 9)     | 2 (1, 4) | Discarded by panel; agreed to discuss in working group                                 | 7 (5, 9) | None                 | Keep |

|                                             |          |              |                    |          |      |      |
|---------------------------------------------|----------|--------------|--------------------|----------|------|------|
| Patient-reported Outcomes – Multi-attribute | 7 (5, 8) | Discard      | Discarded by panel | N/A      | N/A  | N/A  |
| Patient Reported Outcomes- Mental Health    | 7 (5, 9) | Discard      | Discarded by panel | N/A      | N/A  | N/A  |
| <b>Global Indicator (n=1)</b>               |          |              |                    |          |      |      |
| Friends and Family Test                     | 7 (5, 9) | 6.5 (2.5, 7) | None               | 7 (6, 8) | None | Keep |
